# Supplementary material for: A tin-based tandem electrocatalyst for CO2 reduction to ethanol with 80% selectivity
Source: Research Square preprint supplement (doi:10.21203/rs.3.rs-1924605/v1), 2022-08-12
Supplement: Supplementary file 1 [file 42ed786c89332ef00db0e2c1.docx]

Extended data for

A tin-based tandem electrocatalyst for CO2 reduction to ethanol with 80% selectivity

**Authors:**

Jie Ding1,2,#, Hong Bin Yang1,2,#, Xue-Lu Ma3,4,#, Song Liu1,2,#, Wei Liu1, Qing Mao5, Yanqiang Huang1,*, Jun Li3,*, Tao Zhang1, and Bin Liu2,*

**Affiliations:**

1CAS Key Laboratory of Science and Technology on Applied Catalysis, Dalian Institute of Chemical Physics, Chinese Academy of Sciences, Dalian, China.

2School of Chemical and Biomedical Engineering, Nanyang Technological University, Singapore, Singapore.

3Department of Chemistry and Key Laboratory of Organic Optoelectronics & Molecular Engineering of Ministry of Education, Tsinghua University, Beijing, China.

4School of Chemical & Environmental Engineering, China University of Mining & Technology, Beijing, China.

5School of Chemical Engineering, Dalian University of Technology, Dalian, China.

#Equal contribution.

Correspondence to: [yqhuang@dicp.ca.cn](mailto:yqhuang@dicp.ca.cn) (Y. Huang); [junli@mail.tsinghua.edu.cn](mailto:junli@mail.tsinghua.edu.cn) (J. Li); and [liubin@ntu.edu.sg](mailto:liubin@ntu.edu.sg) (B. Liu).

**This PDF file includes:**

Materials and Methods

Figs. 1 to 58

Tables 1 to 18

Methods

***Preparation of three-dimensional (3D) carbon***

The 3D carbon was prepared according to a literature procedure (Extended data Fig. 1) *1*. In brief, HY zeolite was first heated to 600 °C under a dry N2 flow in a fused quartz reactor. Then, a mixture of ethylene gas and N2 (volume ratio = 50 : 50) was passed through a water bubbler and fed into the zeolite bed at 600 °C for 30 min. The gas flow was switched to dry N2 when carbon deposition was completed. Afterwards, the temperature was increased to 950 °C and maintained there for 2 h. The resulting product was washed in a 0.5 M HF/0.2 M HCl solution to release carbon from the template. Finally, the as-prepared 3D carbon was dried in a vacuum oven for 24 h at 60 °C for further utilization.

***Preparation of SnS2/ Sn1-O3G***

The detailed preparation procedure of vertically aligned SnS2 on Sn1-O3G is illustrated in Extended data Fig. 2, in which, 2 mmol SnBr2 and 2 mmol thiourea were added into a mixed solution containing 20 mL of oleic acid and 2.5 mL of oleyamine under magnetic stirring at 80 °C for 8 h (SnS2 precursor solution). Meanwhile, 20 mg 3D carbon was dispersed into 10 mL of isopropanol under magnetic stirring at room temperature, followed by added into the SnS2 precursor solution under magnetic stirring at room temperature for 2 h. Then, the obtained solution was transferred to a 100 ml Teflon-lined stainless-steel autoclave to perform solvothermal reaction at 200 °C for 20 h. After cooling down to room temperature, the solid product was washed with ethanol and deionized water, collected by centrifugation, and dried in a vacuum oven for 24 h at 40 °C for further utilization (SnS2/Sn1-O3G).

***Preparation of Sn single-atom catalyst***

The SnS2/Sn1-O3G was successively leached at 80 °C in 2 M HCl for 24 h to remove SnS2 nanosheets and unstable species (Sn1-O3G).

***Preparation of SnS2***

2 mmol SnBr2 and 2 mmol thiourea were added into a mixed solution containing 20 mL of oleic acid and 2.5 mL of oleyamine under magnetic stirring at 80 °C for 8 h. Then, the solution was transferred to a 100 ml Teflon-lined stainless-steel autoclave to perform solvothermal reaction at 200 °C for 20 h. After cooling down to room temperature, the solid product was washed with ethanol and deionized water, collected by centrifugation, and dried in a vacuum oven for 24 h at 40 °C for further utilization.

Characterization

The crystal structure and morphology of the catalysts were examined by X-ray diffraction (XRD, Bruker AXS D8 Advance) with Cu Kα radiation (λ = 1.5406 Å), field-emission scanning electron microscopy (FESEM, JEOL JSM-6700F), transmission electron microscopy (TEM, JEOL JEM-2100F), and energy dispersive X-ray spectroscopy (EDX, Aztec X-Max 80T). Sub-ångström-resolution high-angle annular dark-field scanning transmission electron microscopy (HAADF-STEM) characterization was conducted on a JEOL JEMARM200F STEM/TEM with a guaranteed resolution of 0.08 nm. Detailed chemical compositions were analyzed by X-ray photoelectron spectroscopy (XPS) on an ESCALAB 250 photoelectron spectrometer (Thermo Fisher Scientific) using a monochromatic Al Kα X-ray beam (1,486.6 eV). All binding energies were referenced to the C 1s peak (284.6 eV). The 119Sn Mössbauer spectra were collected at room temperature using 119Sn in the BaSnO3 as an emitter, and the isomer shift (IS) was given with respect to the centroid of BaSnO3 at room temperature. The Sn contents in the catalysts were quantified by inductively coupled plasma optical emission spectroscopy (ICP-OES; ICPS-8100, Shimadzu).

***Electrochemical measurements***

Electrochemical CO2 reduction reaction. A 0.5 M potassium bicarbonate aqueous solution was used as the electrolyte for the electrochemical CO2 reduction reaction (CO2RR). Ultrapure water (18.2 MΩ∙cm) was used to prepare all electrolytes. Electrochemical measurements were conducted in a H-type cell separated by a Nafion 117 membrane between the cathodic and anodic chambers. A mass flow controller was used to control the CO2 flow rate at 20 sccm. Extended data Fig. 3 shows the experimental setup for electrochemical CO2RR, in which, Pt sheet and saturated calomel electrode (SCE) serve as counter and reference electrode, respectively. To prepare the working electrode, the catalyst ink (5 mg∙ml−1) that was prepared by ultrasonically mixing 10 mg of the catalyst, 0.98 mL of Millipore Q H2O (15 MU), 0.98 mL of isopropyl alcohol, and 50 mL of 5 wt.% D520 Nafion dispersion solution, was brush-painted onto a carbon fiber paper (AvCarb P75T) at a temperature of 40 °C, giving a catalyst loading of 0.5 mg∙cm−2. The CO2 was bubbled into the potassium bicarbonate electrolyte for 1 h before starting electrolysis. The pH of electrolyte in bulk and near the surface of working electrode (WE) during the CO2RR were measured by a pH meter (S220 SevenCompactTM pH/Ion) (Extended data Table 1). The Ohmic resistance was measured by electrochemical impedance spectroscopy (EIS) at open circuit voltage. In the EIS measurement, a sinusoidal AC perturbation of 5 mV was applied to the electrode over the frequency range from 0.5 to 105 Hz. The typical Ohmic resistance of the electrode (1 cm2) is about 4.5 Ω in CO2 saturated 0.5 M bicarbonate solution. The linear sweep voltammetry (LSV) curves were recorded on a CHI-660E electrochemical workstation at a scan rate of 5 mV∙s–1. All potentials were reported with respect to the RHE scale and corrected by IR drop compensation. All potentials were calculated with respect to the reversible hydrogen electrode (RHE) scale according to the Nernst equation (ERHE = ESCE + 0.0591 × pH + 0.241 V, at 25 °C).

***CO2RR products quantification***

The gaseous products (H2, CO and CH4) were quantified by a gas chromatograph (GC, Agilent 7890) equipped with a flame ionization detector (FID) for CO and CH4 and a thermal conductivity detector (TCD) for H2 quantification. Ultrapure N2 was used as the carrier gas for the chromatography. The Faradaic efficiency (FE) of each gas product was calculated by:

where *i* represents CO, H2 or CH4; zi is the number of electrons required to produce an i molecule, which is 2, 2 and 8 for CO, H2 and CH4; vi is the volume ratio of product i in the GC sampling loop; G is the volumetric flow rate; F is Faradaic constant (96,500 C∙mol−1); P0 is atmospheric pressure (1.013 × 105 Pa); I is the average current, calculated from the chronoamperometric curves (Extended data Fig. 4) in a period (t) of electrocatalysis: I=; R is ideal gas constant (8.314 J·mol–1·K–1); and T0 is the reaction temperature (298 K).

NMR is generally not used quantitatively because differences in the T1s of analytes can lead to different peak areas when measurements are made under different conditions, such as different number of scans or different solution compositions. In addition, there are other factors, such as shimming and phasing, that can cause differences in peak areas. Despite these difficulties, we found NMR extremely useful for the detection of electrochemical products because it could be performed directly on the electrolyte solution without the need to remove KHCO3. To avoid issues arising from the analyte and internal standard having different T1s, the same spectral acquisition parameters were used for all quantification spectra. In addition, solvent suppression was used to decrease the size of the water peak so that the smaller CO2 reduction product peaks could be visible. Extended data Fig. 5 shows a typical 1D 1H NMR spectrum collected for quantification of a sample containing CO2 reduction products and internal standard. Peak areas of products were compared to the internal standard to make standard curves. The internal standard, dimethyl sulfoxide (DMSO) was chosen because it does not interfere with peaks arising from CO2 reduction products and at the same time its non-volatility allows for the use and storage of the same internal standard solution for all product measurements in this study without appreciable change in concentration. Extended data Fig. 6 shows the standard curves for C2H5OH and HCOO- prepared from purchased standards based on the peaks as indicated in Extended data Table 2. Different standard curves for the same product are in good agreement with each other. When normalized to the number of protons in each of the peaks used to construct the standard curves, the slopes of the lines are in good agreement. The linearity of the curves and the good agreement of the normalized slopes suggest that it is possible in this case to accurately determine the concentration of products using NMR. Thus, all liquid products were analyzed by 1H NMR on a Bruker Avance III HD 400 NMR spectroscope. NMR data was analyzed by the NMR software (MestReNova). Before integration of the NMR peak, the phase and baseline correction of NMR peak were performed. The baseline and integration region of the NMR peak are marked up in each of the zoomed region as shown in Extended data Figs. 1-6. Integration of the peak area was performed using the NMR software (MestReNova). Extended data Fig. 7 shows the calibration curves used to determine the concentration of ethanol produced from CO2RR.


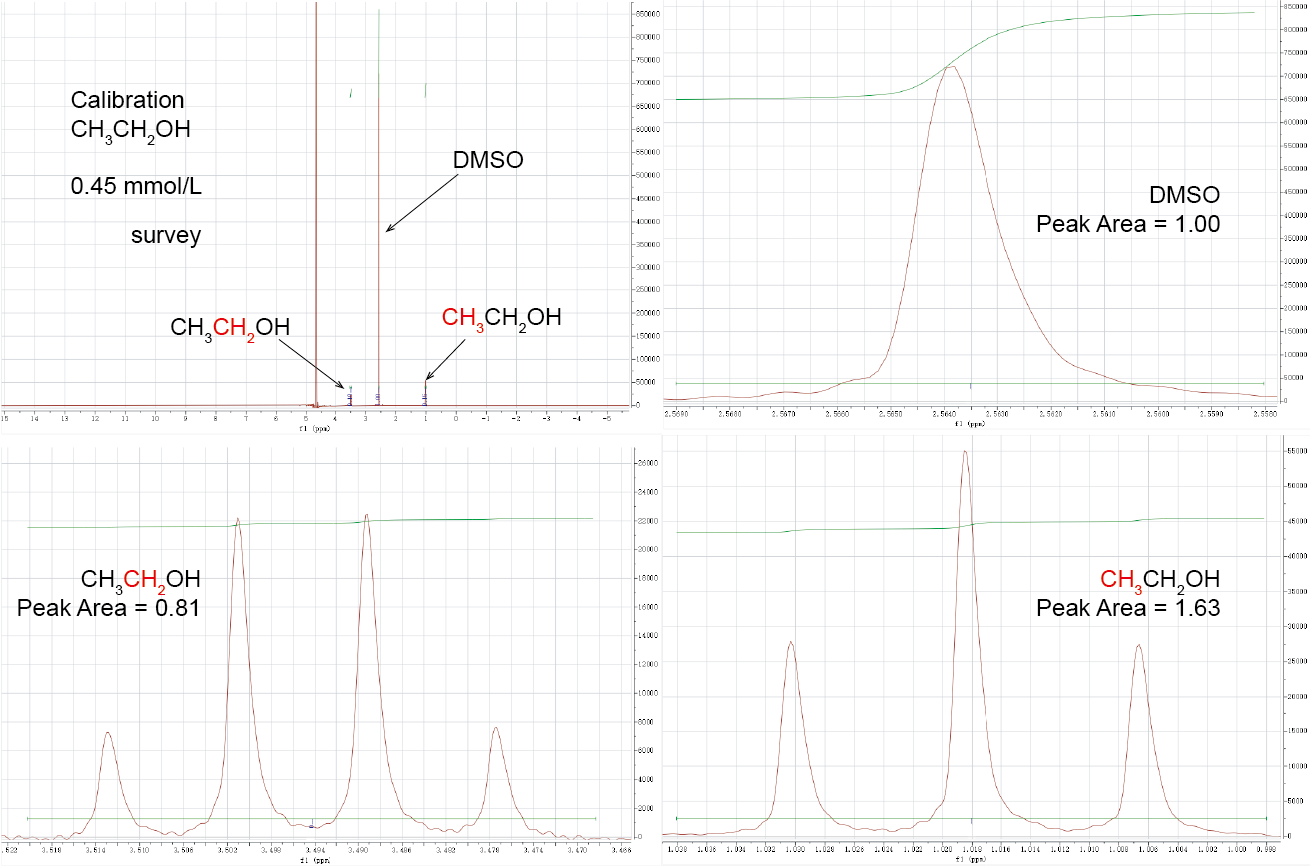


**Extended data Fig. 1 |** (**a**) The survey NMR spectrum of 0.45 mmol/L ethanol. The zoom in region of (**b**) DMSO, (**c**) CH2 and (**d**) CH3 with baseline and integrated peak area indicated.


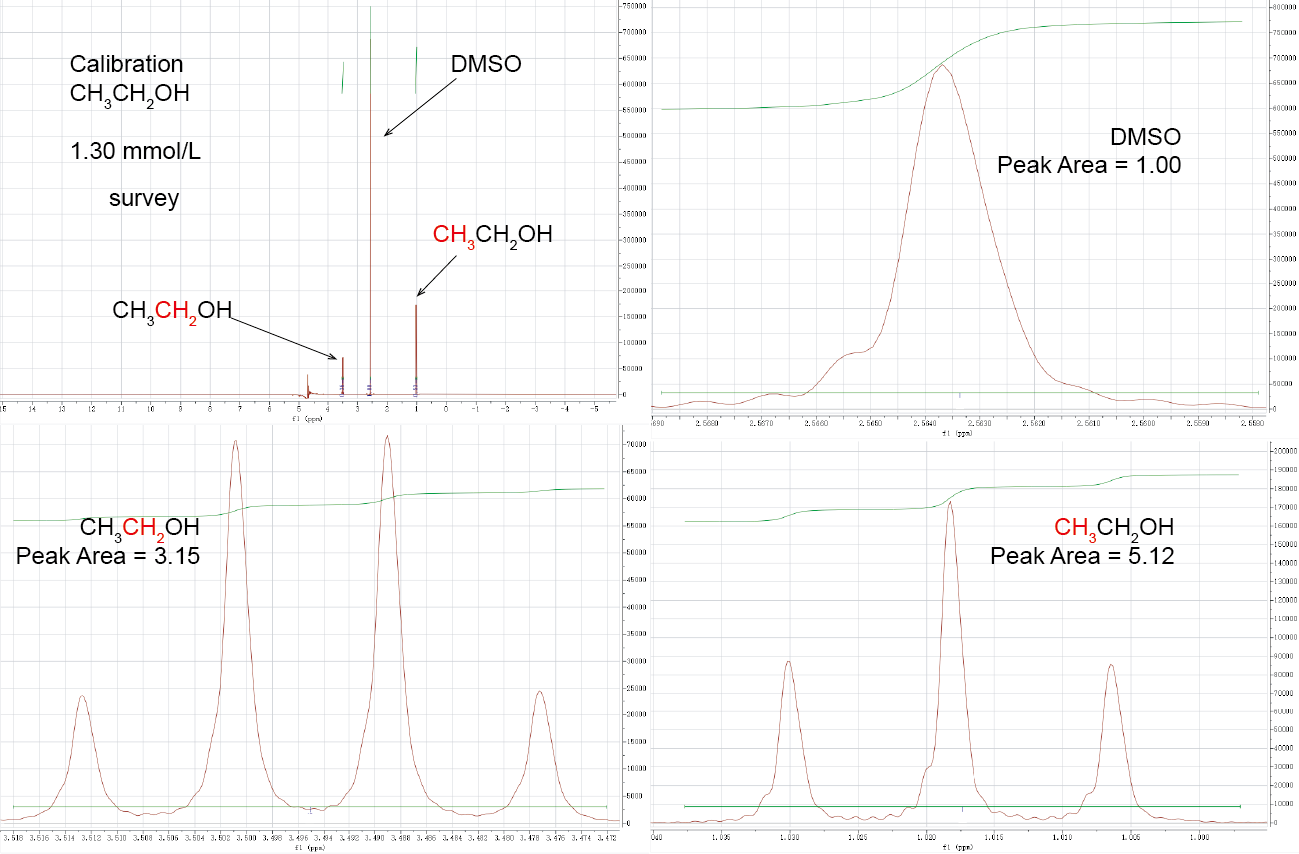


**Extended data Fig. 2 |** (**a**) The survey NMR spectrum of 1.30 mmol/L ethanol. The zoom in region of (**b**) DMSO, (**c**) CH2 and (**d**) CH3 with baseline and integrated peak area indicated.


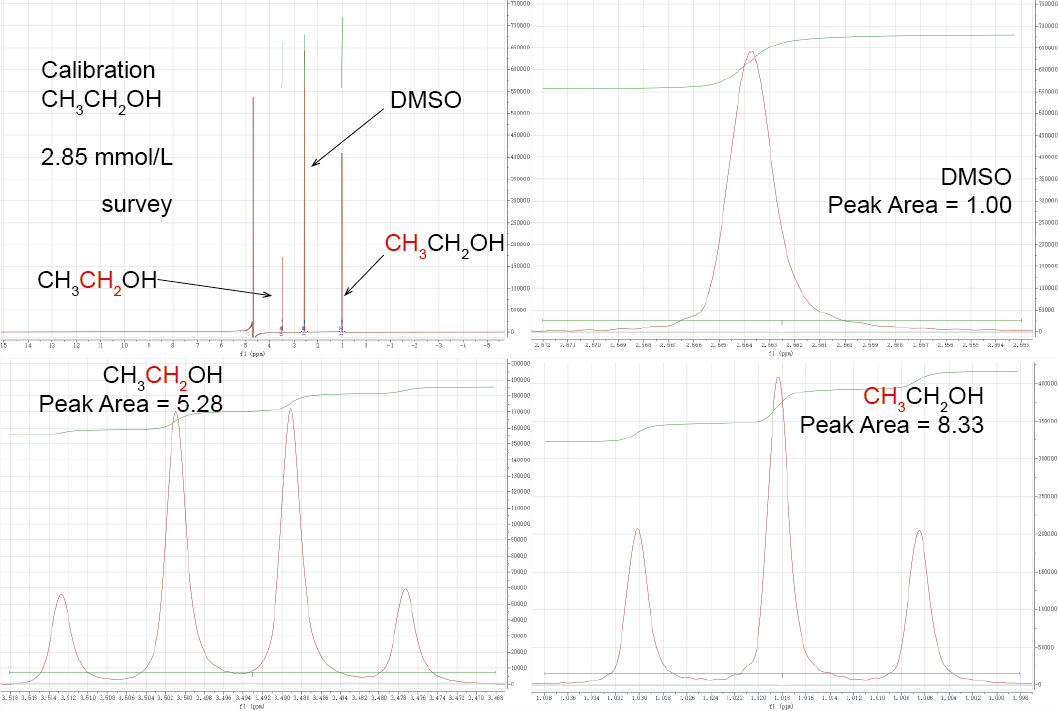


**Extended data Fig. 3 |** (**a**) The survey NMR spectrum of 2.85 mmol/L ethanol. The zoom in region of (**b**) DMSO, (**c**) CH2 and (**d**) CH3 with baseline and integrated peak area indicated.


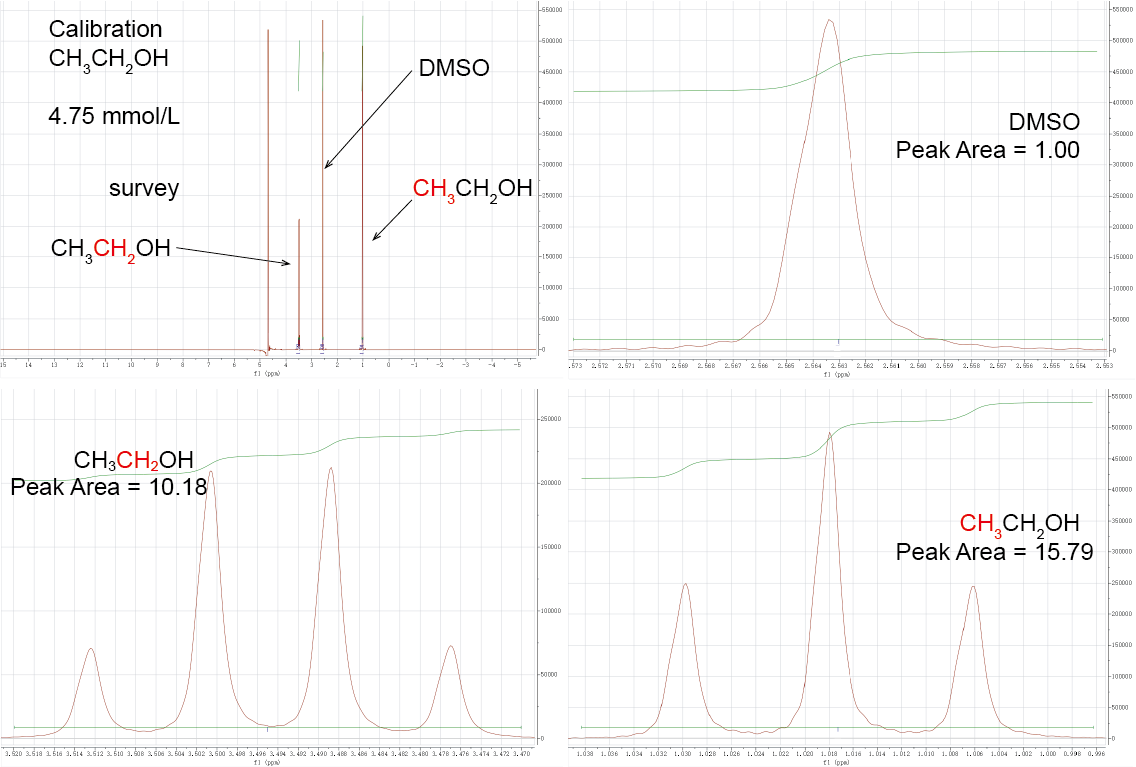


**Extended data Fig. 4 |** (**a**) The survey NMR spectrum of 4.75 mmol/L ethanol. The zoom in region of (**b**) DMSO, (**c**) CH2 and (**d**) CH3 with baseline and integrated peak area indicated.


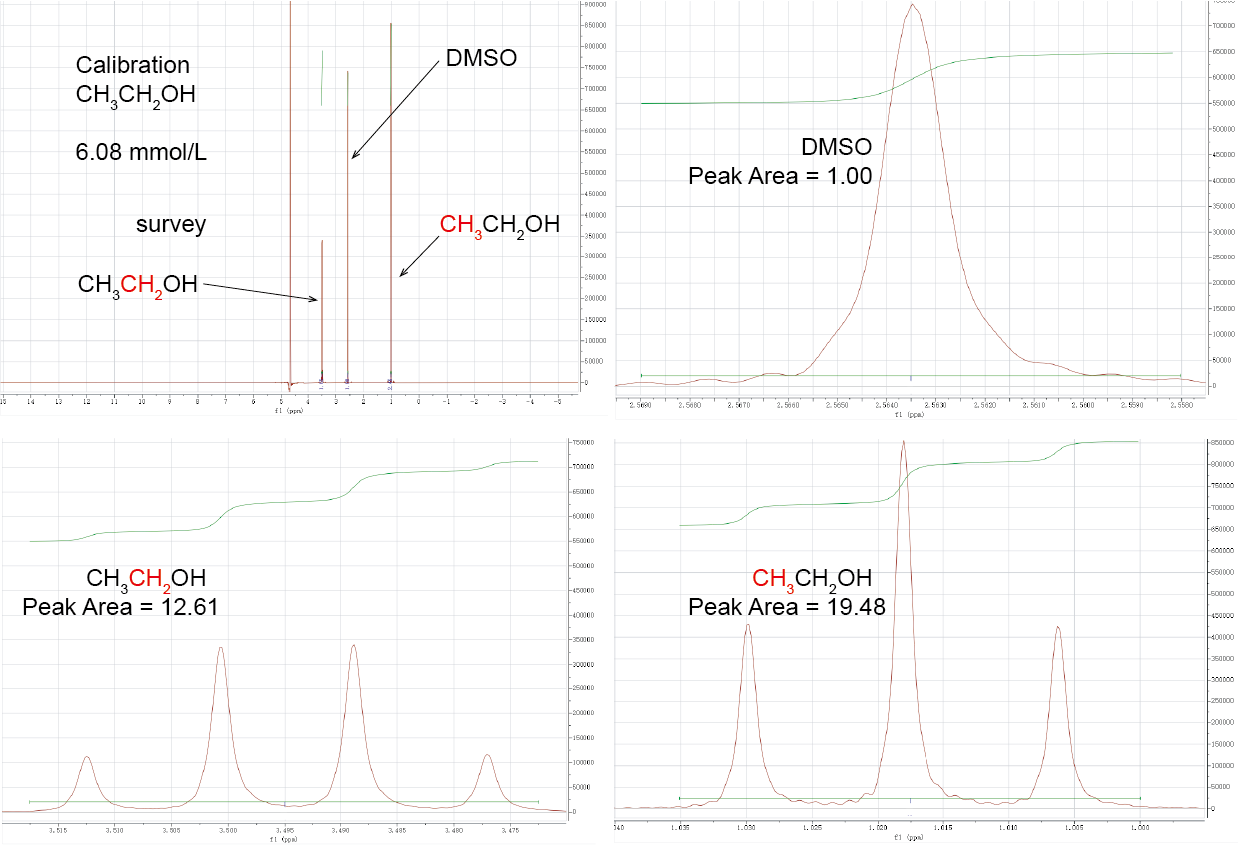


**Extended data Fig. 5 |** (**a**) The survey NMR spectrum of 6.08 mmol/L ethanol. The zoom in region of (**b**) DMSO, (**c**) CH2 and (**d**) CH3 with baseline and integrated peak area indicated.


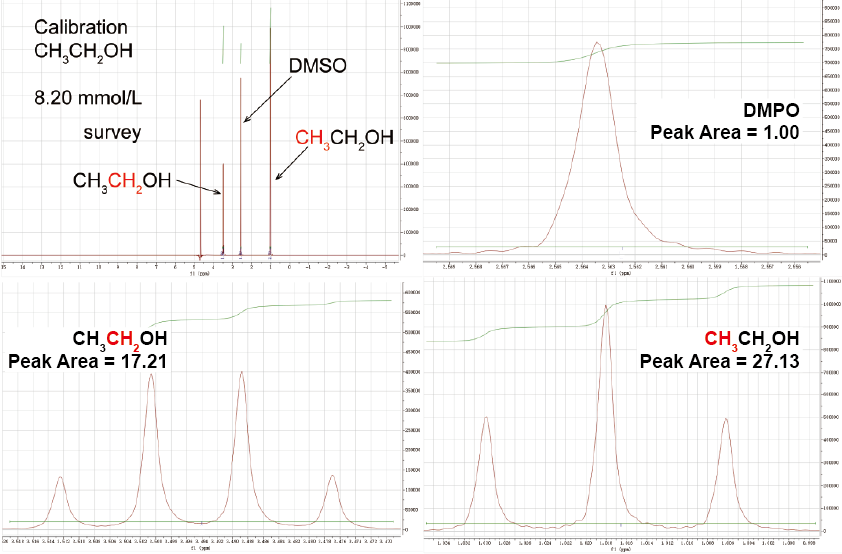


**Extended data Fig. 6 |** (**a**) The survey NMR spectrum of 8.20 mmol/L ethanol. The zoom in region of (**b**) DMSO, (**c**) CH2 and (**d**) CH3 with baseline and integrated peak area indicated.


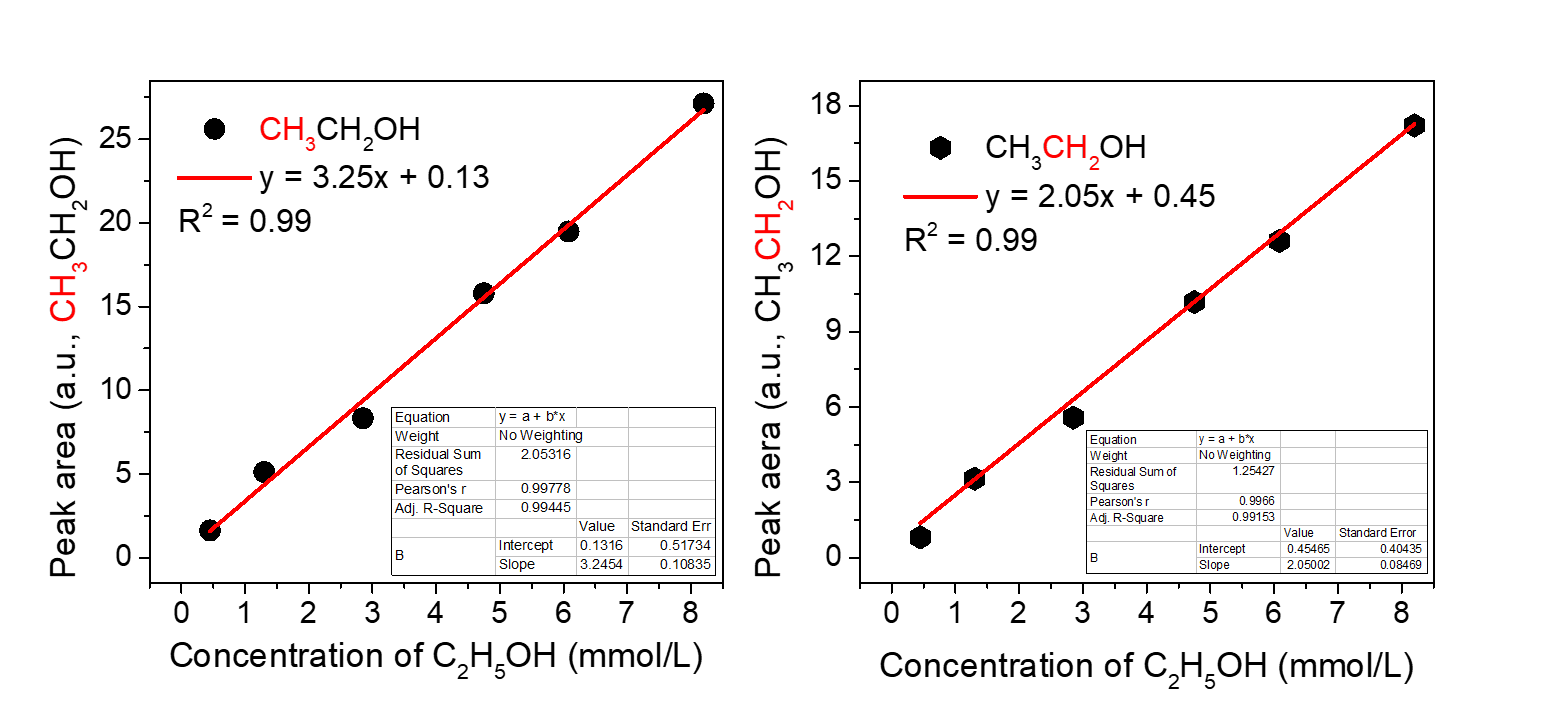


**Extended data Fig. 7 |** Calibration curves based on the area of the CH3 and CH2 peak in the NMR spectra.

The uncertainties of calibration by the peak area of CH3 and CH2 were determined based on the method described in the NIST/SEMATECH, e-Handbook of Statistical Methods (<https://www.itl.nist.gov/div898/handbook/mpc/section3/mpc3672.htm>). The calibration standard deviation based on the peak area of CH3 and CH2 was estimated to be 0.077 and 0.066 mmol/L, respectively.

The regression equation from the calibration experiment is:

(eq. 1)

Thus, based on the regression equation, by measuring the peak area of CH3 or CH2 from 1H 1D NMR spectrum, the concentration of ethanol could be determined:

(eq. 2)

**Extended data Table 1.** The concentration of ethanol determined based on calibration curves of CH3 and CH2.

|  |  | y = 3.25x + 0.13 (CH3CH2OH) | | | y = 2.05x + 0.45 (CH3CH2OH) | | |
| --- | --- | --- | --- | --- | --- | --- | --- |
|  |  | AC | A | CC | AC | A | CC |
| 1 |  | 2.5 | 7.70 | 2.33 | 2.5 | 5.39 | 2.41 |
| 2 |  | 4.8 | 15.83 | 4.83 | 4.8 | 10.66 | 4.98 |
| 3 |  | 6.0 | 20.02 | 6.12 | 6.0 | 12.52 | 5.89 |
| 4 |  | 7.5 | 25.09 | 7.68 | 7.5 | 15.89 | 7.53 |

AC represents the actual concentration (mmol/L), CC represents the calculated concentration (mmol/L) according to the calibration equation, and A represents the integrated peak area of NMR spectrum.

The four control measurements were made on reference standards with concentration of 2.5, 4.8, 6, and 7.5 mmol/L. Then, the difference between the estimated concentration (CC) from NMR measurement and the actual concentration (AC) was computed by eq. 3, the results are listed in Table 2:

(eq. 3)

Finally, the calibration standard deviation was estimated by:

(eq. 4)

where .

**Extended data Table 2.** The uncertainties of calibration based on the peak area of CH3 and CH2.

|  | y = y = 0.39x + 0.02 (CH3CH2OH) | y = 0.25x + 0.04 (CH3CH2OH) |
| --- | --- | --- |
|  | W = CC-AC (mmol/L) | W = CC-AC (mmol/L) |
| 1 | -0.17 | -0.09 |
| 2 | 0.03 | 0.18 |
| 3 | 0.12 | -0.11 |
| 4 | 0.18 | 0.03 |
| **S** | **0.077 mmol/L** | **0.067 mmol/L** |

The calibration standard deviation based on the peak area of CH3 and CH2 is 0.077 and 0.067 mmol/L, respectively.

The original NMR data for quantifying the liquid products at -0.6 to -1.1 V (vs. RHE) are displayed as the following:


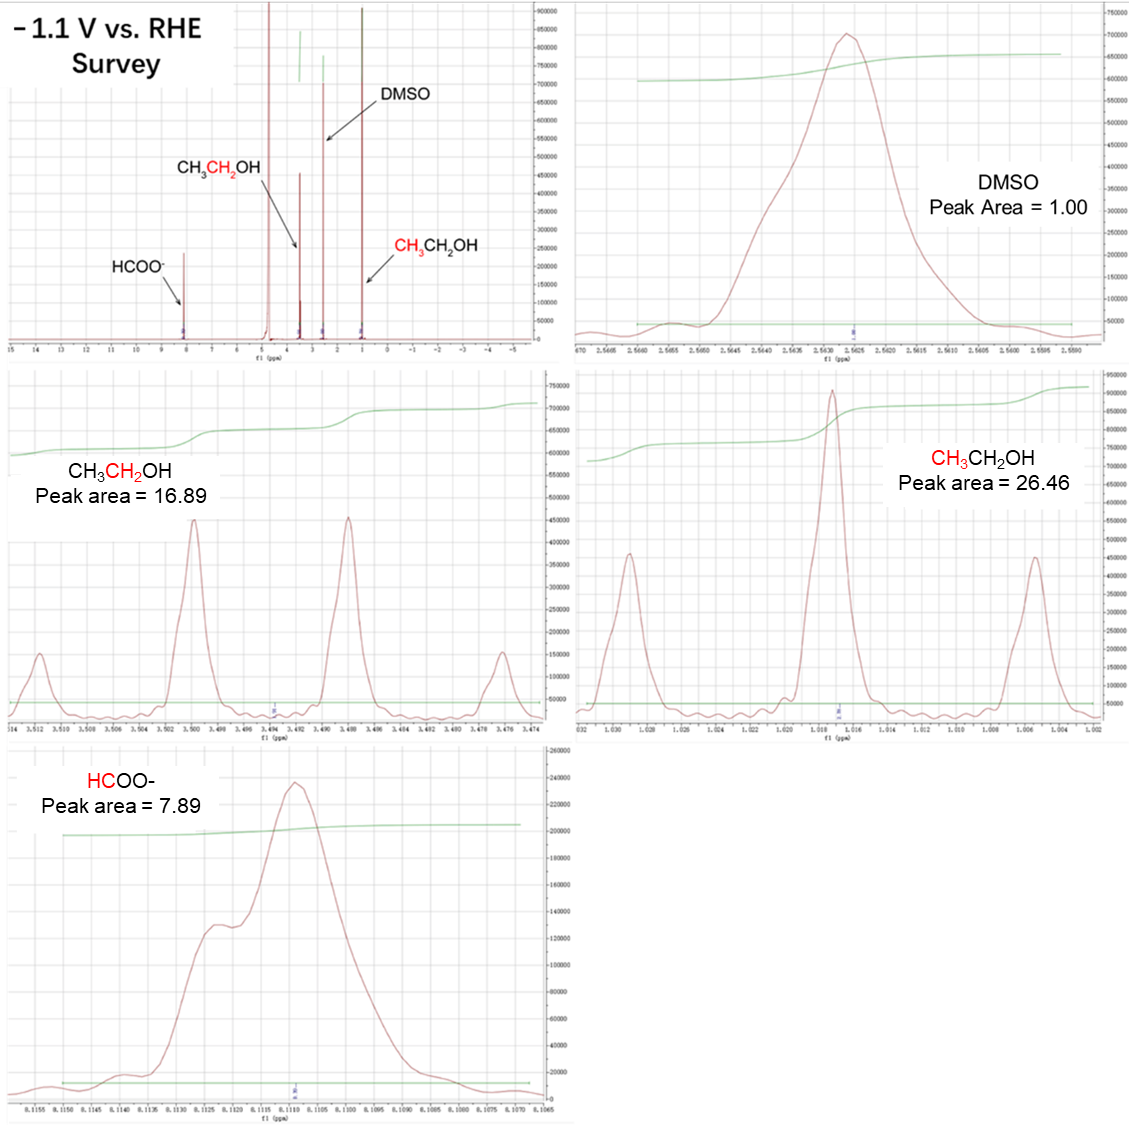


**Extended data Fig. 8 |** 1H 1D NMR spectra of products and DMSO at -1.1 V (vs. RHE), with baseline and integrated peak area indicated.


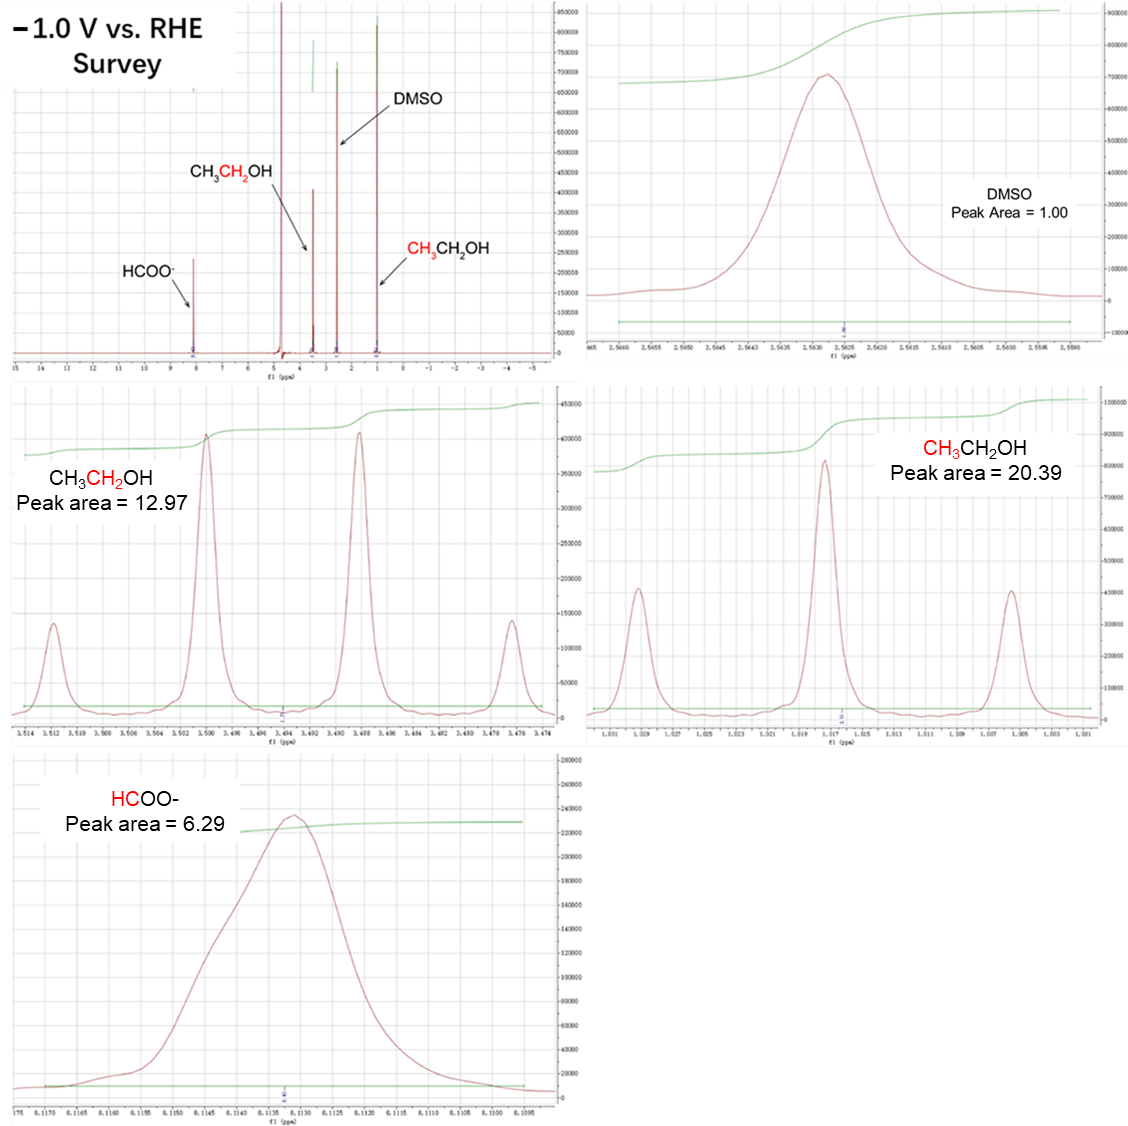


**Extended data Fig. 9 |** 1H 1D NMR spectra of products and DMSO at -1.0 V (vs. RHE), with baseline and integrated peak area indicated.


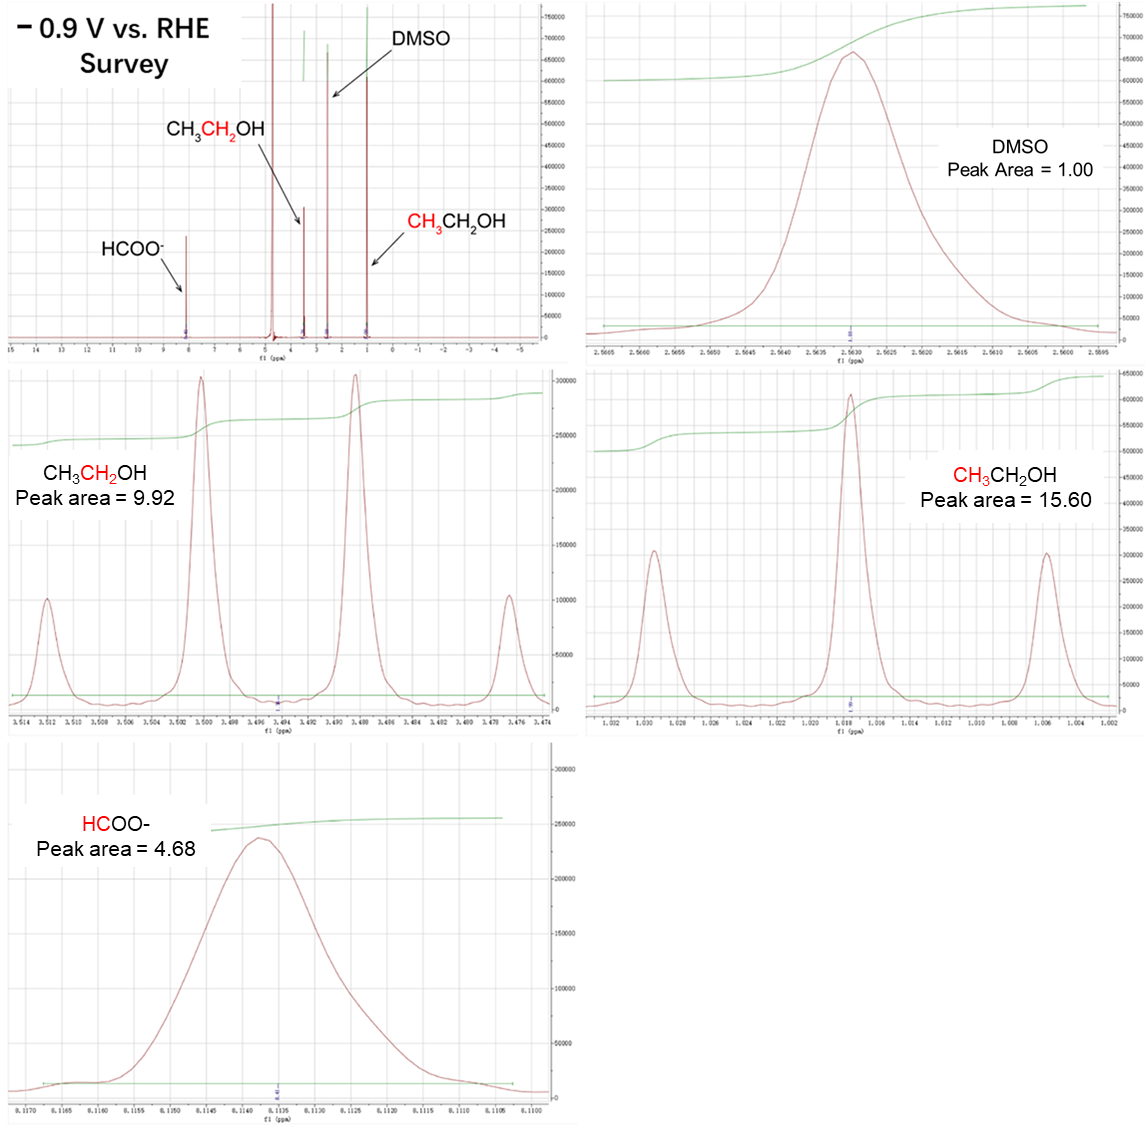


**Extended data Fig. 10 |** 1H 1D NMR spectra of products and DMSO at -0.9 V (vs. RHE), with baseline and integrated peak area indicated.


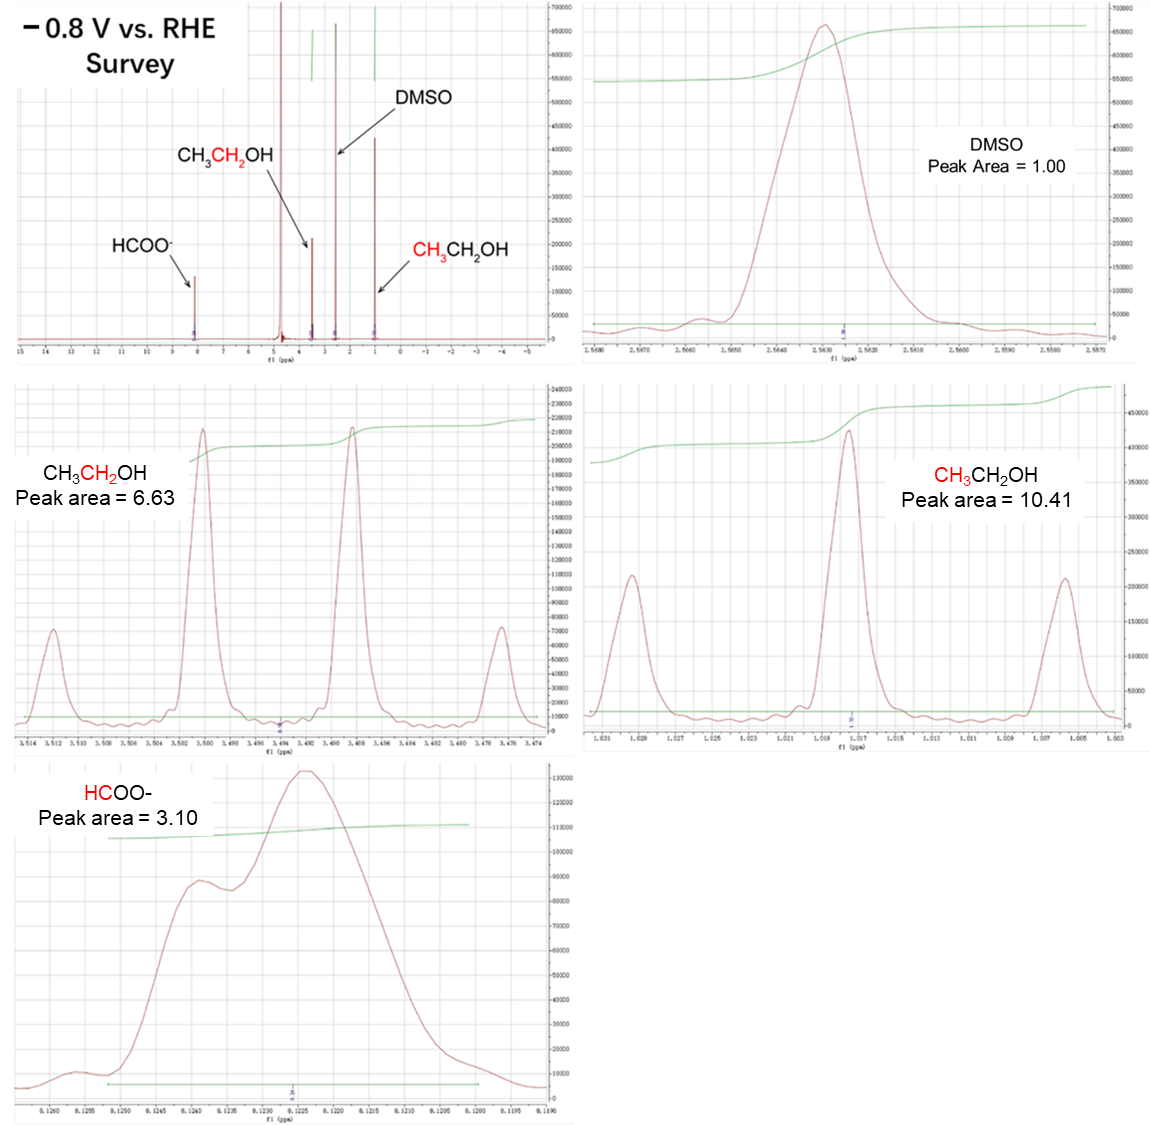


**Extended data Fig. 11 |** 1H 1D NMR spectra of products and DMSO at -0.8 V (vs. RHE), with baseline and integrated peak area indicated.


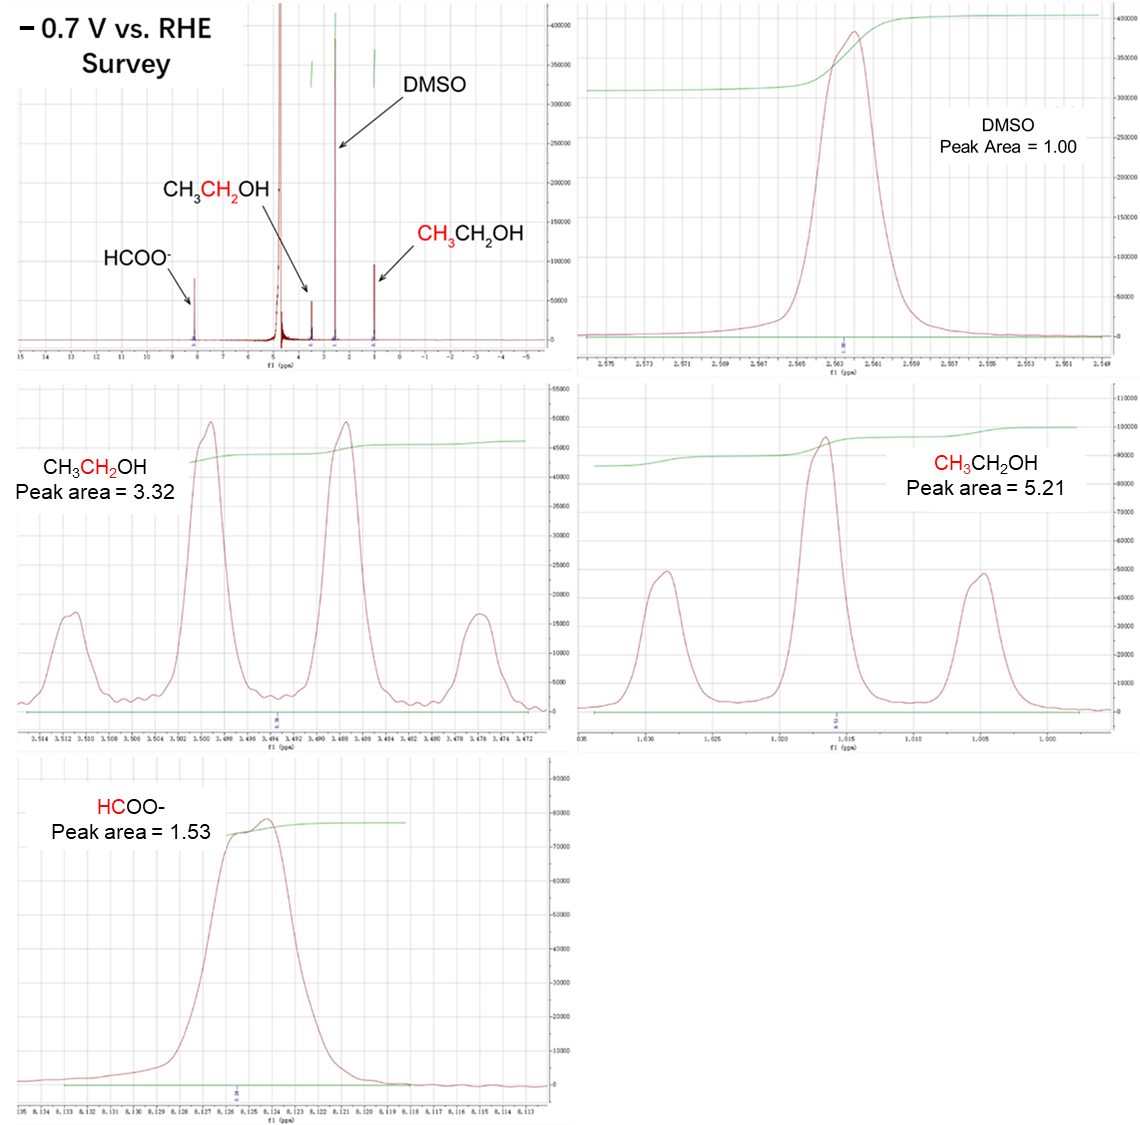


**Extended data Fig. 12 |** 1H 1D NMR spectra of products and DMSO at -0.7 V (vs. RHE), with baseline and integrated peak area indicated.


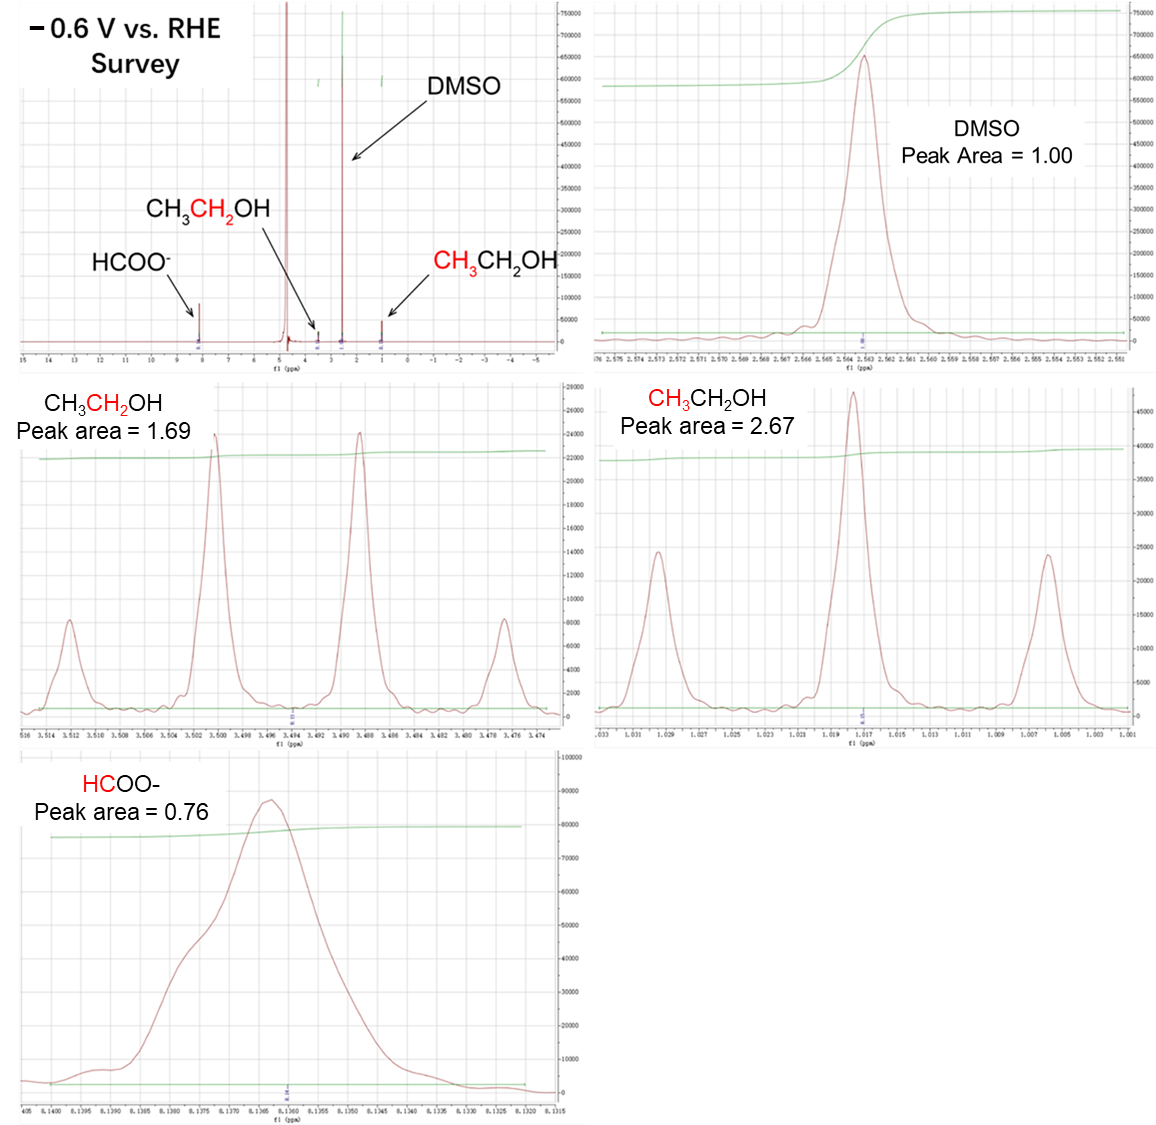


**Extended data Fig. 13 |** 1H 1D NMR spectra of products and DMSO at -0.6 V (vs. RHE), with baseline and integrated peak area indicated.

The concentrations of ethanol produced using isotopically labelled 13CO2 as the reactant were determined by the calibration curve (Extended data Fig. 20), in which the standards were constructed using the 13C isotopically labelled ethanol (13CH313CH2OH) (Extended data Figs. 14-19).


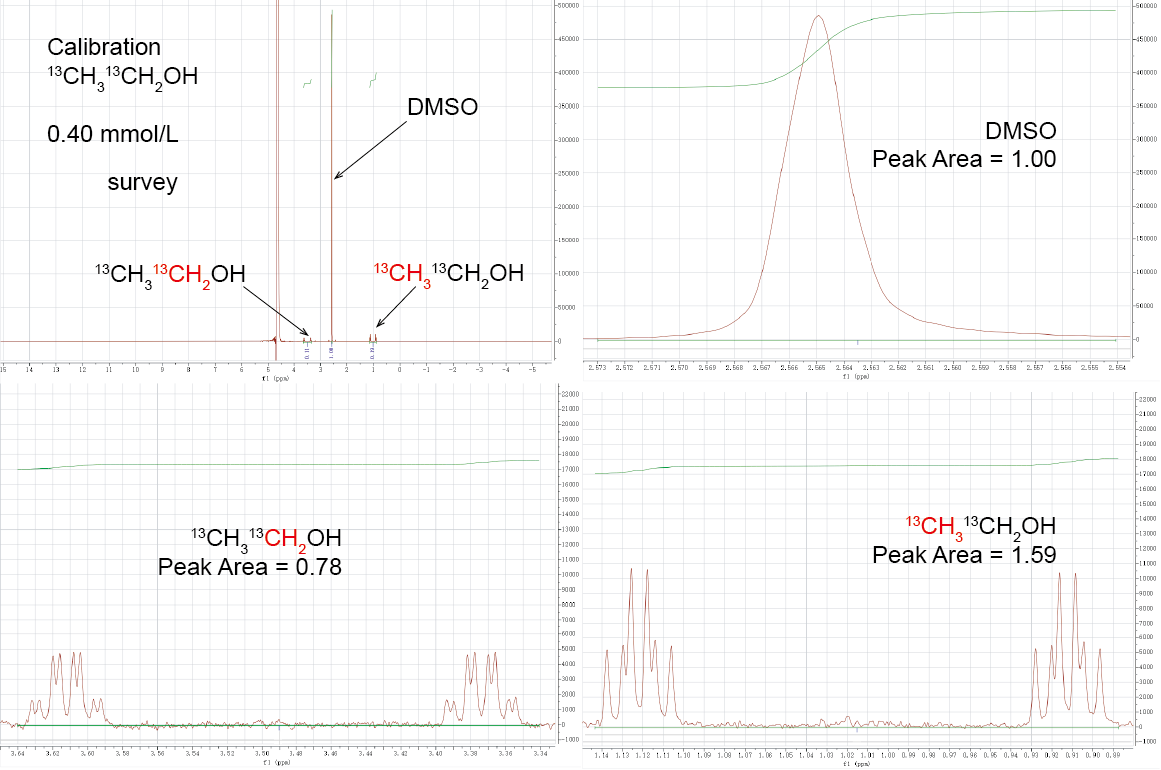


**Extended data Fig. 14 |** (**a**) The survey NMR spectrum of 0.40 mmol/L 13C labelled ethanol (13CH313CH2OH). The zoom in region of (**b**) DMSO, (**c**) CH2 and (**d**) CH3 with baseline and integrated peak area indicated.


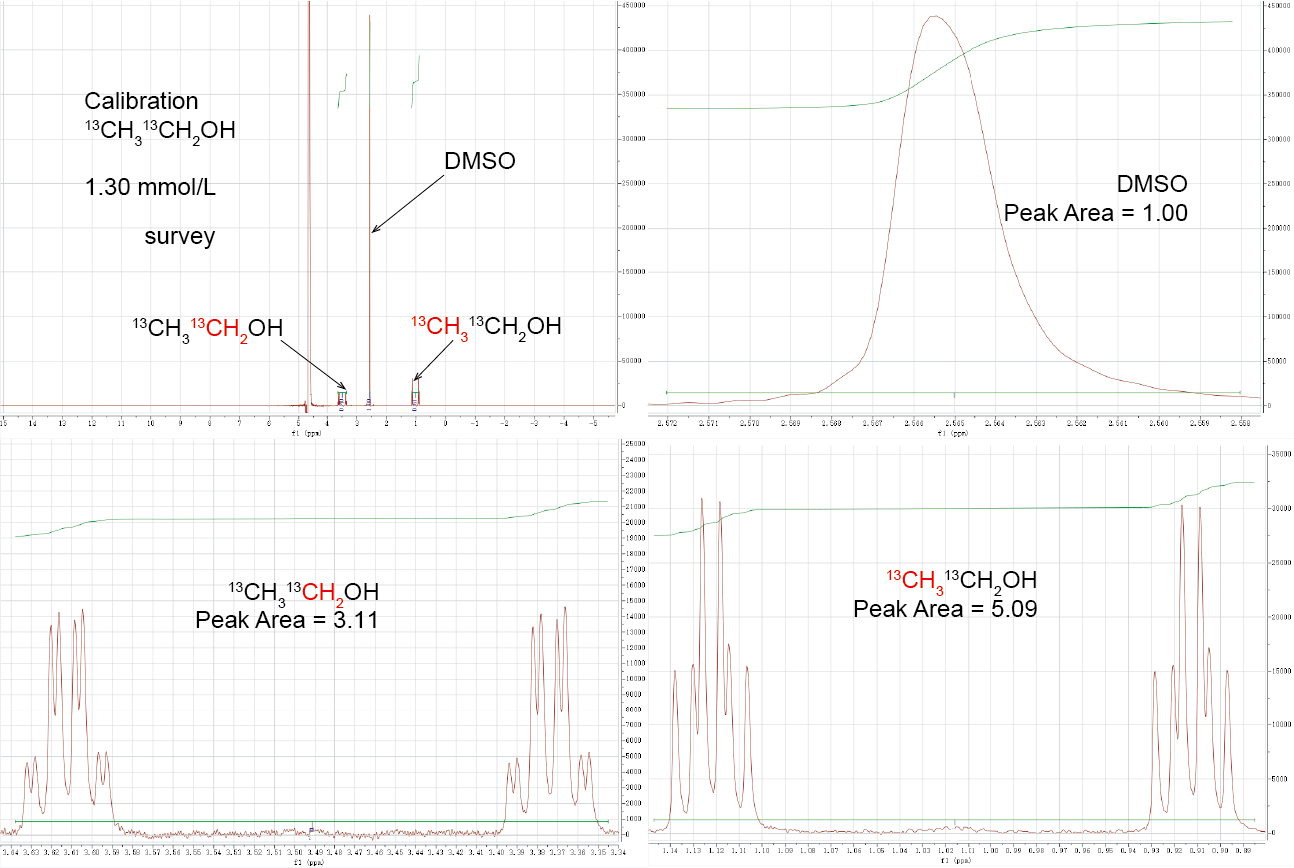


**Extended data Fig. 15 |** (**a**) The survey NMR spectrum of 1.30 mmol/L 13C labelled ethanol (13CH313CH2OH). The zoom in region of (**b**) DMSO, (**c**) CH2 and (**d**) CH3 with baseline and integrated peak area indicated.


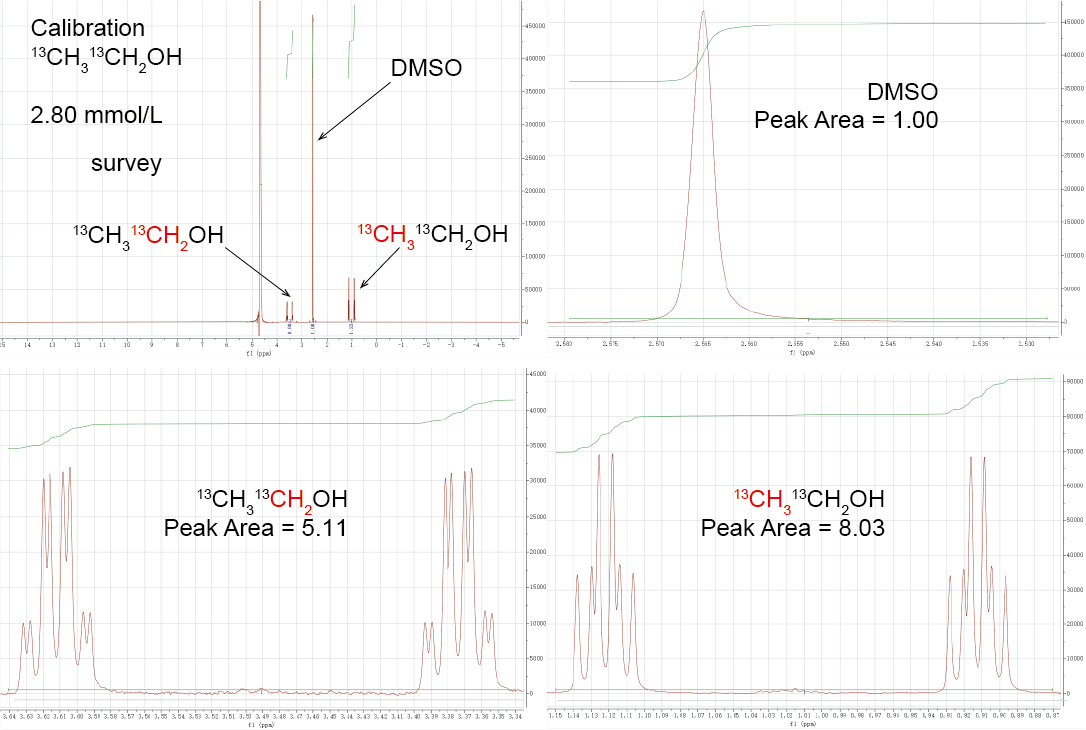


**Extended data Fig. 16 |** (**a**) The survey NMR spectrum of 2.80 mmol/L 13C labelled ethanol (13CH313CH2OH). The zoom in region of (**b**) DMSO, (**c**) CH2 and (**d**) CH3 with baseline and integrated peak area indicated.


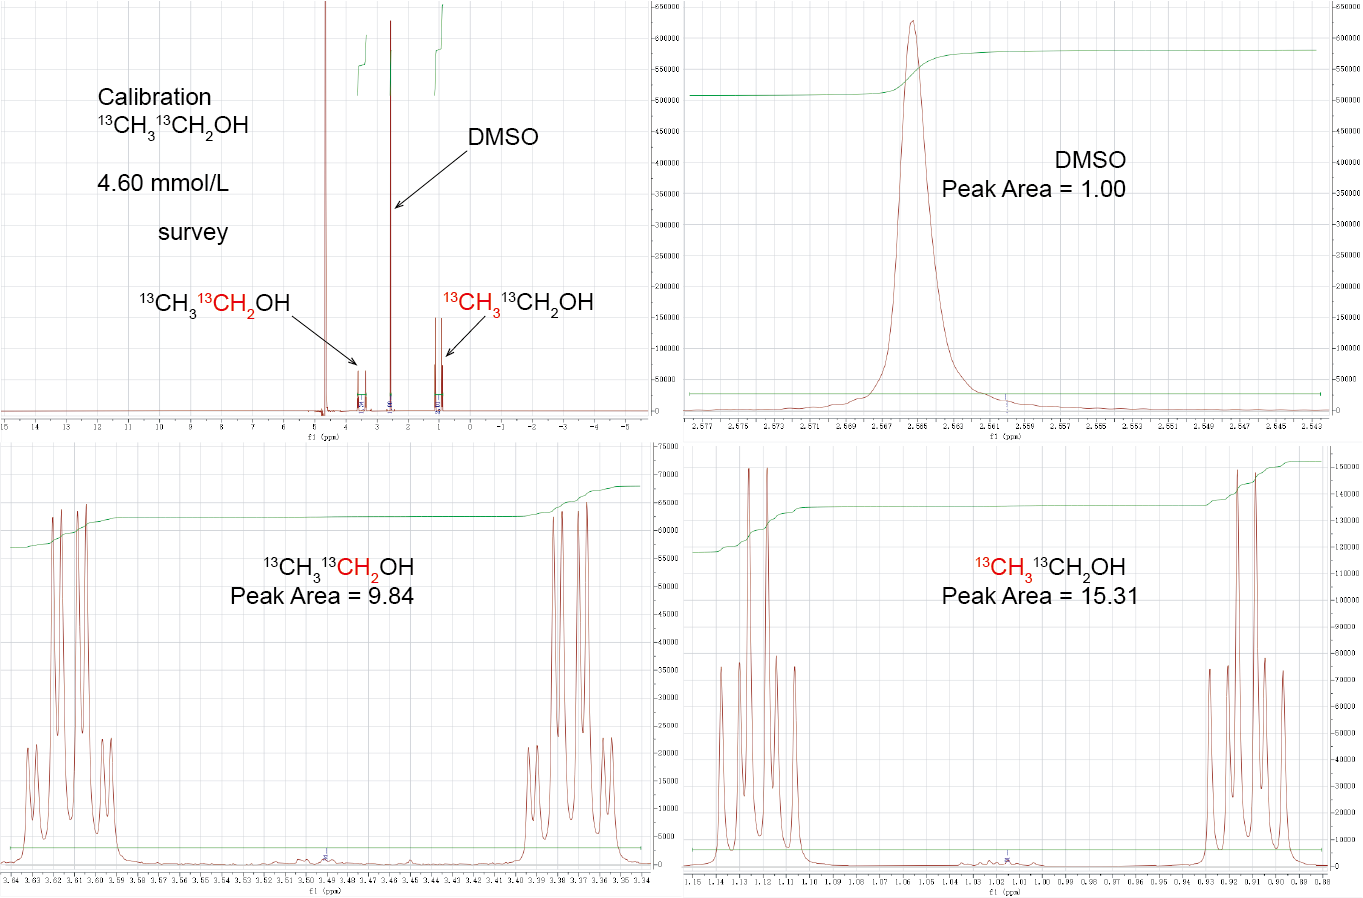


**Extended data Fig. 17 |** (**a**) The survey NMR spectrum of 4.60 mmol/L 13C labelled ethanol (13CH313CH2OH). The zoom in region of (**b**) DMSO, (**c**) CH2 and (**d**) CH3 with baseline and integrated peak area indicated.


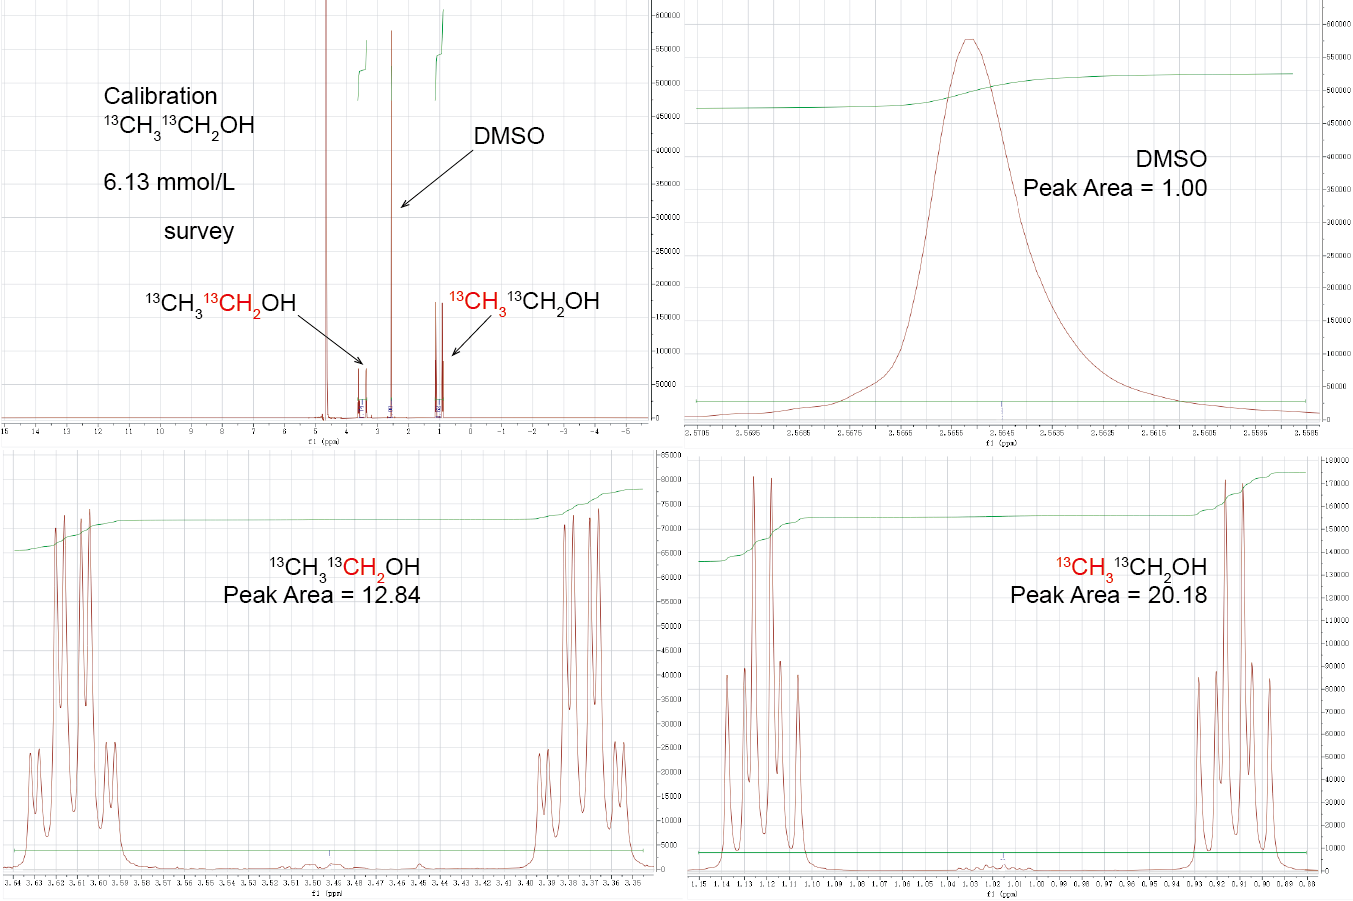


**Extended data Fig. 18 |** (**a**) The survey NMR spectrum of 6.13 mmol/L 13C labelled ethanol (13CH313CH2OH). The zoom in region of (**b**) DMSO, (**c**) CH2 and (**d**) CH3 with baseline and integrated peak area indicated.


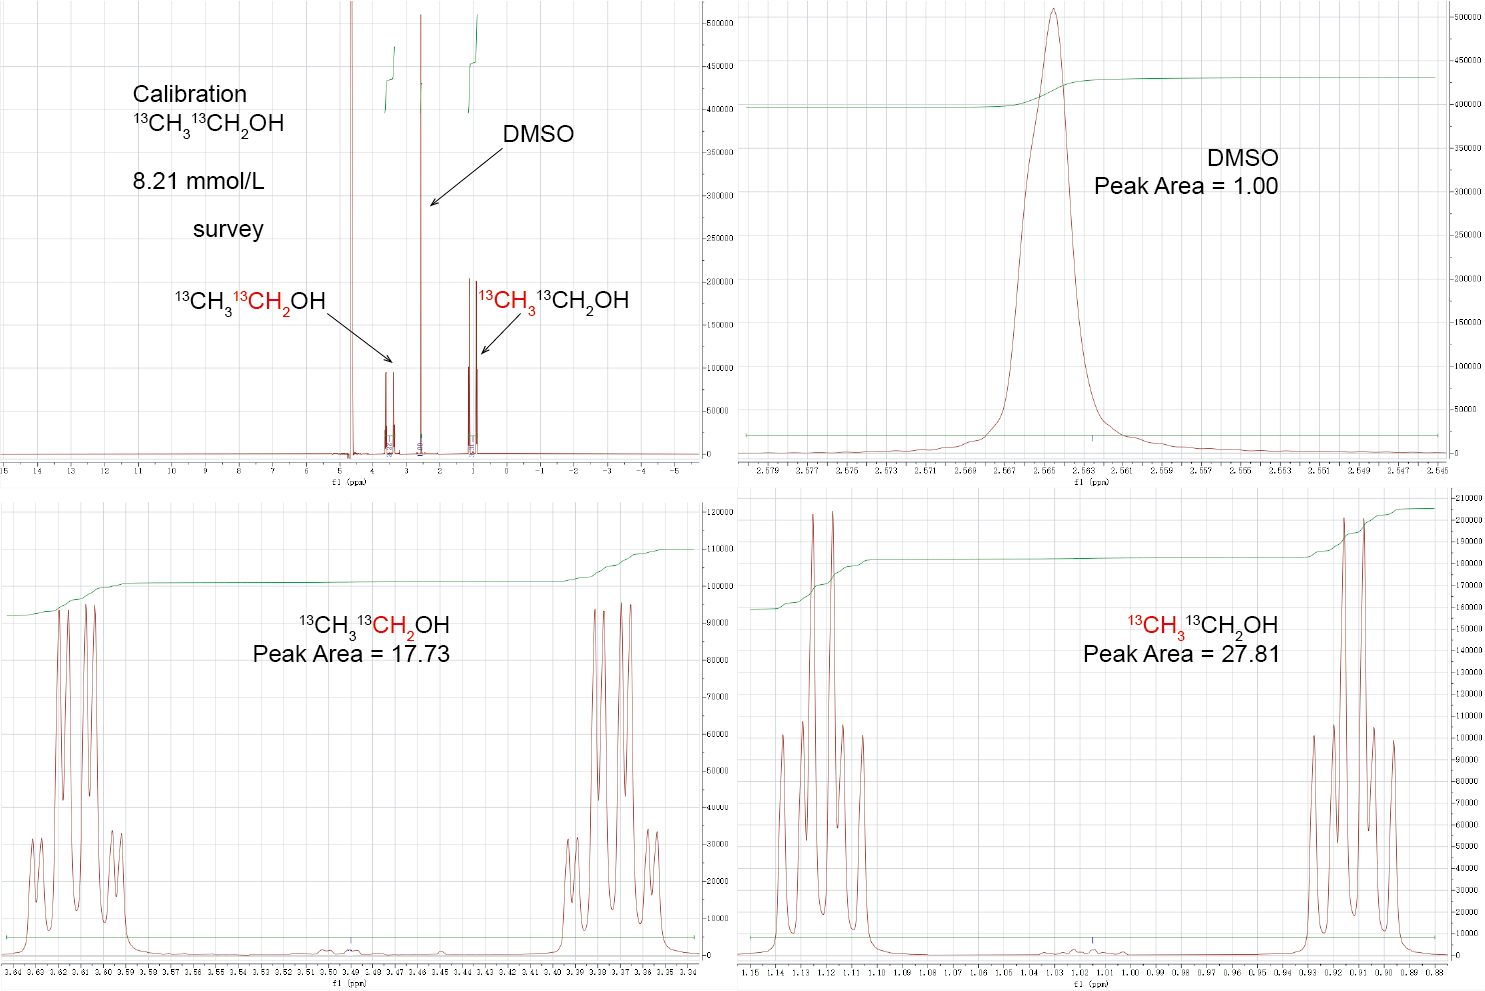


**Extended data Fig. 19 |** (**a**) The survey NMR spectrum of 8.21 mmol/L 13C labelled ethanol (13CH313CH2OH). The zoom in region of (**b**) DMSO, (**c**) CH2 and (**d**) CH3 with baseline and integrated peak area indicated.


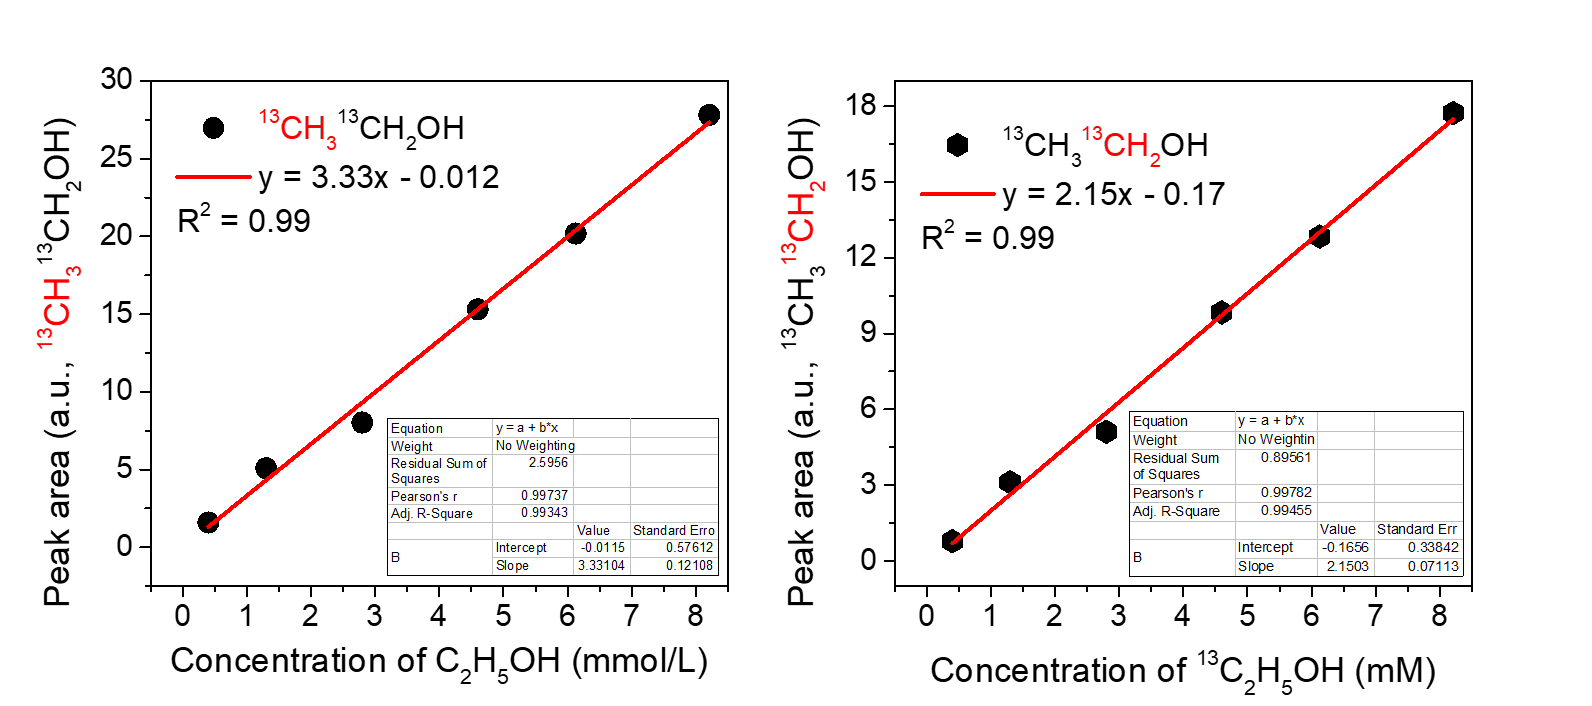


**Extended data Fig. 20 |** Calibration curves based on the area of the 13CH3 and 13CH2 peak in the NMR spectra.

**Extended data Table 3.** The concentration of ethanol determined based on calibration curves of 13CH3 and 13CH2.

|  | y = 3.33x – 0.012 (13CH3CH2OH) | | | y = 2.15x - 0.17 (CH313CH2OH) | | |
| --- | --- | --- | --- | --- | --- | --- |
|  | AC | A | CC | AC | A | CC |
| 1 | 0.52 | 1.62 | 0.49 | 0.52 | 1.01 | 0.55 |
| 2 | 1.68 | 5.72 | 1.72 | 1.68 | 3.38 | 1.65 |
| 3 | 3.20 | 10.88 | 3.27 | 3.20 | 6.62 | 3.16 |
| 4 | 5.80 | 18.14 | 5.45 | 5.80 | 12.41 | 5.85 |

AC represents the actual concentration (mmol/L), CC represents the calculated concentration according to the calibration equation (mmol/L), and A represents the integrated peak area of NMR spectrum.

The four control measurements were made on reference standards with concentration of 0.52, 1.68, 3.2 and 5.8 mmol/L.

**Extended data Table 4.** The uncertainties of calibration based on the peak area of 13CH3 and 13CH2.

|  | y = 0.41x + 0.04 (13CH3CH2OH) | y = 0.28x + 0.02 (CH313CH2OH) |
| --- | --- | --- |
|  | W = CC-AC (mmol/L) | W = CC-AC (mmol/L) |
| 1 | -0.03 | 0.03 |
| 2 | 0.04 | -0.03 |
| 3 | 0.07 | -0.04 |
| 4 | -0.05 | 0.05 |
| S | **0.028 mmol/L** | **0.022 mol/L** |

The calibration standard deviation based on the peak area of 13CH3 and 13CH2 is 0.028 and 0.022 mmol/L, respectively.

The electrolyte solution after the CO2RR (20 mL) was mixed with 50 µL of internal standard 99.99% dimethyl sulfoxide (DMSO) and 0.2 mL of D2O. Then 0.5 mL of the solution was sent for the 1H NMR measurement.

The Faradaic efficiency (FE) of each liquid product was calculated by:

where peak area of DMSO is 1, concentration of DMSO is 0.035 mol/L; Q = I × t, in which I (in amperes) is the reduction current at a specific applied potential and t is the reaction time (in seconds) for constant current reduction.

To study the C-C coupling reaction mechanism, a 0.5 M potassium bicarbonate aqueous solution (20 mL) was used as the electrolyte for CO2RR with addition of 50 µL HCOOH. A 0.5 M sodium sulfate aqueous solution (25 mL) was also used as the electrolyte for CO2RR with addition of different quantity of HCOOH to study the influence of HCOOH.

We further conducted isotope labeling experiments to study the intermediates involved in the CO2RR. The concentrations of ethanol produced using isotopically labelled 13CO2 as the reactant were determined by the calibration curve (Extended data Fig. 20), in which the standards were constructed using the 13C isotopically labelled ethanol (13CH313CH2OH). Moreover, the uncertainties of calibration were calculated, they are 0.028 and 0.022 mmol/L for calibrations based on the peak area of 13CH3 and 13CH2, respectively. A 0.5 M potassium bicarbonate aqueous solution (20 mL) was used as the electrolyte; a mass flow controller was used to control the 12CO2 (13CO2) flow rate at 20 sccm for CO2RR with addition of 50 µL of H13COOH (H12COOH).

***X-ray absorption spectroscopy***

X-ray absorption spectroscopy (XAS) was collected by employing synchrotron radiation light source at BL14W1 beamline of Shanghai Synchrotron Radiation Facility (SSRF) at room temperature. Energy calibration was performed with a tin foil standard by shifting all spectra to a glitch in the incident intensity. Fluorescence spectra were recorded using a seven-element Ge solid state detector. Extended X-ray absorption fine structure (EXAFS) spectra were fitted using the FEFF 8.2 code and the structure parameters of Sn1-O3G was obtained from the DFT calculation. The K-edge X-ray absorption spectra of C and O were measured in total electron yield mode (TEY-XAS) at room temperature using BL-20A at the National Synchrotron Radiation Research Center (Hsinchu, Taiwan).

***Theoretical and computational methods***

All density functional theory (DFT) calculations were performed using the Vienna Ab-initio Simulation Package (VASP) *2,3*. The electron exchange and correlation energy were treated within the generalized gradient approximation (GGA) in the Perdew-Burke-Ernzerhof scheme (PBE) *4*. The interaction between ions and electrons was described by the projector augmented wave (PAW) method. To examine the effect of van der Waals interaction on reaction energetics, calculations were performed using the DFT-D3 functional with PBE-PAW potentials *5,6*. Iterative solutions of the Kohn-Sham equations were expanded in a plane-wave basis sets defined by a kinetic energy cutoff of 400 eV, and the Brillouin zone was sampled using a 2 × 2 × 1 Monkhorst-Pack grid. The convergence criteria for the electronic self-consistent iteration and force were set to 10-5 eV and 0.02 eV/Å, respectively. A vacuum region of 15 Å was set between the periodically repeated slabs to avoid artificial interactions.

The adsorption energies (Eads) were calculated according to the equation,

Eads = E(adsorbate/substrate) -[E(substrate) + E(adsorbate)]

where E(adsorbate/substrate), E(substrate) and E(adsorbate) represent the total energy of substrate with adsorbed species, the clean substrate and the molecule in the gas phase, respectively. Each electrochemical reaction step of CO2 reduction involves a (H+ + e-) pair transfer from the adsorbed species on the surface to the electrolyte. The energy change of each (H+ + e-) pair transfer reaction was calculated using the computational hydrogen electrode (CHE) method developed by Nørskov et al *6,7*. The free energy (Δ*G*0) was calculated by:

Δ*G*0 = Δ*E* + ΔZPE + Δ0→298KΔ*H* – *T*Δ*S*

The reaction enthalpy (Δ*H*) of an elementary step was estimated by the reaction energy Δ*E* from DFT calculations with zero-point energy (ZPE) correction and enthalpy correction (Δ0→298KΔ*H*); *T*Δ*S* is the change in entropy contribution to the free energy. The enthalpy and entropy of the ideal gas were taken from the standard thermodynamic tables.

Extended data figures:


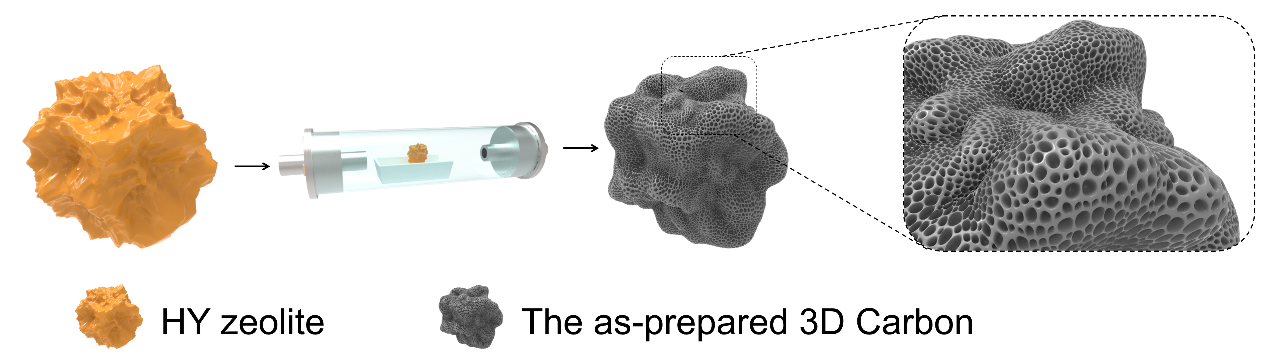


**Extended data Fig. 21 ǀ** A schematic illustration showing the procedure to prepare 3D carbon.


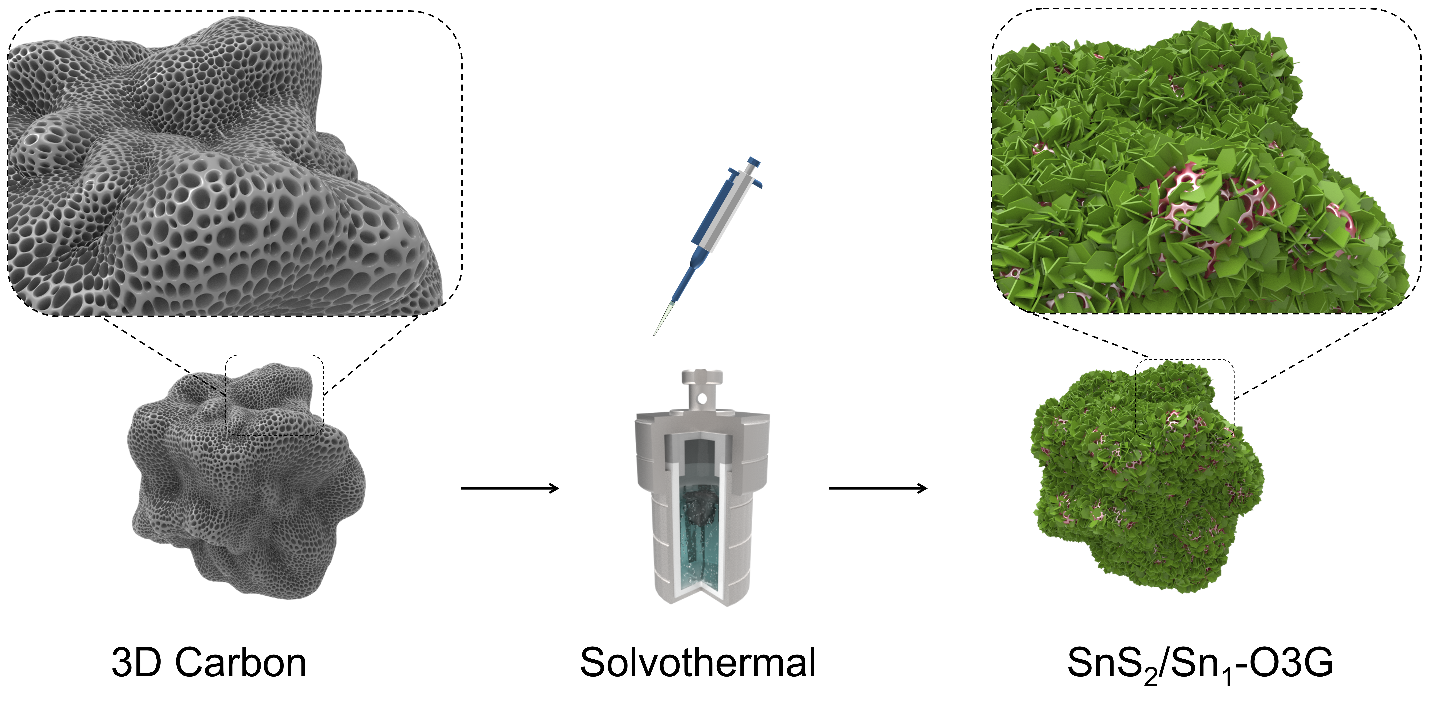


**Extended data Fig. 22 |** A schematic illustration showing the procedure to prepare SnS2/Sn1-O3G.


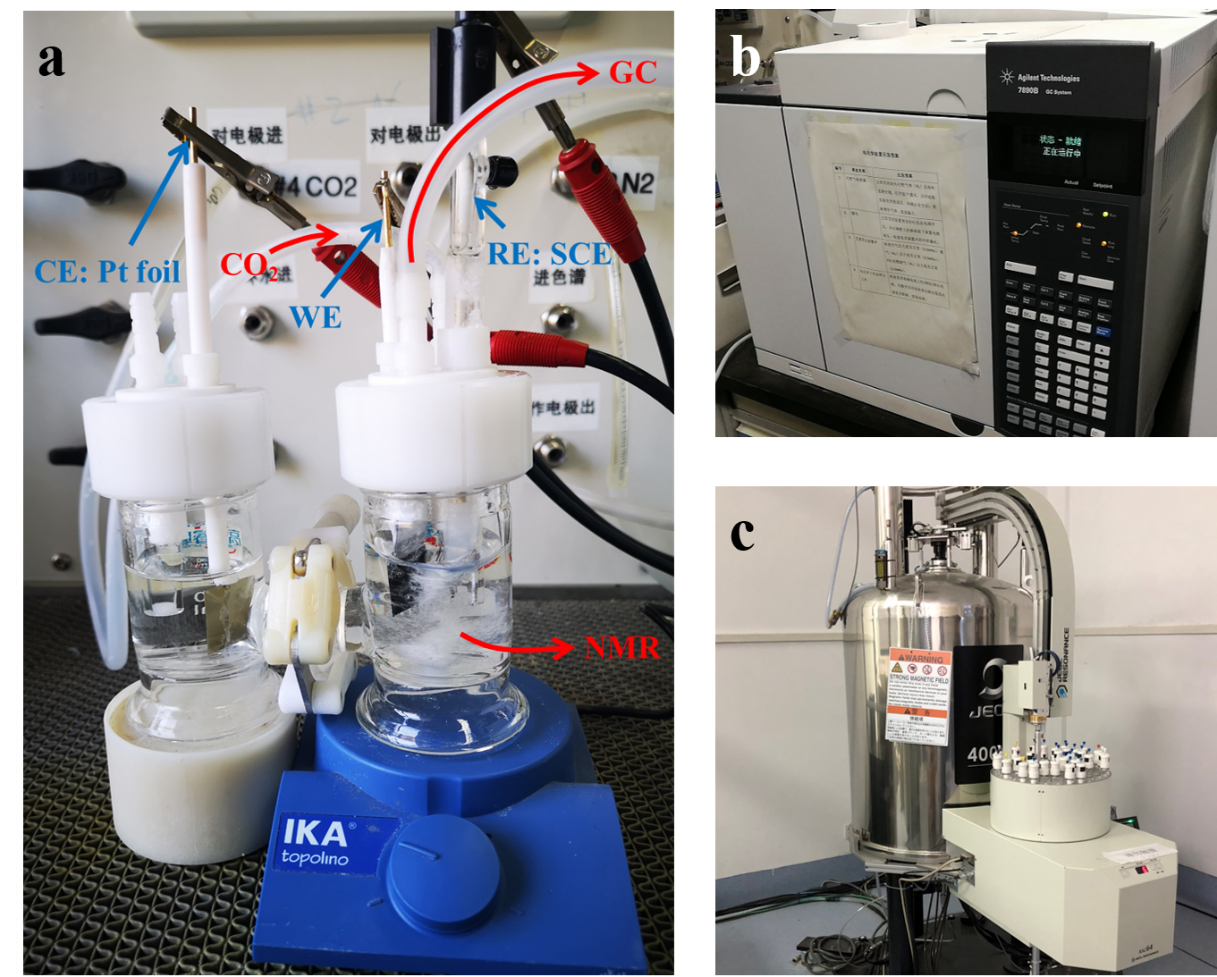


**Extended data Fig. 23 |** Electrochemical CO2RR setup. (**a**) A H-type electrochemical cell used for CO2RR. WE: working electrode, CE: counter electrode, and RE: reference electrode. (**b**) GC used to quantity the gas phase products, and (**c**) NMR used to quantify the liquid products.


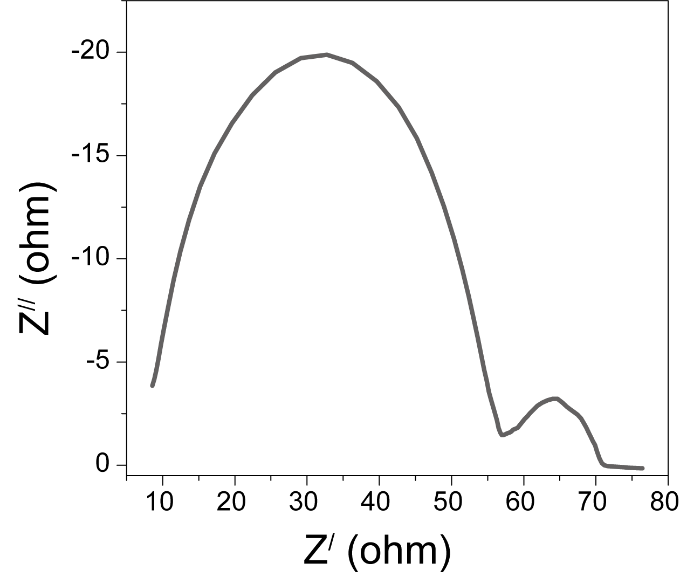


**Extended data Fig. 24 |** The EIS spectrum of SnS2/Sn1-O3G.


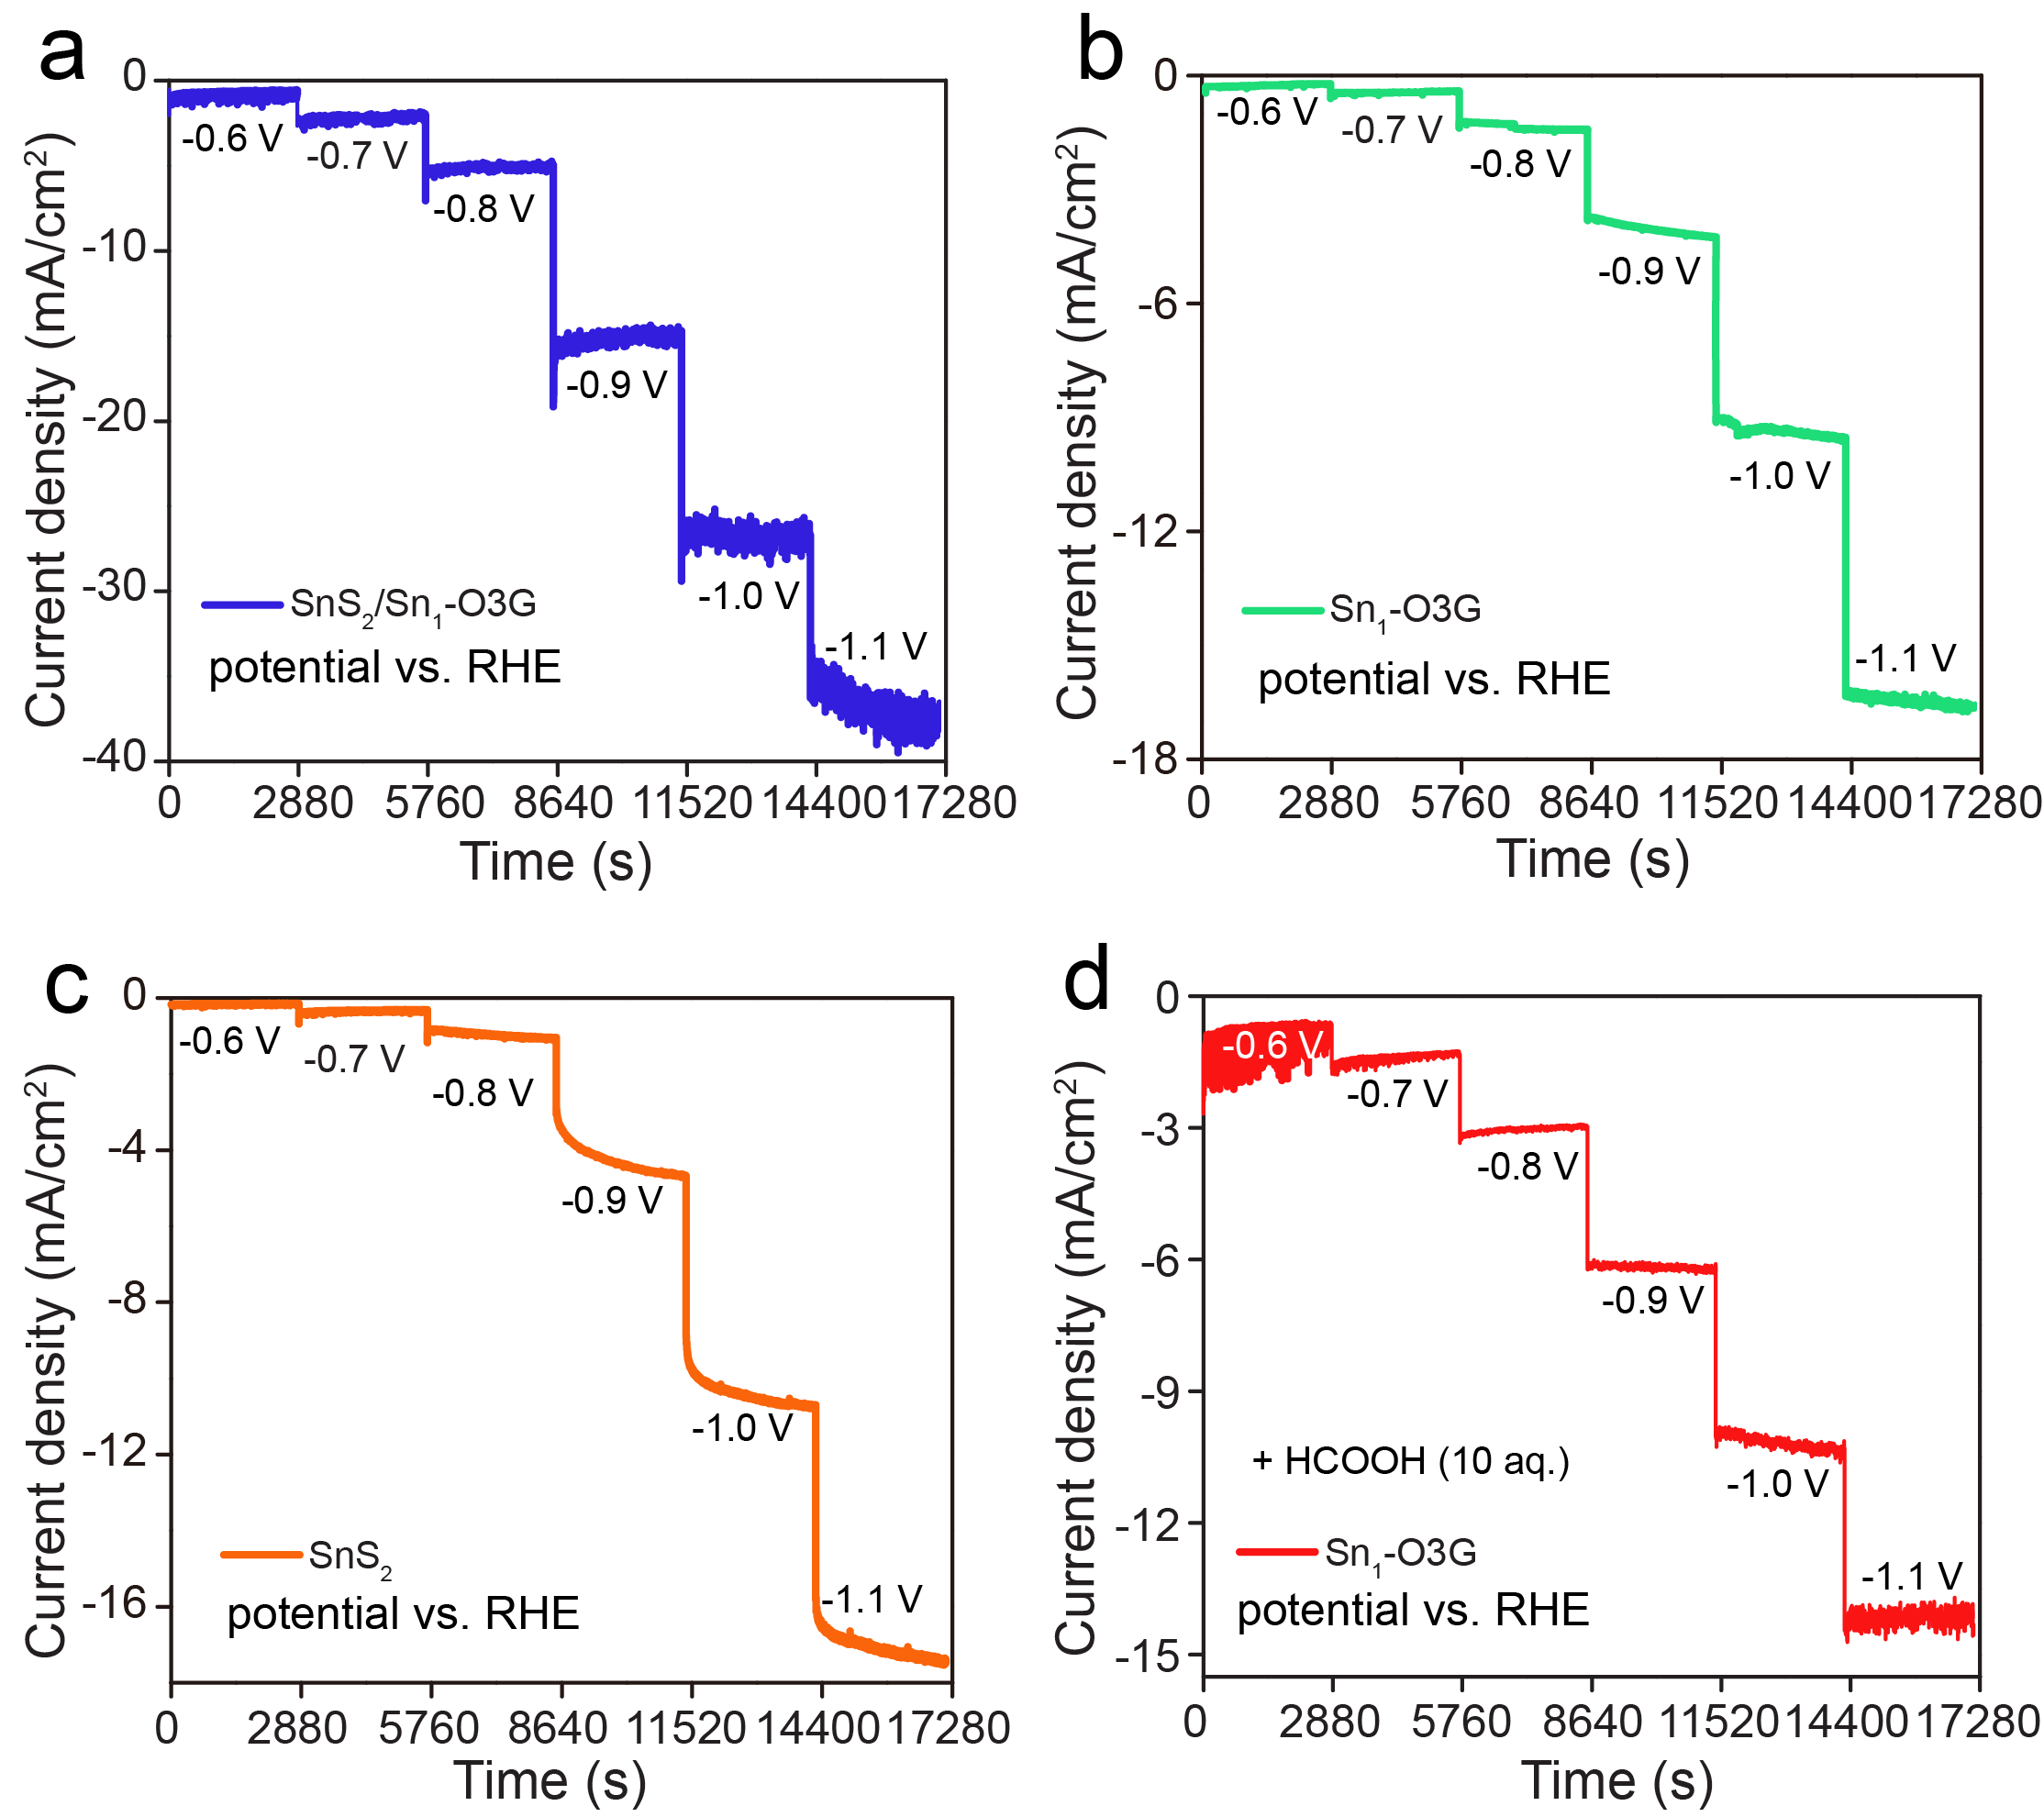


**Extended data Fig. 25 |** Chronoamperometric curve of (**a**) SnS2/Sn1-O3G, (b) Sn1-O3G, and (**c**) SnS2 electrode under bias from -0.6 to -1.1 V versus RHE in 0.5 M CO2-saturated KHCO3 aqueous solution. (**d**) Chronoamperometric curve of Sn1-O3G with adding HCOOH.


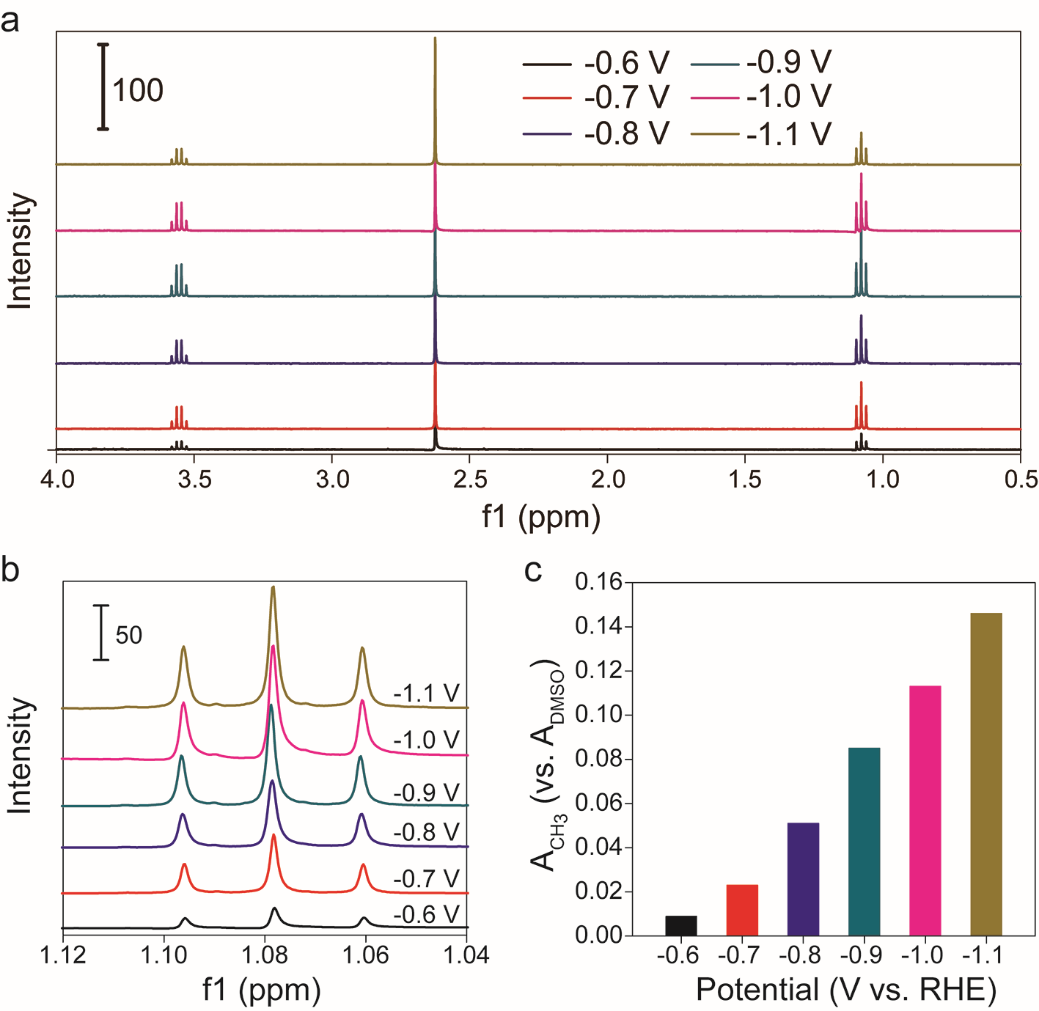


**Extended data Fig. 26 |** (**a**) NMR spectra of the electrolyte solution after 5 hours of CO2RR at -0.6 to -1.1 V (vs. RHE) for SnS2/Sn1-O3G, **(b)** NMR spectra showing the CH3 peaks and **(c)** the integrated peak area of CH3 peaks.

**
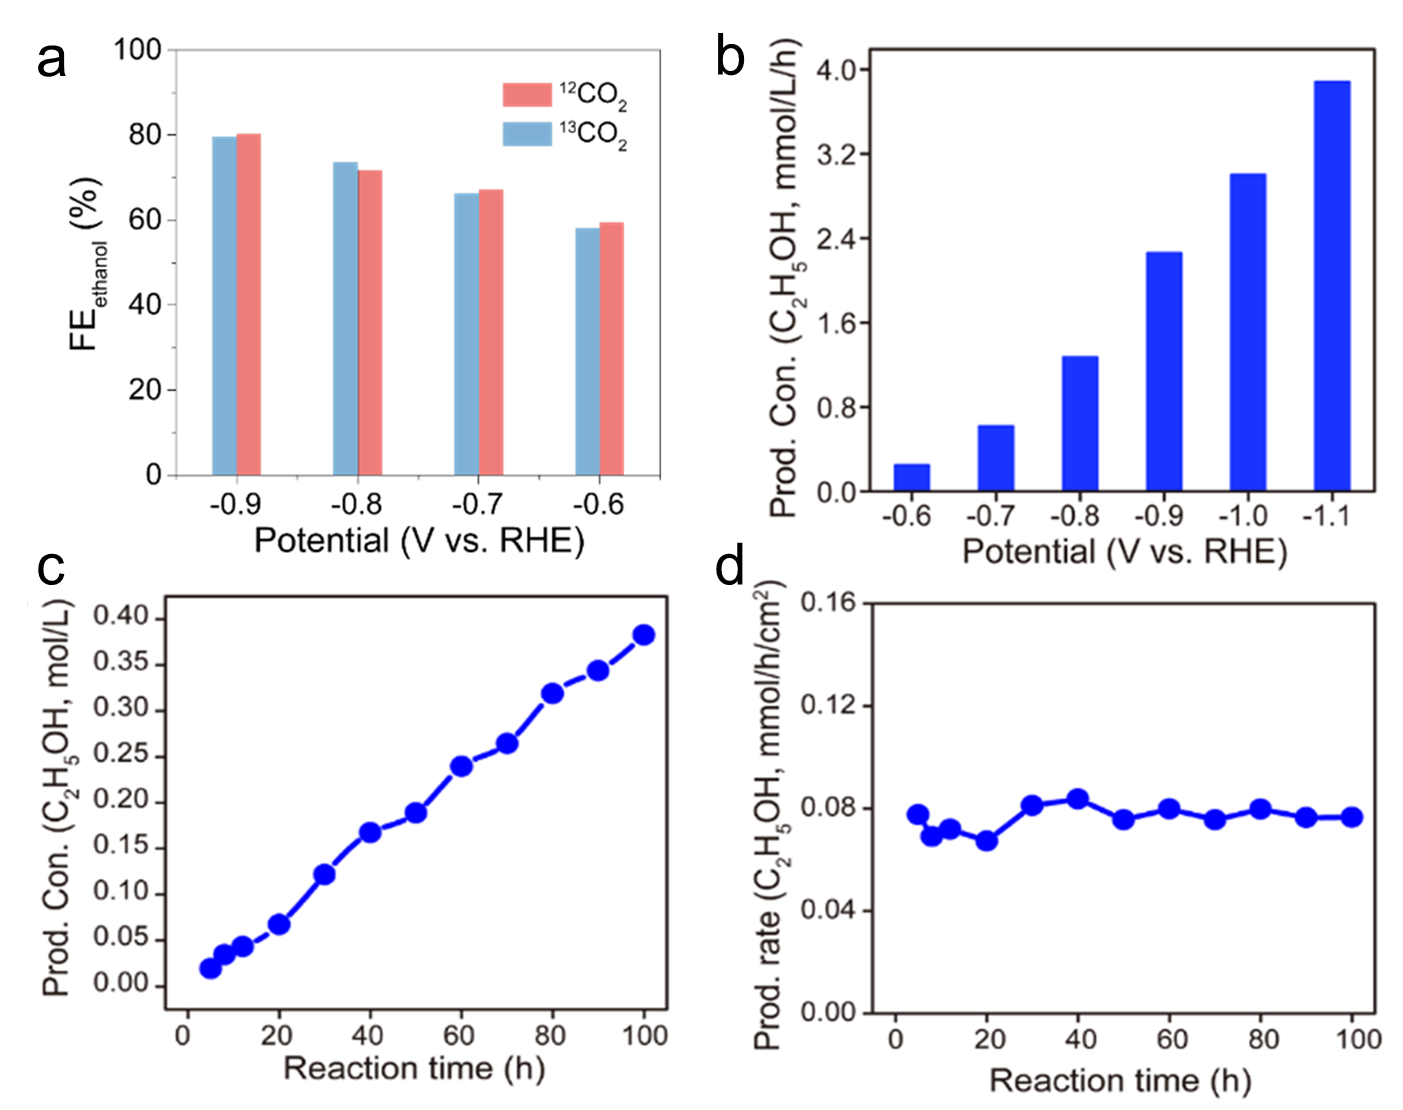
**

**Extended data Fig. 27 |** (**a**) Comparison of Faradaic efficiency of ethanol with 13CO2 and 12CO2 as the reactant. (**b**) Concentration of ethanol produced at various applied cathodic potentials in the H-type cell for SnS2/Sn1-O3G. (c) Rate, and (d) specific rate (normalized to geometric electrode area) of ethanol produced at -0.9 V (vs. RHE) in the H-type cell for SnS2/Sn1-O3G in 100 h. All measurements were performed at 1 atm CO2 and room temperature in 0.5 M KHCO3 (pH = 7.3). Electrode area: 1 cm2 and volume of cathodic electrolyte: 20 ml.


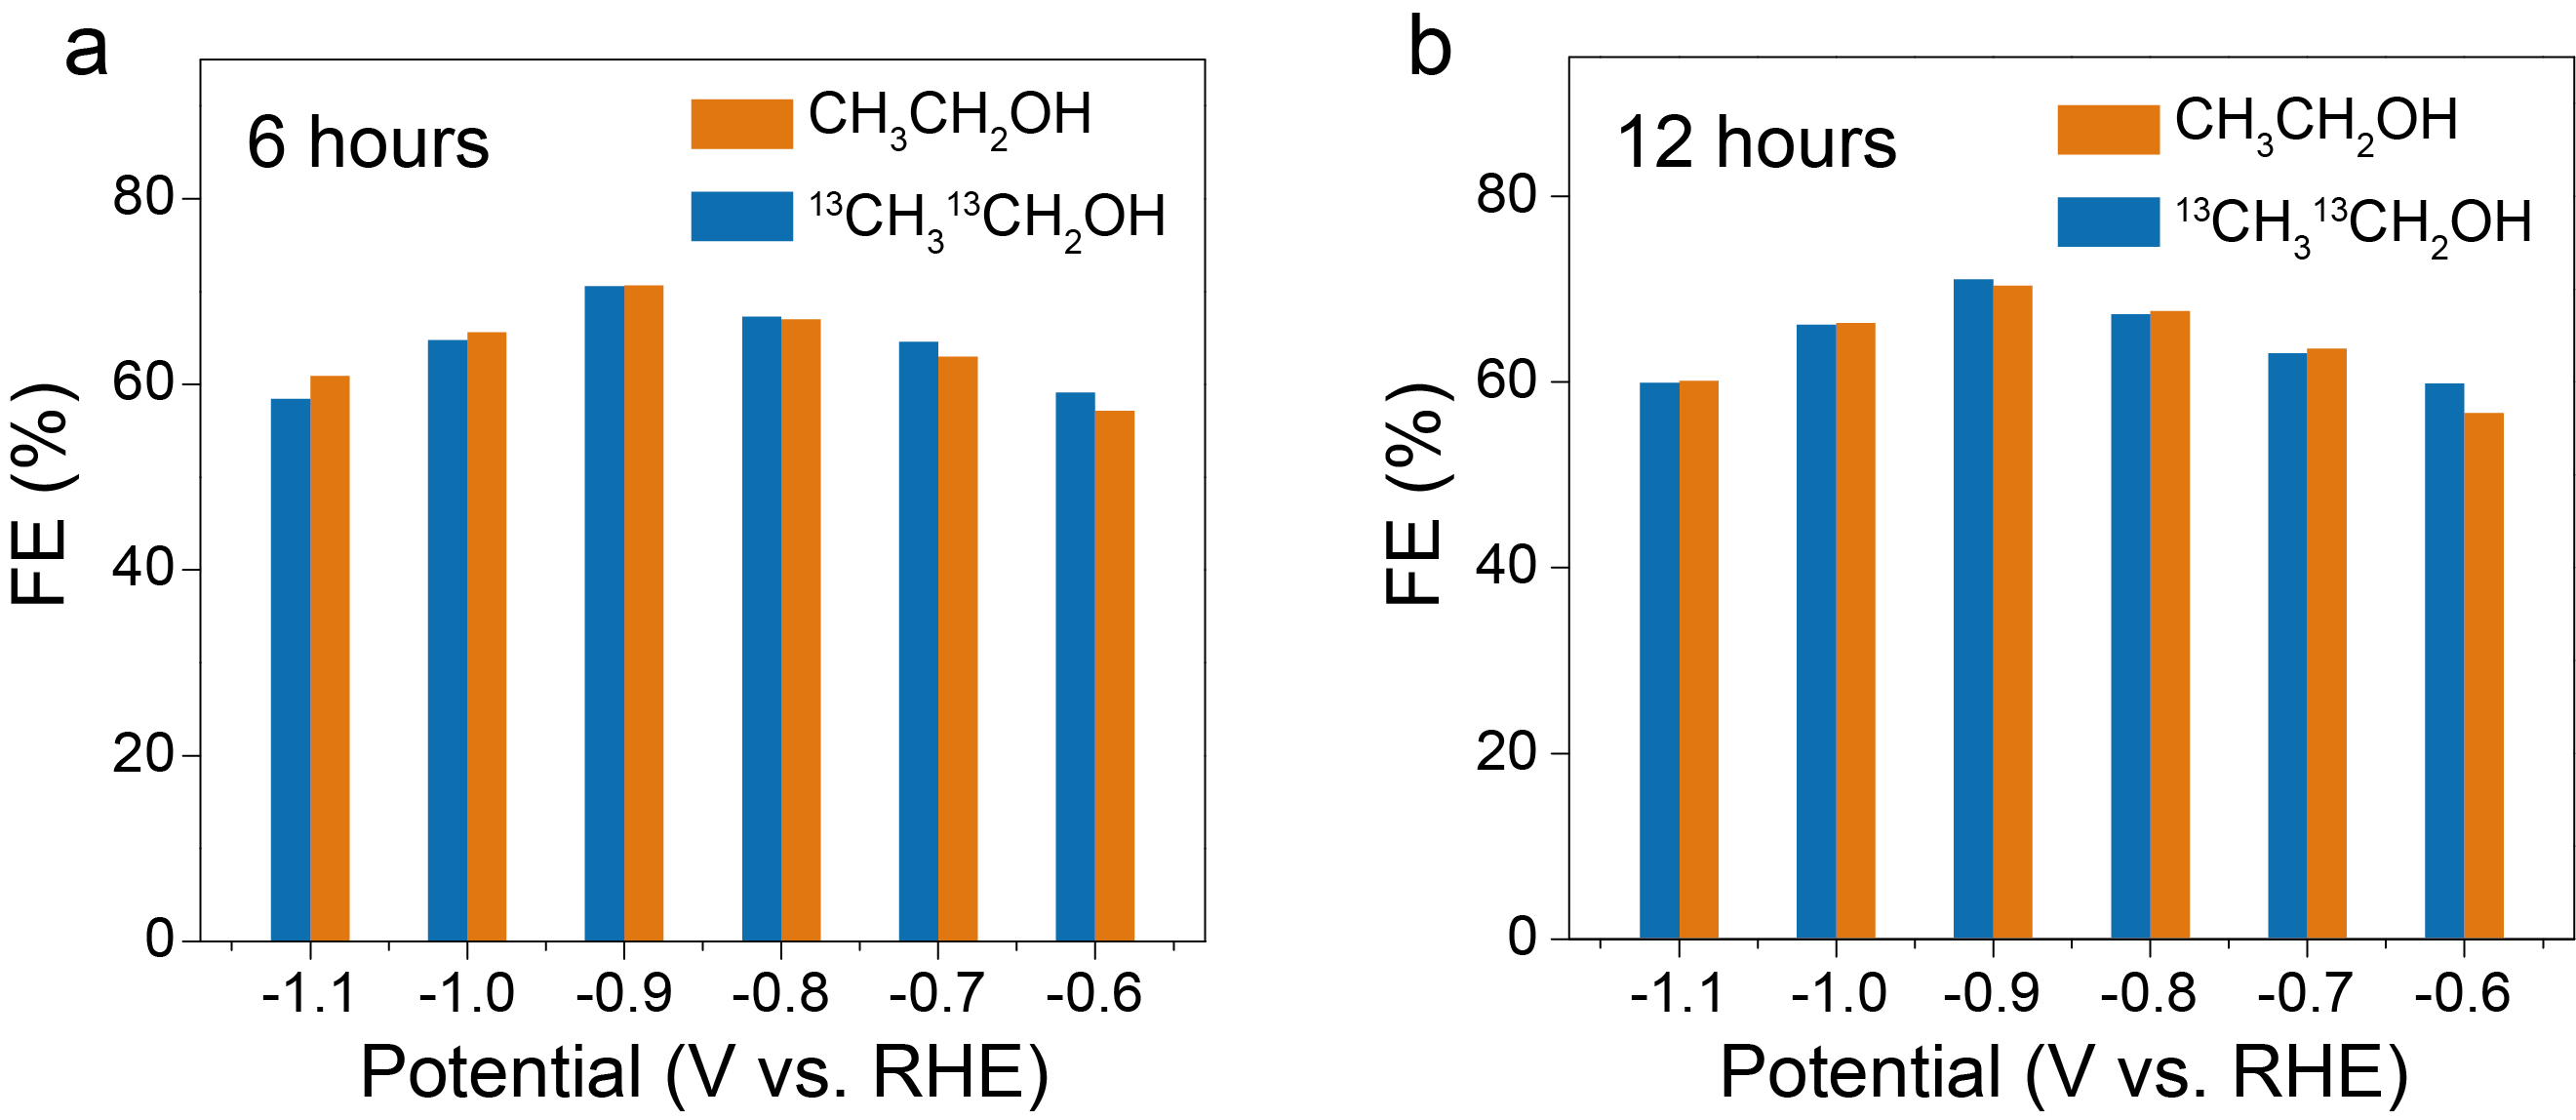


**Extended data Fig. 28 |** (**a**) Comparison of Faradaic efficiency of ethanol with 13CO2 and 12CO2 as the reactant after 6 hours of reaction at different applied potentials. (**b**) Comparison of Faradaic efficiency of ethanol with 13CO2 and 12CO2 as the reactant after 12 hours of reaction at different applied potentials. All measurements were performed at 1 atm CO2 and room temperature in CO2-saturated 0.5 M KHCO3 (CO2 + KOH → KHCO3) (pH = 7.3). Electrode area: 1 cm2 and volume of cathodic electrolyte: 20 ml.


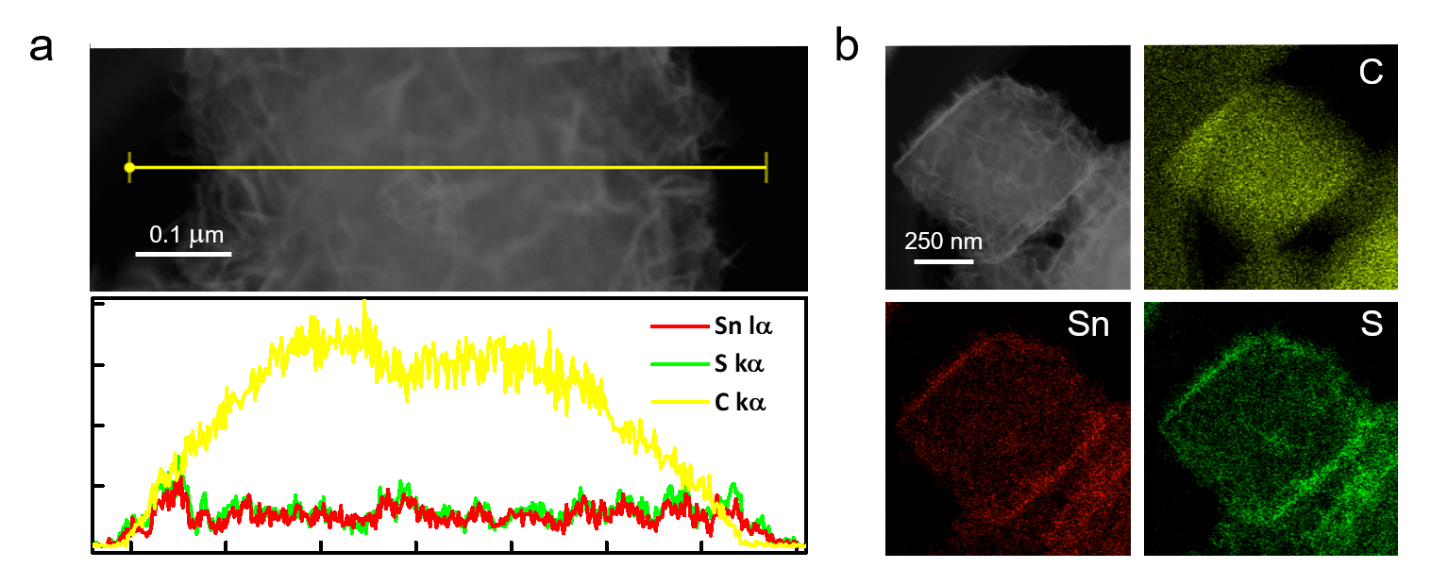


**Extended data Fig. 29 |** (**a**) Transmission electron microscopy image and the corresponding line-scan TEM-EDX elemental analysis, and (**b**) elemental mapping of the SnS2/Sn1-O3G.


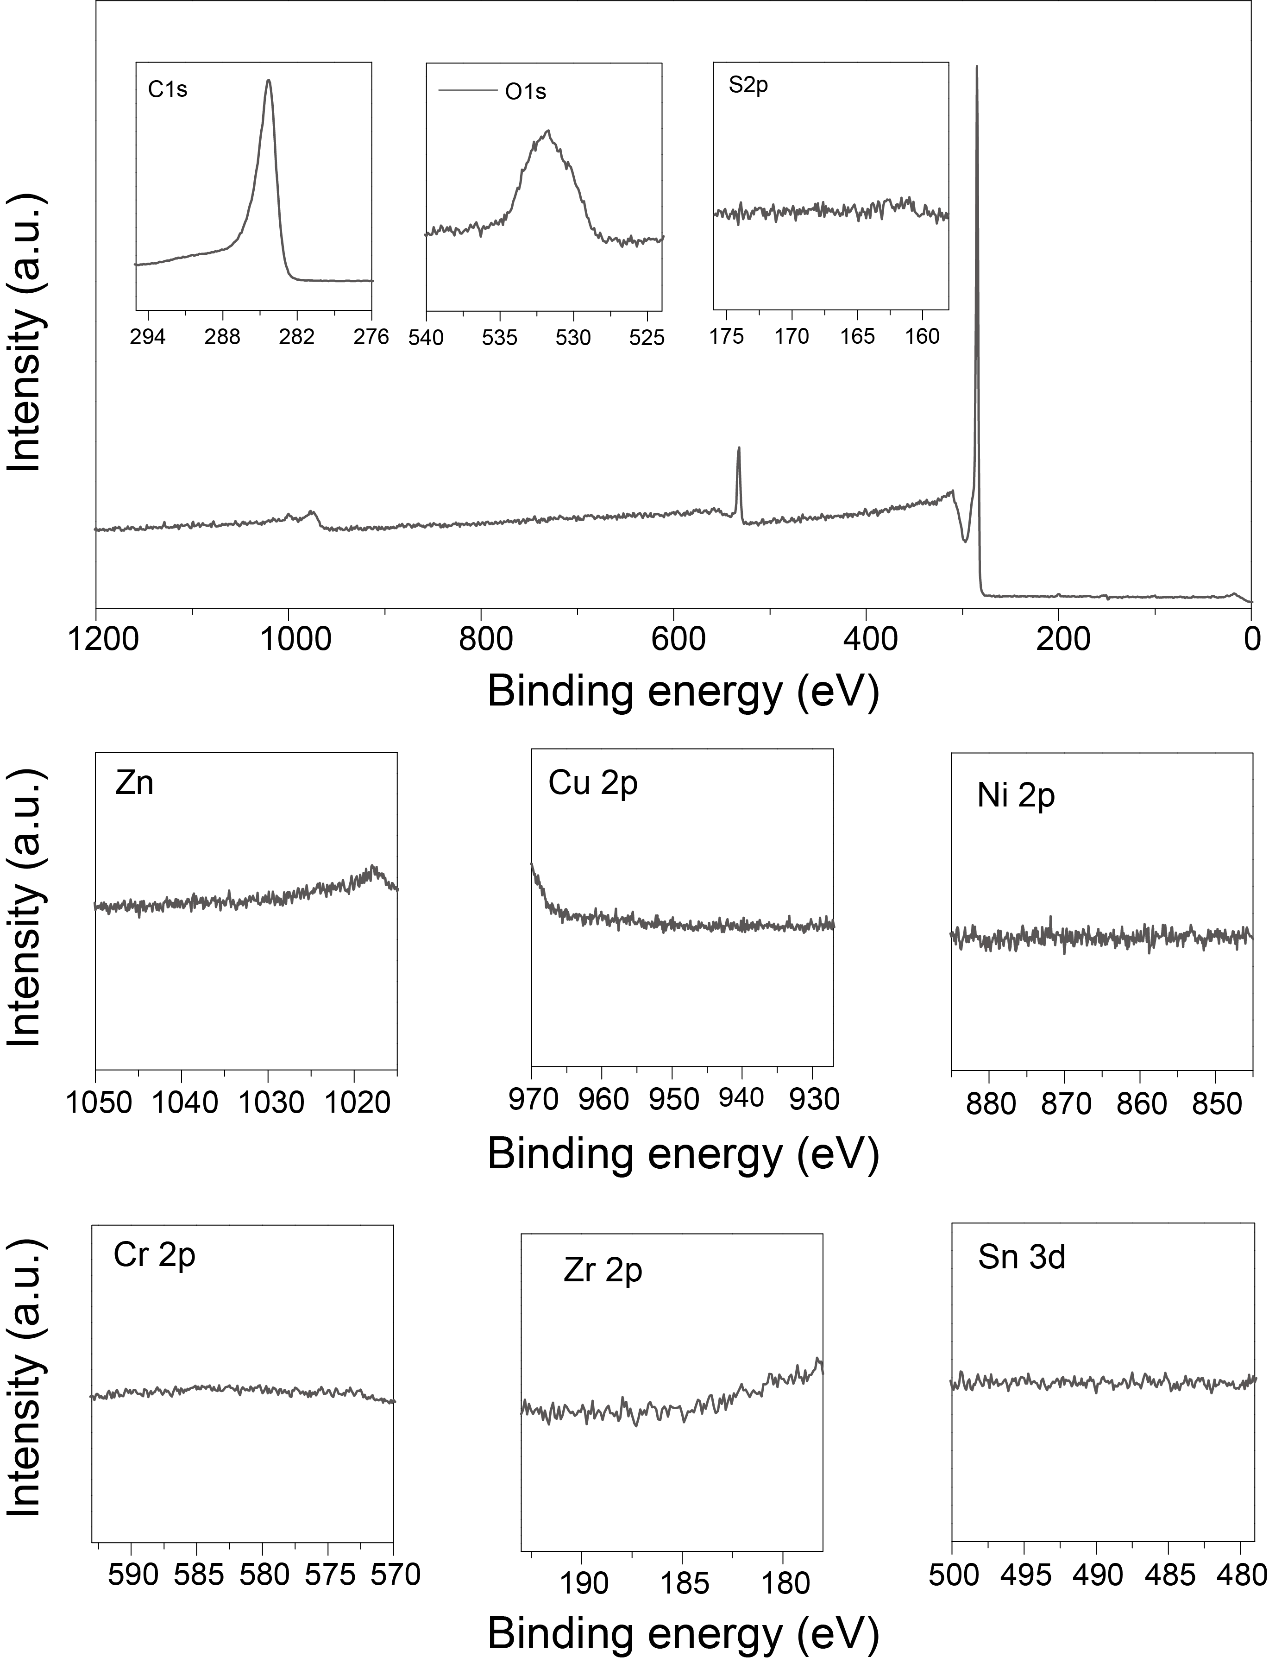


**Extended data Fig. 30 |** XPS spectra of 3D carbon to determine metal contamination.


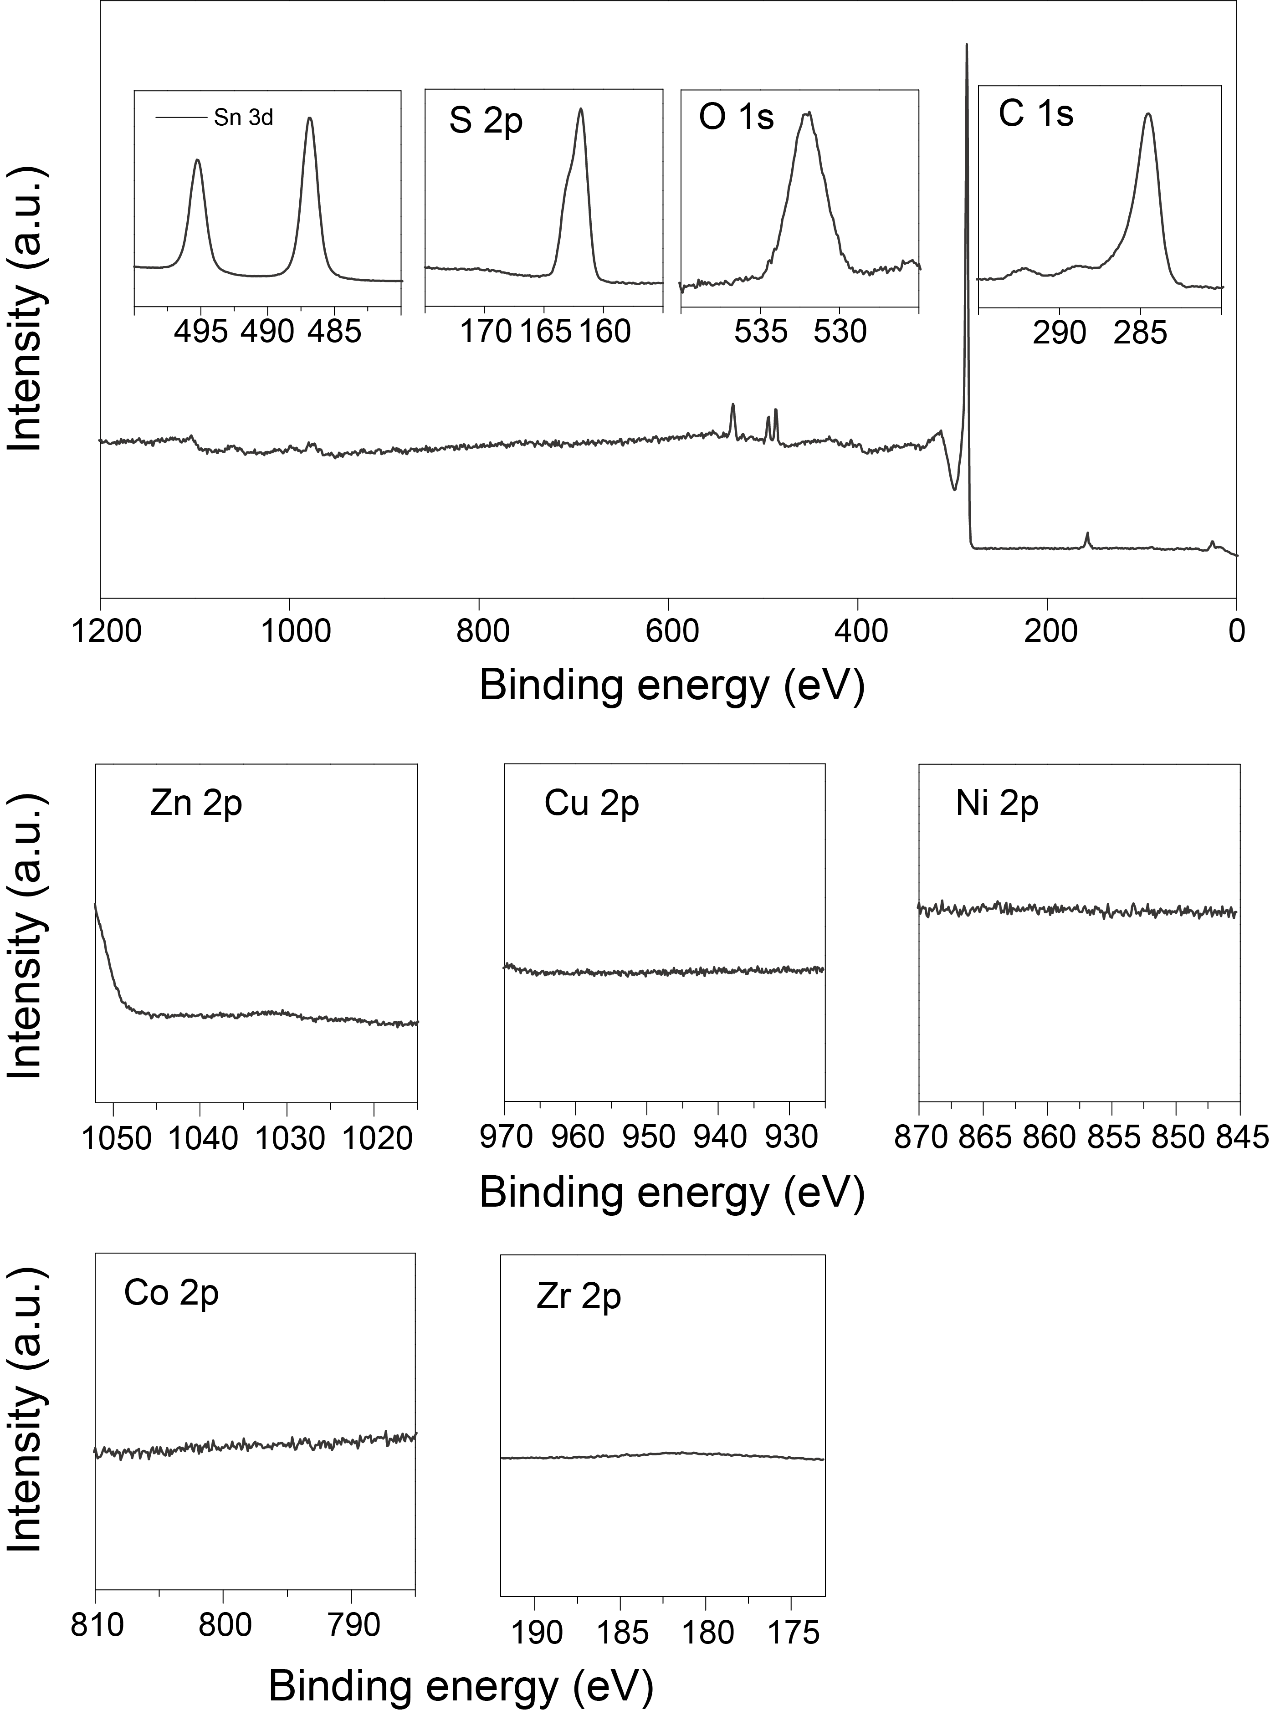


**Extended data Fig. 31 |** XPS spectra of SnS2/Sn1-O3G to determine metal contamination.

**
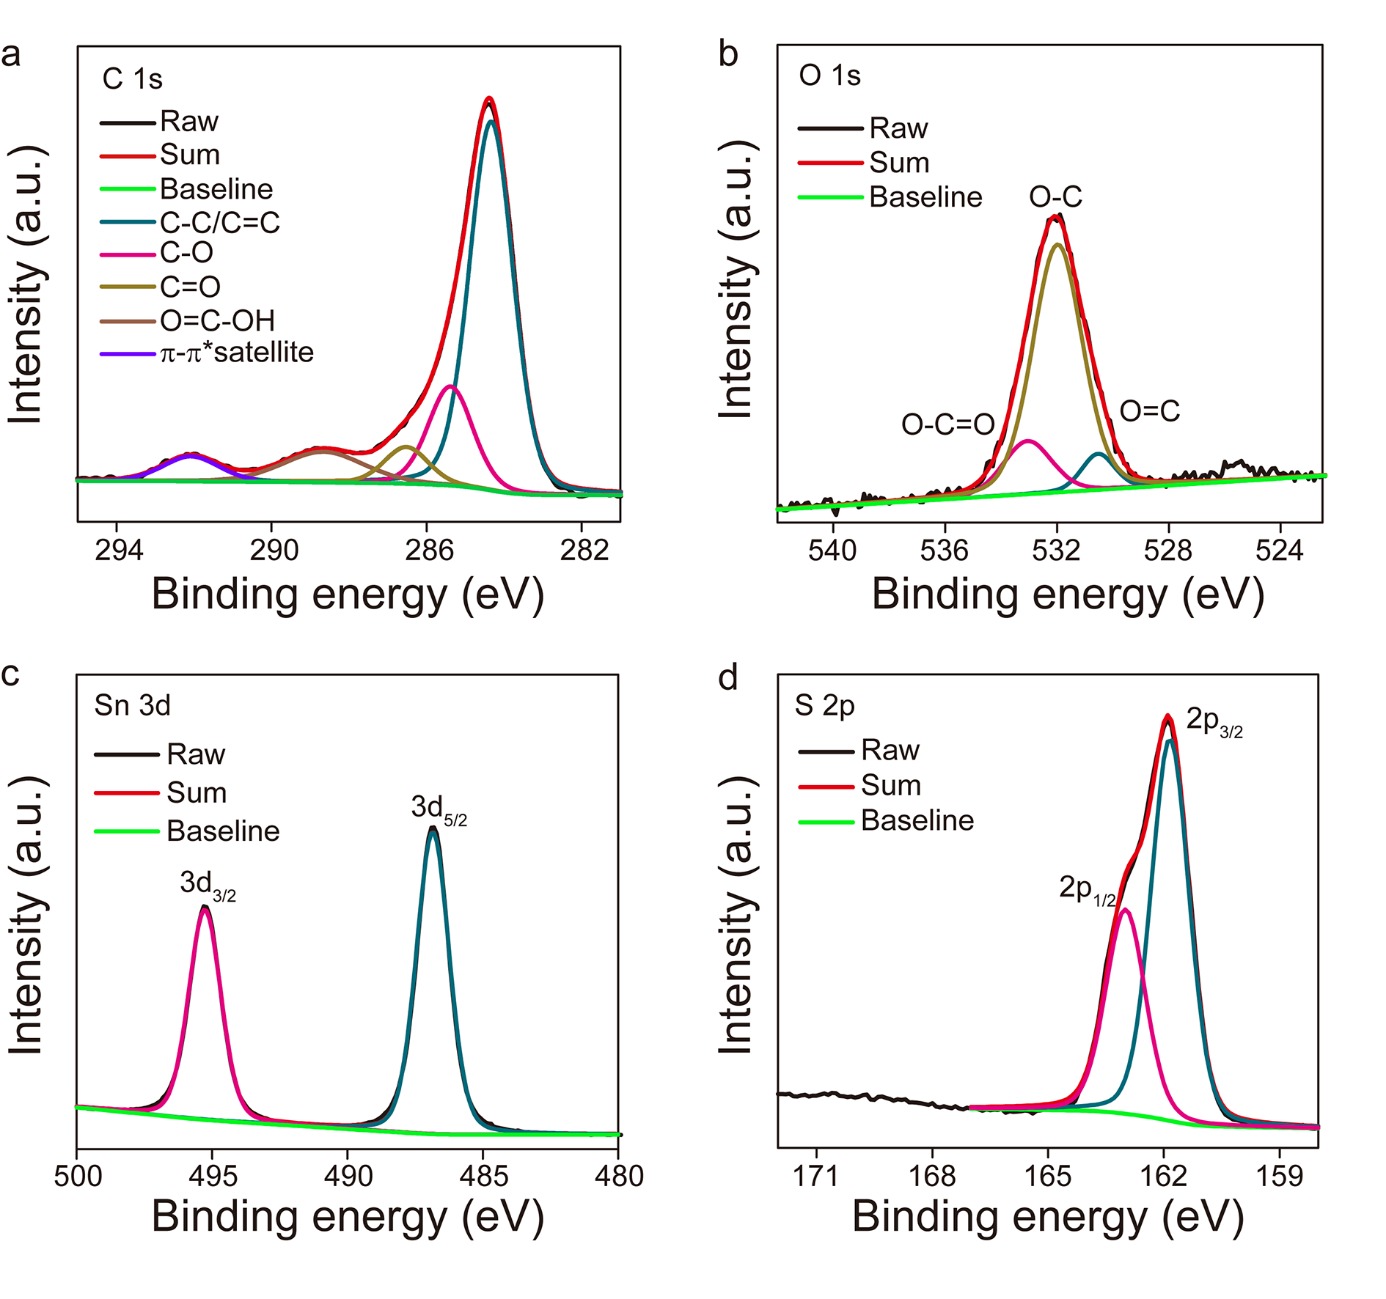
**

**Extended data Fig. 32 |** Sn 2p (**a**), S 2p (**b**), C 1s (**c**), and O 1s (**d**) XPS spectrum for SnS2/Sn1-O3G.

**Note:** The high-resolution C 1s XPS spectrum can be deconvoluted into three peaks. The most obvious peak is located at 284.6 eV, which can be assigned to the sp2-hydridized C-C/C=C bonds. The peaks in the binding energy ranges of 285.6-286.6 and 288.6-290.3 eV are ascribed to the C-O and C=O bonds. The O 1s XPS spectrum are deconvoluted into three peaks at 530.5, 532.0 and 533.1 eV, respectively, corresponding to O=C, O-C and O-C=O. Two peaks at 486.9 and 495.3 eV corresponding to Sn 3d5/2 and Sn 3d3/2 suggest Sn4+ in SnS2/Sn1-O3G. The peaks at 161.6 and 163.1 eV show the existence of SnS2 in SnS2/Sn1-O3G.

**
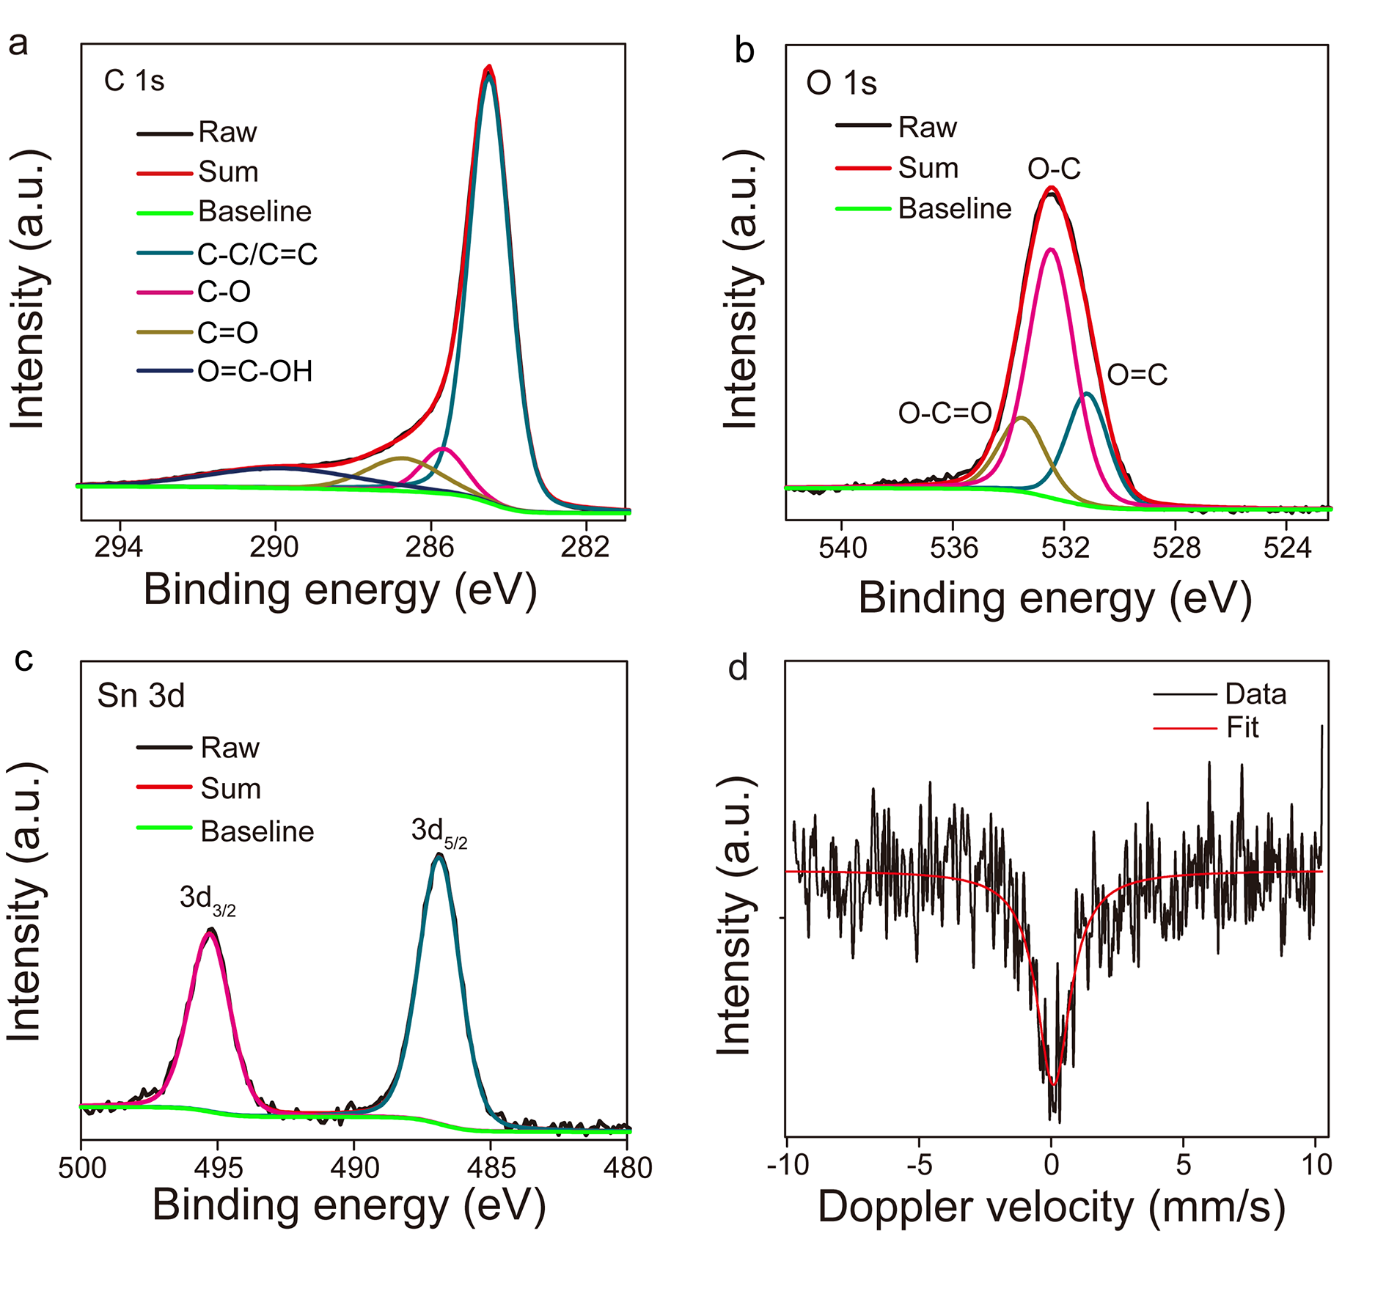
**

**Extended data Fig. 33 |** (**a-c**) XPS spectrum of C 1s, O 1s, and Sn 2p. (**d**) Mössbauer spectrum of Sn1-O3G.

**Note:** Mossbauer spectrum of Sn1-O3G shows a single peak with isomer shift of 0.088 mm s−1 and quadrupole splitting of 0.22 mm s−1, which agrees well with Sn4+ *8,9,10*, indicating that the valence state of Sn in Sn1-O3G is +4.


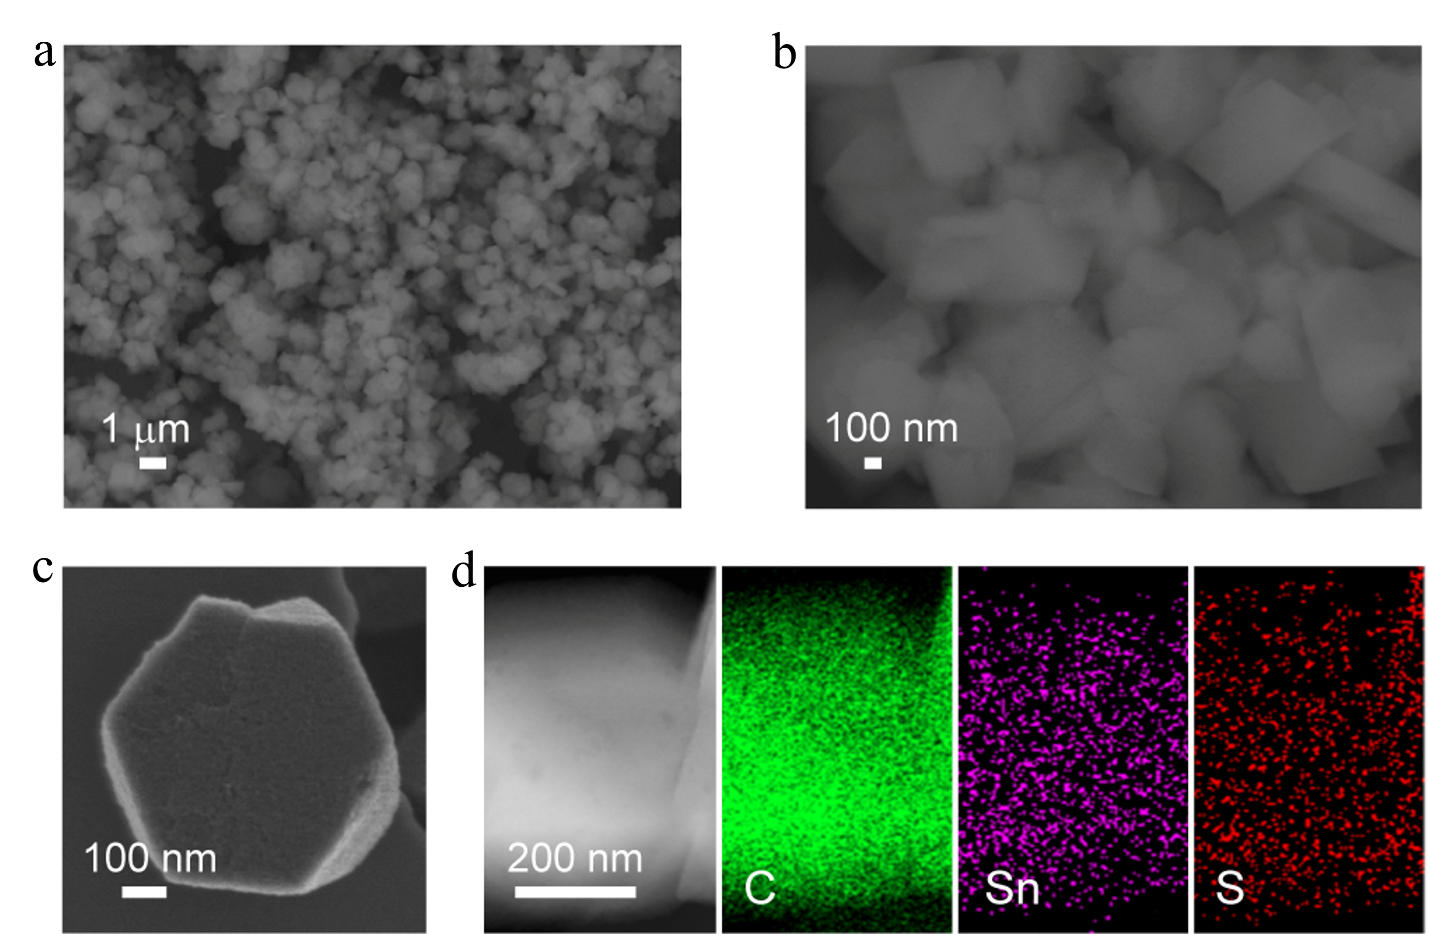


**Extended data Fig. 34 |** (**a-c**) SEM images. (**d**) STEM image and the corresponding elemental mappings for Sn1-O3G.


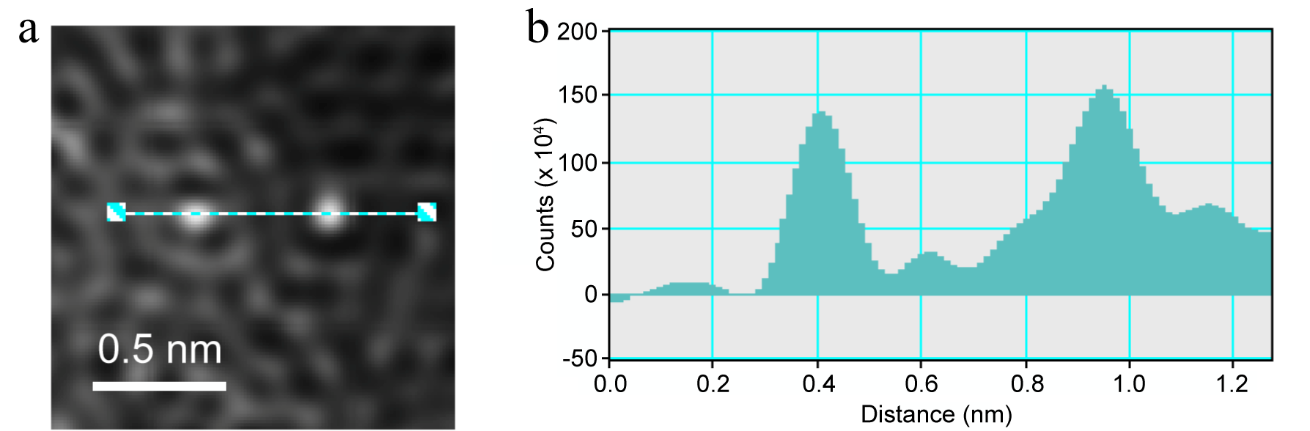


**Extended data Fig. 35 |** (**a**)HAADF-STEM image showing the atomic configuration of Sn atoms. (**b**) The corresponding line profile of Sn atoms as shown in (**a**).


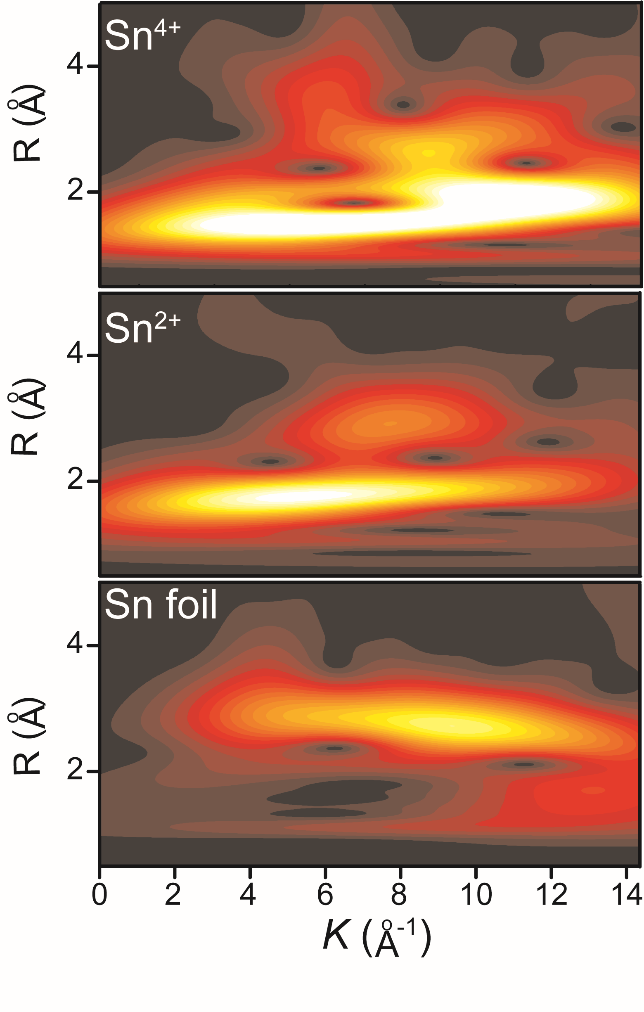


**Extended data Fig. 36 |** Wavelet transform of the *k3*-weighted EXAFS data of reference Sn foil, Sn2+ and Sn4+ samples.


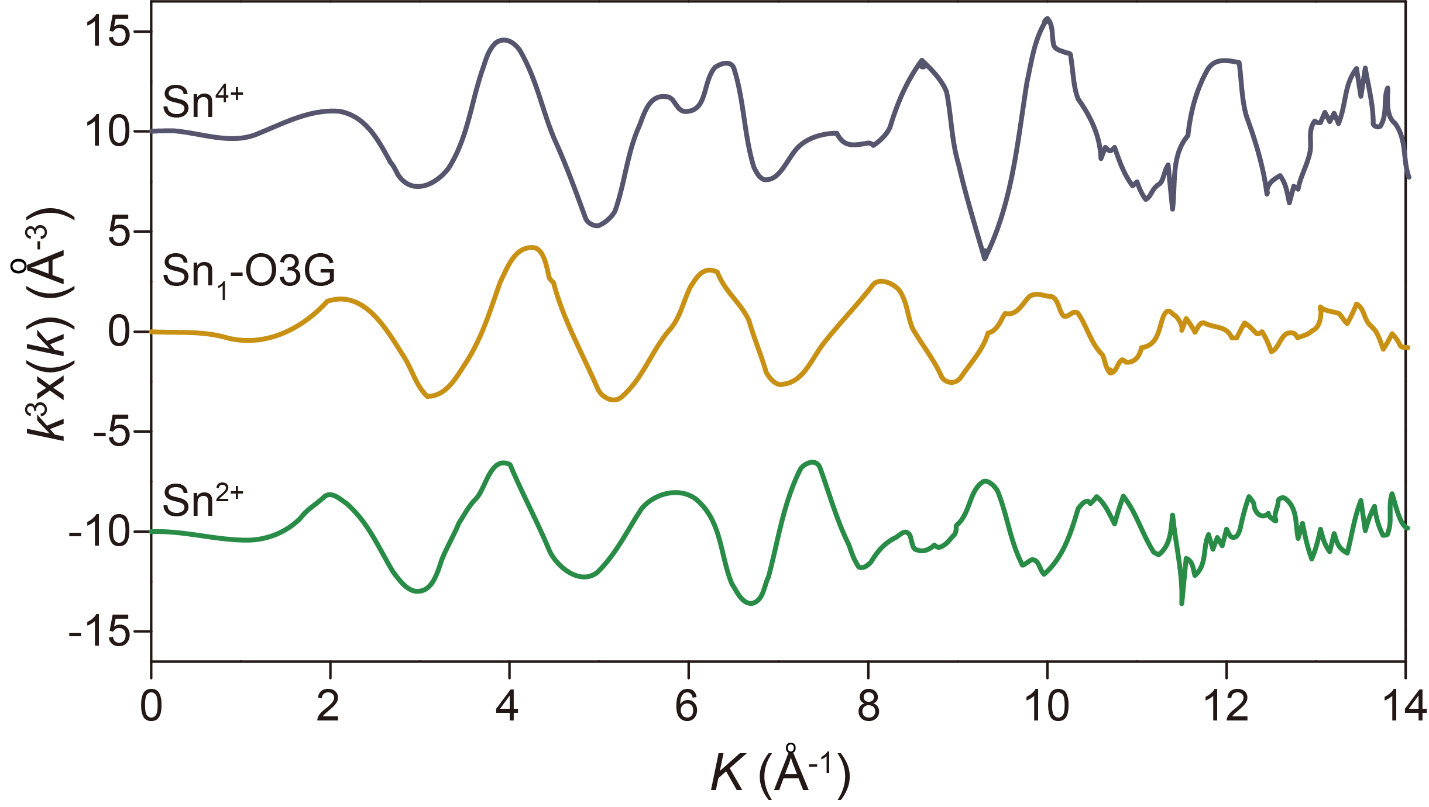


**Extended data Fig. 37 |** Sn2+, Sn4+ and Sn1-O3G in *k3*-weighted k-space spectra.


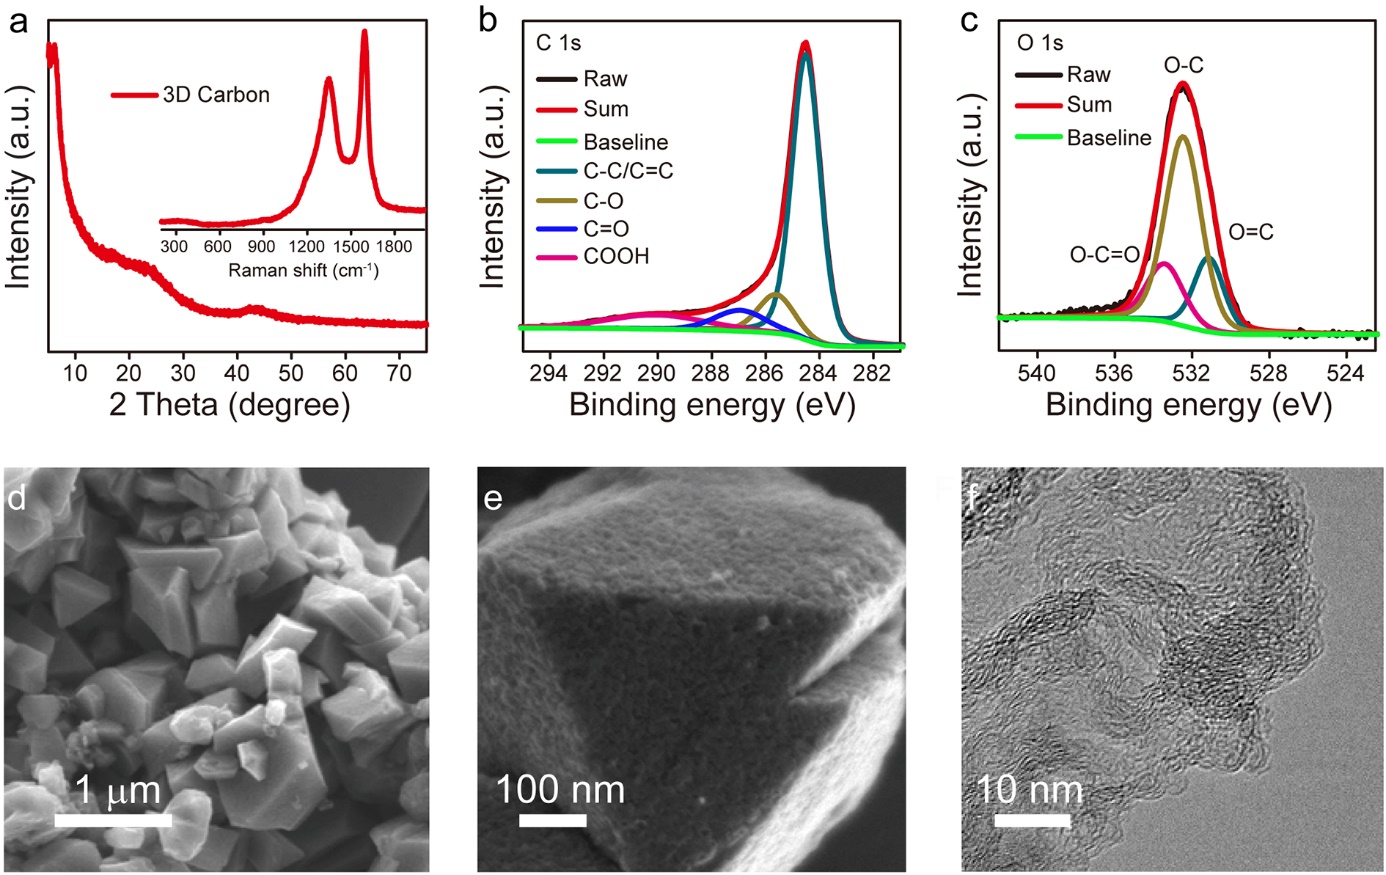


**Extended data Fig. 38 |** Characterization of the as-prepared 3D carbon. (**a**) XRD pattern and Raman spectrum (inset). High-resolution XPS spectrum of (**b**) C 1s and (**c**) O 1s. (**d, e**) SEM images and (**f**) TEM image.

**Note:** The as-prepared 3D carbon keeps the morphology of the HY zeolite, characterized by the graphitic-G band at ∼1350 cm−1 and the D band at ∼1580 cm−1 in the Raman spectrum. The high-resolution XPS spectrum of C 1s can be divided into four peaks, ascribed to the sp2 hybridized C-C/C=C, C-O, C=O and O-C=O bonds, respectively. High-resolution O 1s XPS spectrum confirms presence of O-C, O=C and O-C-O groups on surface of 3D carbon.


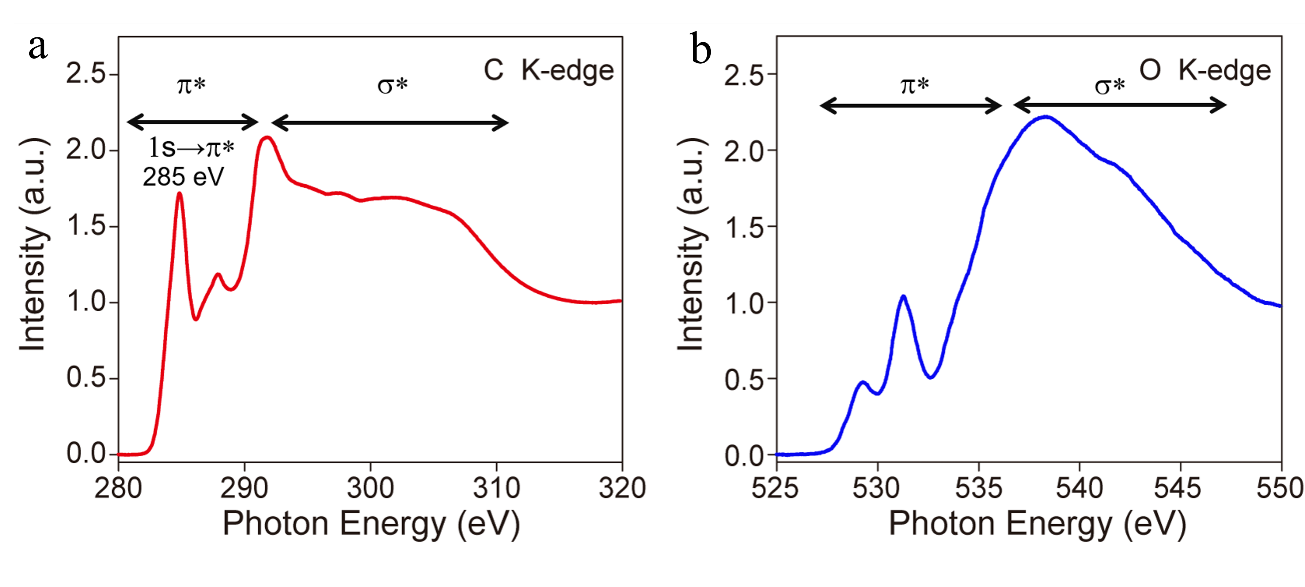


**Extended data Fig. 39 |** Carbon and oxygen K-edge XANES spectra of Sn1-O3G.


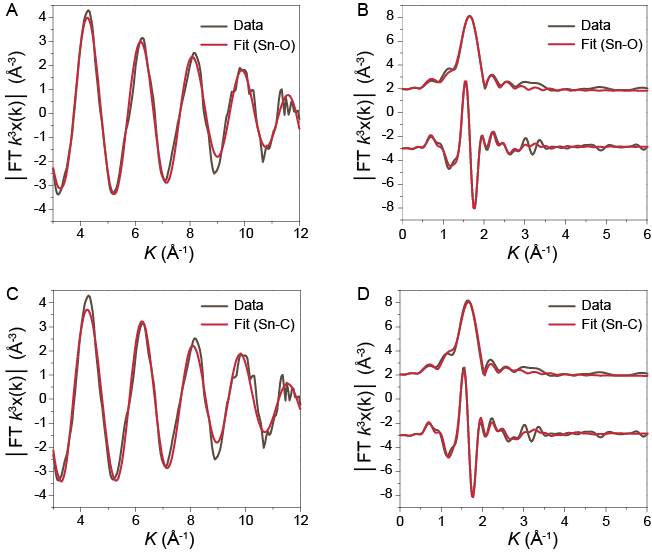


**Extended data Fig. 40 |** First-shell fitting of the Fourier transformation of EXAFS spectrum of Sn1-O3G by (**a, b**) Sn-O and (**c, d**) Sn-C path. Detailed fitting parameters of the two paths are listed in Extended data Table 2.





**Extended data Fig. 41 |** (**a**) The optimized catalytic active center structure (with the Sn-O bond length labelled). (**b**) Differential charge density distribution of Sn site in Sn1-O3(OH)G. Isosurface value: 0.08 e/A3; green: Δρ > 0, yellow: Δρ < 0. Charge transfer from Sn atom to oxygen atoms causes oxidation of Sn. Based on the DFT calculation, the Bader charge of Sn/O1/O2/O3/O4 atoms of the initial catalytic center structure are +1.97|e| / -1.19|e| / -0.91|e| / -0.88|e| / -0.77|e|, respectively. The 5s and 5p orbitals of Sn are virtually unoccupied, implying the oxidation state of Sn as +4.

**
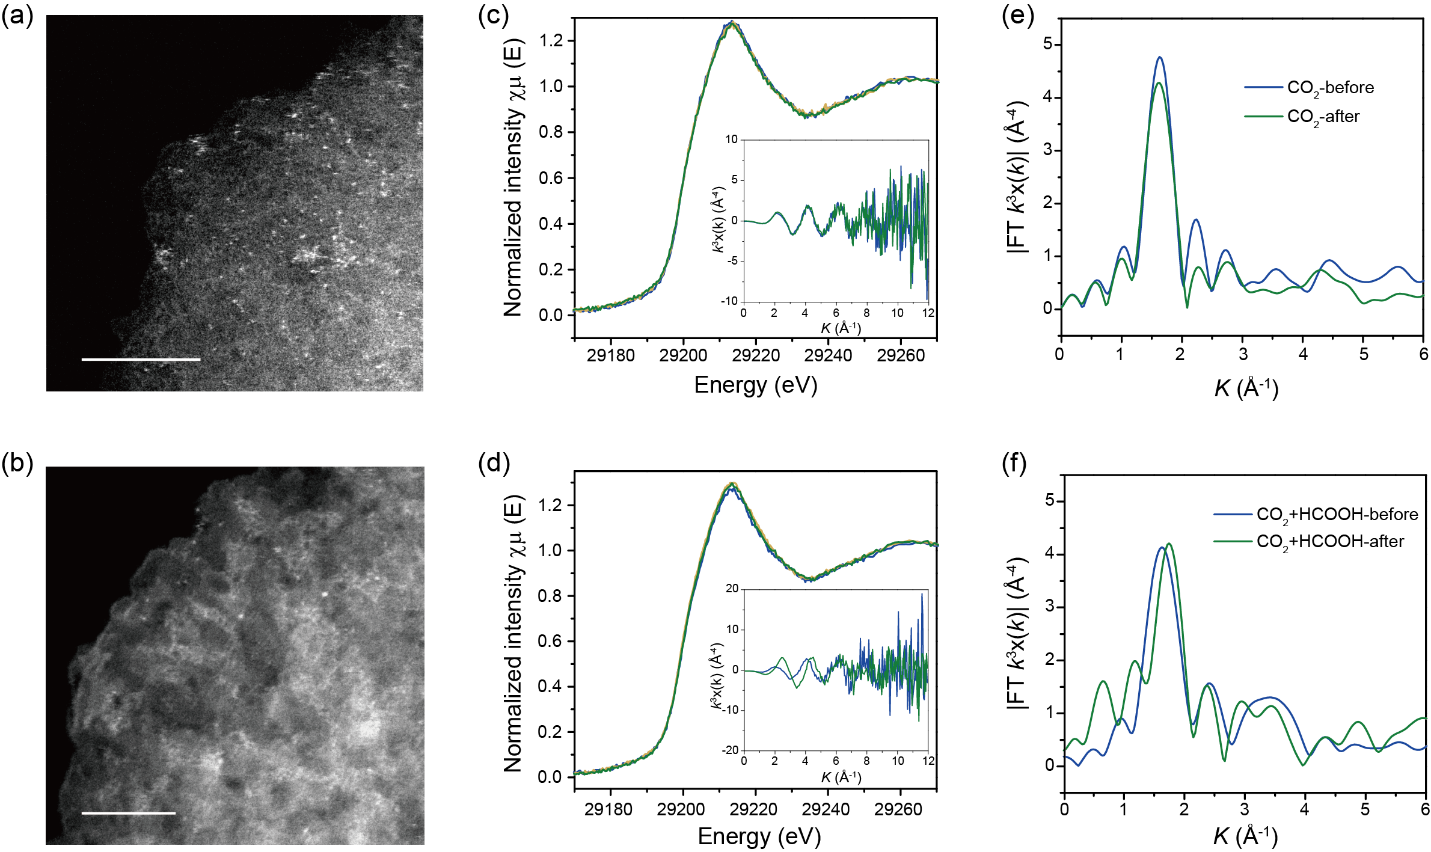
**

**Extended data Fig. 42 |** (**a**) & (**b**) HAADF-STEM images of Sn1-O3G before and after 10 h of CO2RR at an applied potential of -0.8 V (vs. RHE). Scale bar: 5 nm. (**c**) to (**f**) Sn K-edge XANES spectra and Fourier transformed (phase uncorrected) Sn K-edge EXAFS spectra of Sn1-O3G, (**c, d**) in CO2 and (**e, f**) in CO2 + HCOOH. Insets in **c** and **d** are the corresponding k3-weighted EXAFS data.


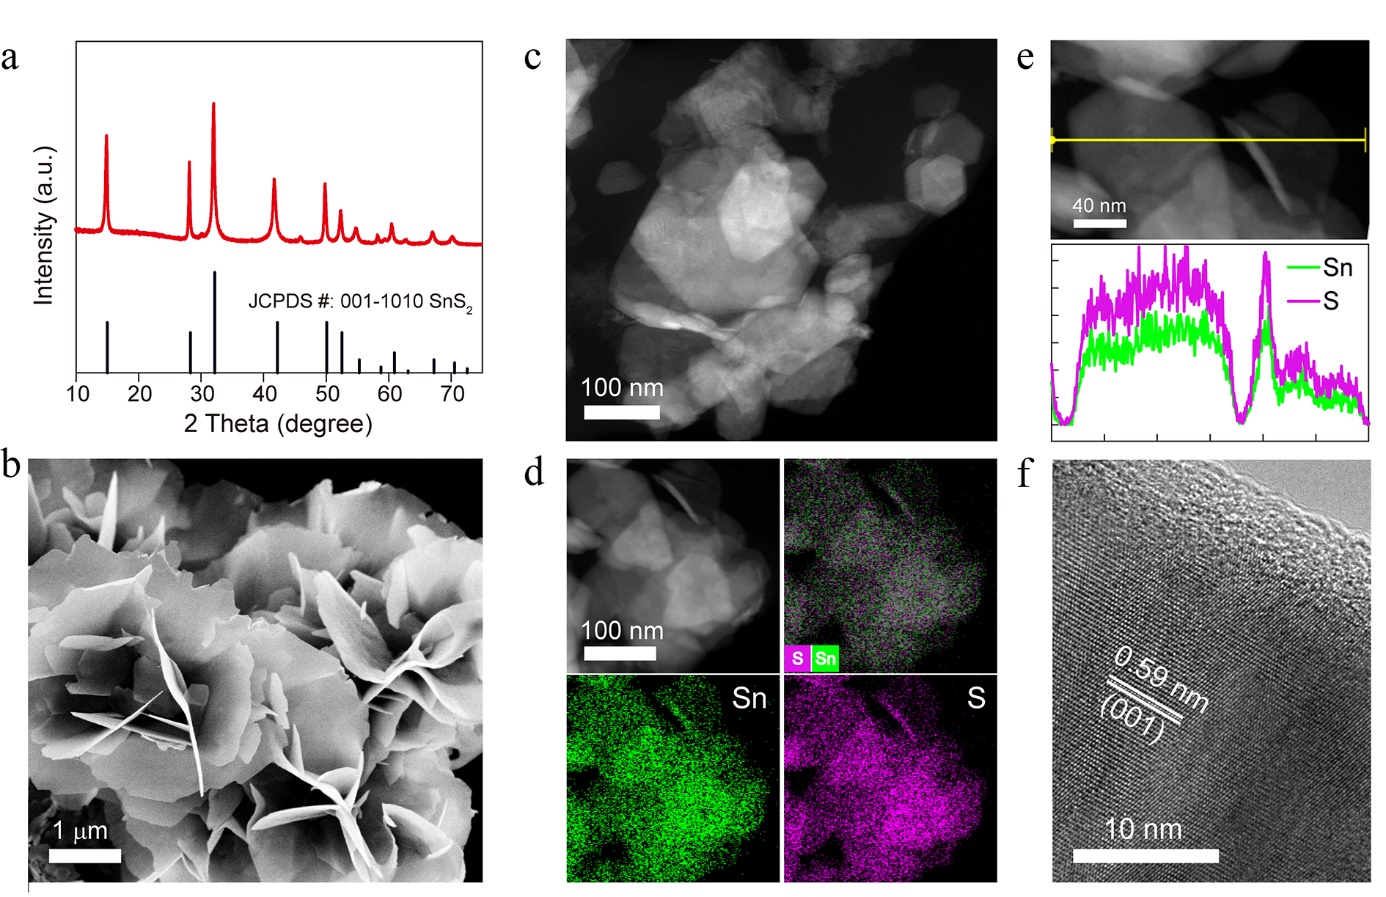


**Extended data Fig. 43 |** (**a**) XRD pattern, (**b**) SEM and (**c**) STEM image, (**d**) TEM-EDX mapping, (**e**) line-scan TEM-EDX elemental analysis, and (**f**) HRTEM image of SnS2.


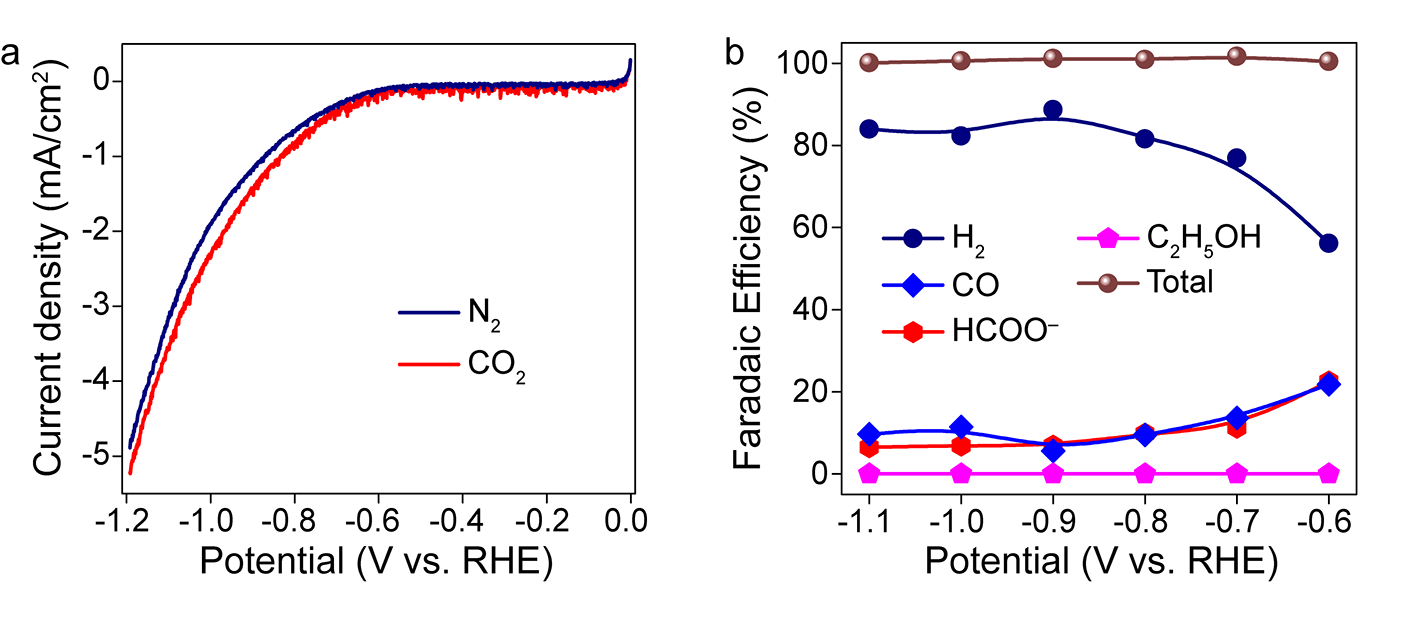
**Extended data Fig. 44 |** (**a**) LSV curves of the 3D carbon electrode collected in N2 and CO2 saturated 0.5 M KHCO3 solution. (**b**) Potential dependent faradaic efficiency for the 3D carbon catalyst. Catalyst loading: 0.5 mg/cm2.


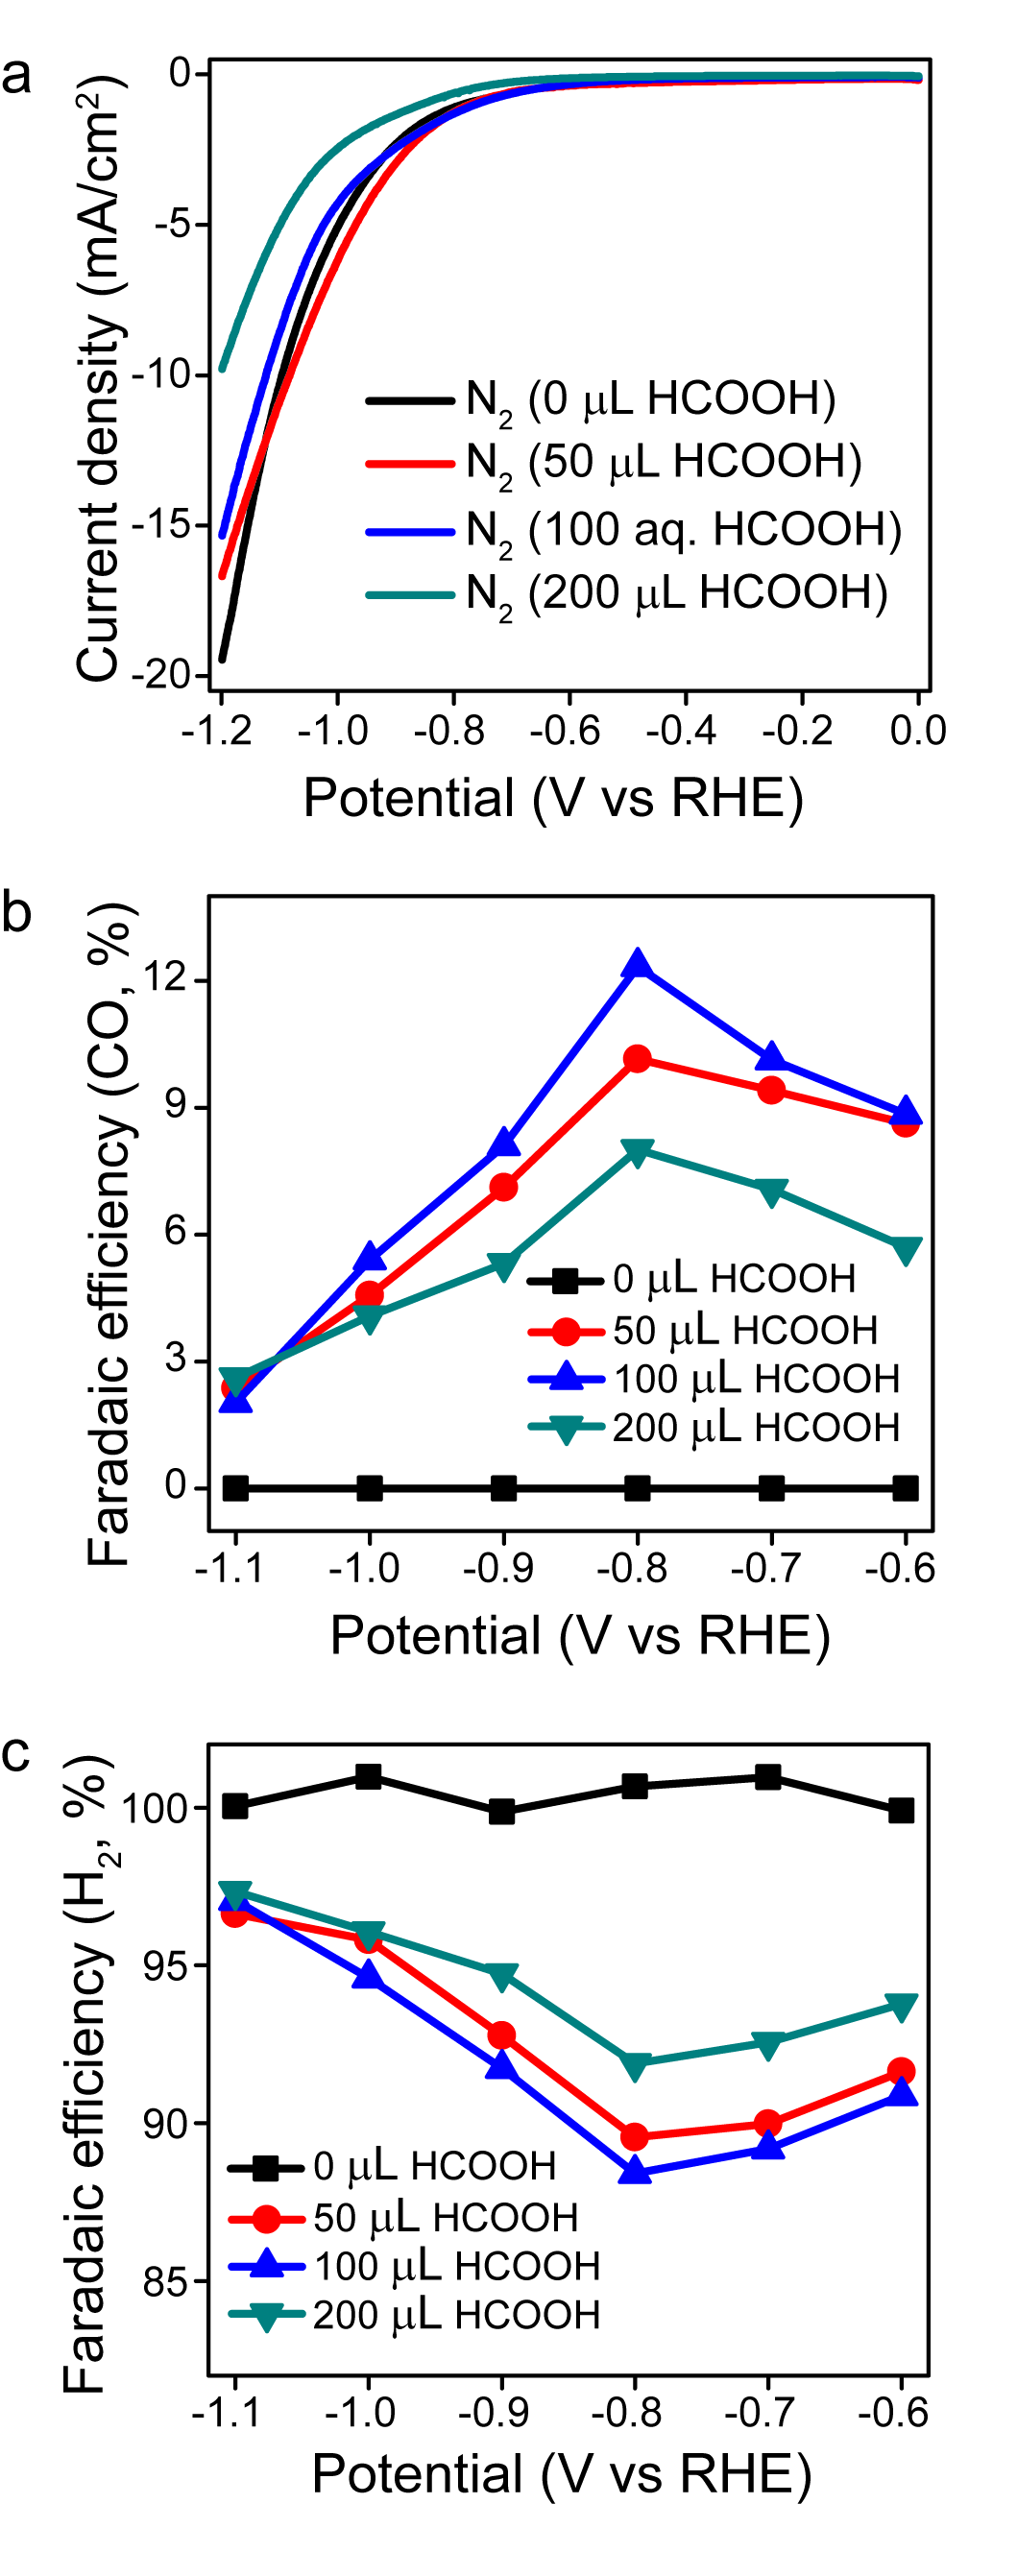


**Extended data Fig. 45 |** (**a**) LSV curve, (**b**) FE of CO and (**c**) FE of H2 for Sn1-O3G with different quantities of HCOOH addition in N2 saturated 0.5 M Na2SO4 electrolyte. Catalyst loading: 0.5 mg/cm2.


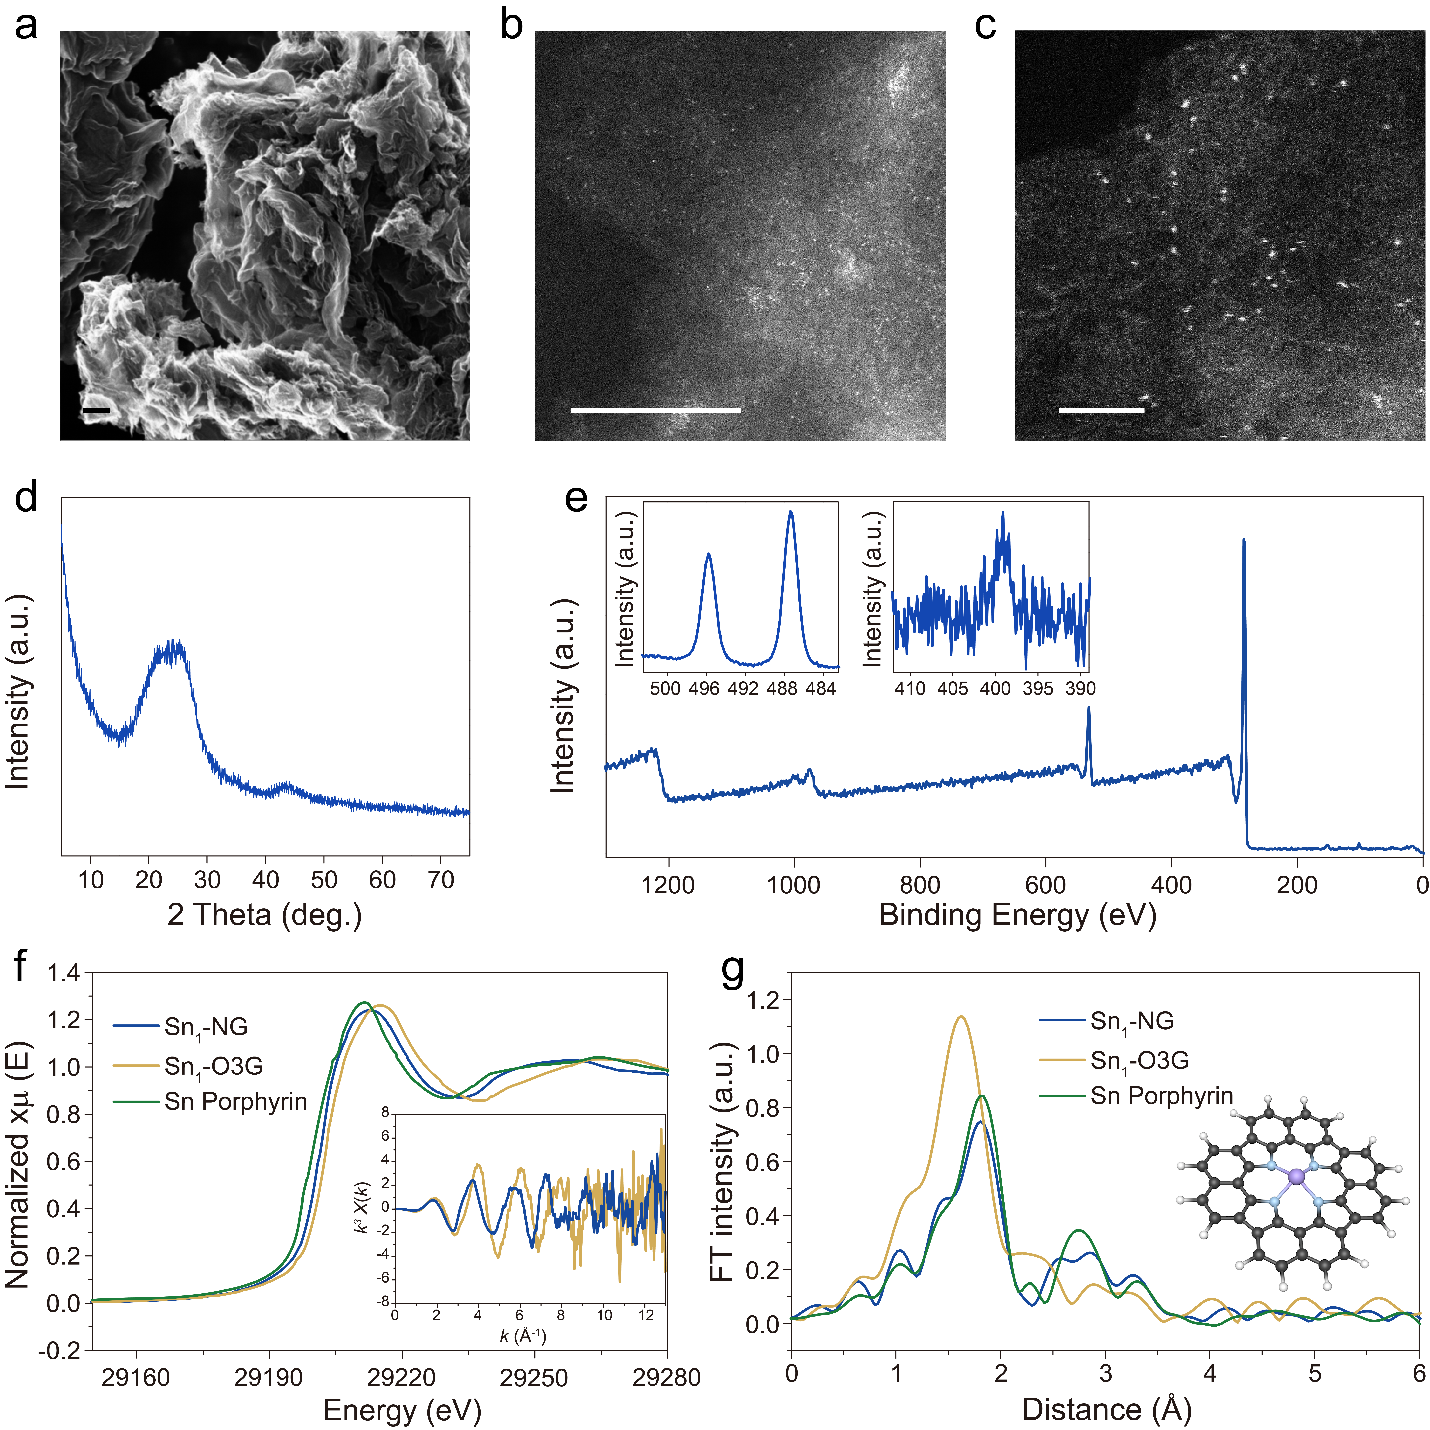


**Extended data Fig. 46 |** Structural characterizations of Sn1-N4G. (**a**) SEM image (scale bar: 200 nm), (**b**) HAADF-STEM image of Sn1-N4G (scale bar: 10 nm), (**c**) HAADF-STEM image of Sn1-N4G (scale bar: 2 nm), (**d**) XRD pattern, (**e**) XPS spectra, (**f**) Sn K-edge XANES spectra (inset shows the k2-weighted k-space spectra), and (**g**) Fourier-transformed (phase uncorrected) Sn K-edge EXAFS spectra (inset shows the atomic model for Sn1-N4G), where grey, blue, purple, and white spheres represent C, N, Sn and H atoms, respectively.

**Note:** The unique C-C coupling ability on the Sn1-O3G catalyst (with O atoms coordinated Sn center) is not an accidental discovery, which is the result from our early works on the CO2RR catalytic behavior of transition metal single atom catalysts. Specifically, in our preliminary experiments, the Sn based CO2RR catalysts, including metallic Sn nanoparticles, SnS2 nanosheets, SnS2 on nitrogen doped graphene and single Sn atom on nitrogen doped graphene (Sn1-N4G) were investigated. Based on the systematic structural and electrochemical characterizations, we found that the Sn1-N4G and Sn1-O3G displayed distinguished behaviors for the CO2RR in the condition with presence of formate in KHCO3, although both of them reduced CO2 to CO in KHCO3 without formate.

The detailed structural characterizations and electrocatalytic behaviors of Sn1-N4G are summarized in Extended data Figs. 45 and 46. Scanning electron microscopy (SEM) measurement (Extended data Fig. 46a) reveals that the as-prepared Sn1-N4G has a stratified structure. The aberration corrected high-angle annular dark-field scanning transmission electron microscopy (HAADF-STEM) images display bright spots, which can be assigned to the heavy Sn single atoms dispersed on N-doped carbon support (Extended data Fig. 46b and c). X-ray diﬀraction (XRD) pattern shows no characteristic peaks of metallic Sn and Sn compounds (Extended data Fig. 46d). X-ray photoelectron spectroscopy (XPS) was used to characterize the valence state of N and Sn (Extended data Fig. 46e). The peak at 401.3 eV can be assigned to graphitic N. Pyridinic N (398.7 eV) and pyrrolic N (398.7 eV) are dominant in the Sn1-N4G, which are in a π conjugated system whose p-electrons synergistically facilitate the stabilization of Sn single atoms. The chemical state of Sn atoms in Sn1-N4G was further investigated by X-ray absorption spectroscopy (XAS) (Extended data Fig. 46f-g). Extended data Fig. 46f shows that the Sn absorption rising-edge for Sn1-N4G is close to that for Sn porphyrin (Sn2+), indicating that the oxidation state of Sn in Sn1-N4G is close to +2, which is obviously lower as compared to that in Sn1-O3G (Sn4+). Extended data Fig. 46g shows the FT-EXAFS spectra. The bond length of the first shell for Sn1-N4G is almost the same with that for Sn porphyrin, suggesting nearly identical coordination environment of the Sn atoms (with SnN4 configuration) in the two samples.

**
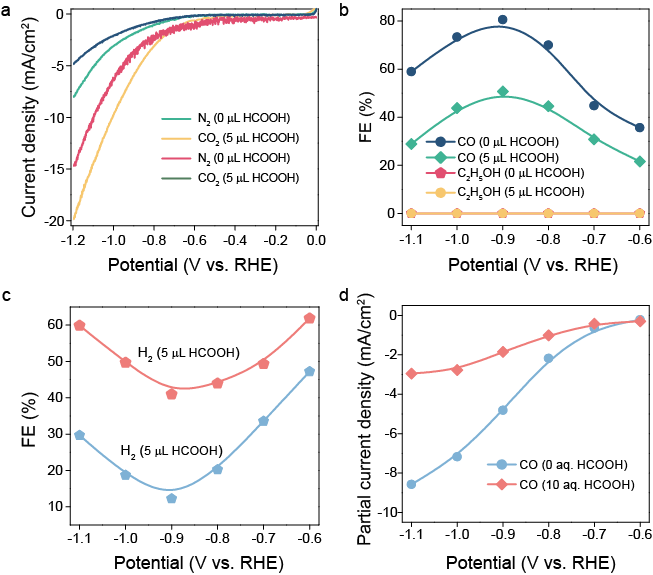
**

**Extended data Fig. 47 |** (**a**) LSV curves. Faradaic efficiency for (**b**) CO and (**c**) H2. (**d**) Potential dependent CO partial current density of Sn1-N4G measured in CO2 saturated 0.5 M KHCO3 electrolyte without and with addition of HCOOH.

**Note:** Extended data Fig. 47a shows the LSV curves of Sn1-N4G measured in N2 and CO2 saturated 0.5 M KHCO3 electrolyte without and with addition of HCOOH. As shown, the HCOOH addition leads to a reduced polarization current density, indicating interaction of HCOOH with the Sn1-N4G catalyst. But unlike the result for the Sn1-O3G catalyst, the Sn1-N4G catalyst (with 4 nitrogen atoms coordinated Sn center) failed to produce any ethanol, indicating the critical roles of both the single atomic Sn center and the coordinated oxygen atoms in Sn1-O3G for the C-C coupling reaction.


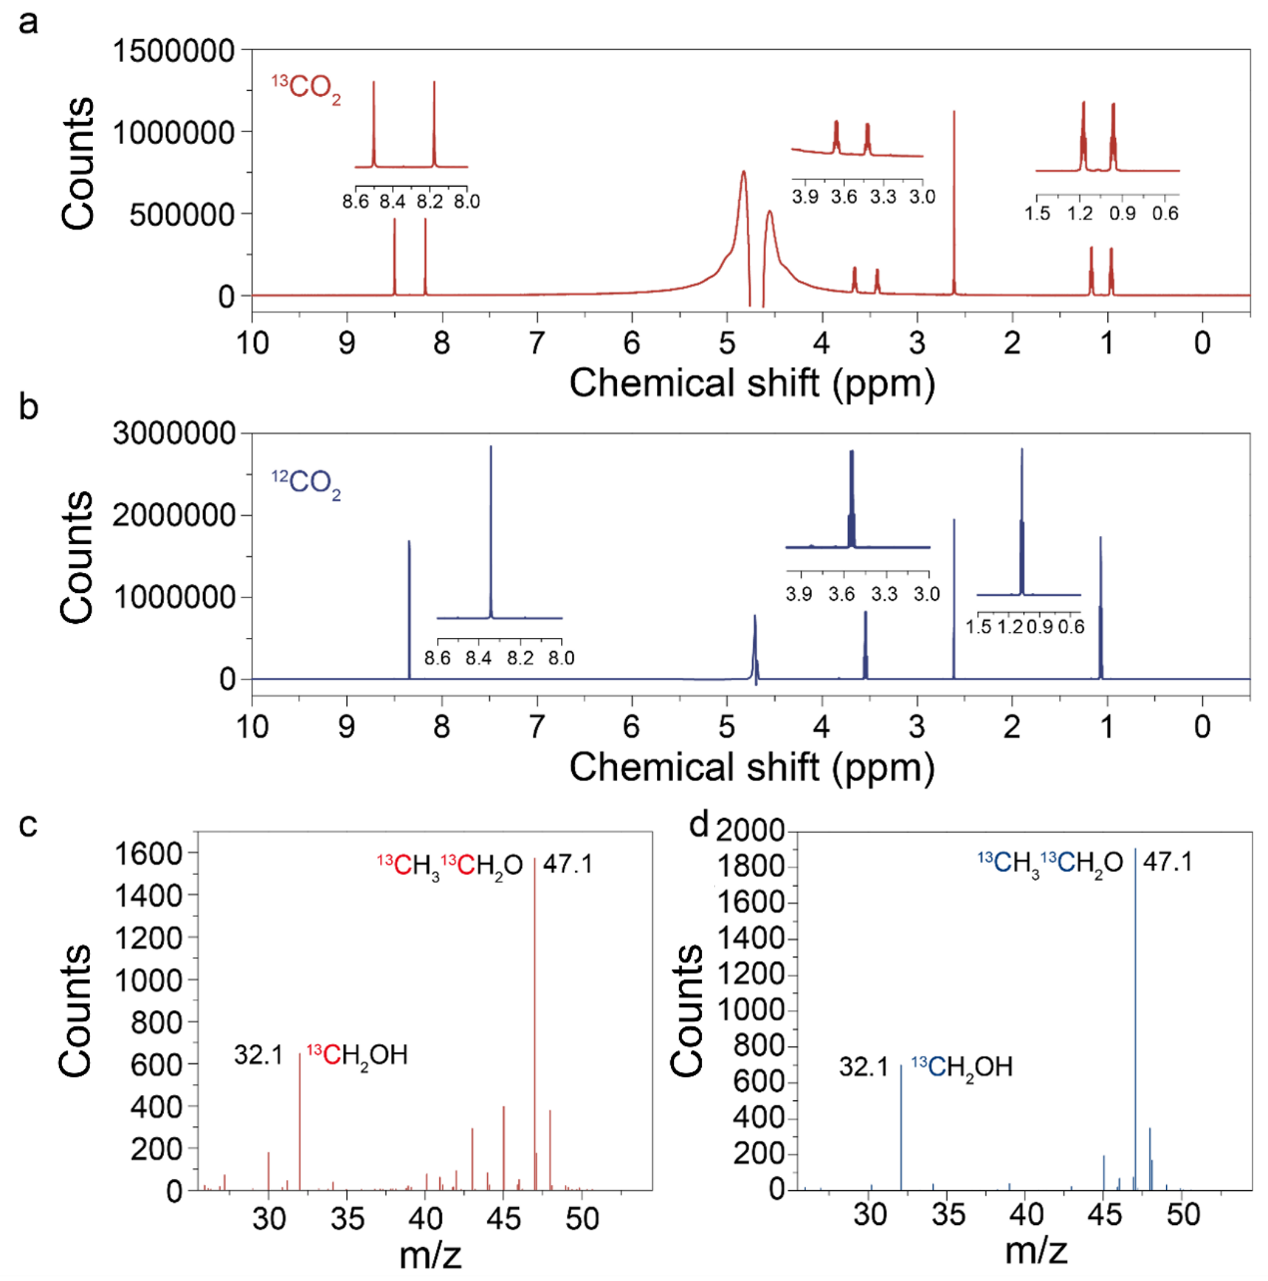


**Extended data Fig. 48 |** 1H 1D NMR spectrum of products and DMSO recorded using isotopically labelled 13CO2 (**a**) and 12CO2 (**b**) at -0.8 V (vs. RHE). Mass spectra recorded using isotopically labelled 13CO2 at (**c**) -0.8 V and (**d**) -0.9 V (vs. RHE).

**To understand the ethanol formation process on the SnS2/Sn1-O3G tandem catalyst, the following additional experiments and kinetics simulation were performed.**

1. ***Characterization of the morphology and structure change of the SnS2 layer on the SnS2/Sn1-O3G tandem catalyst in CO2RR.***

To probe the C-C coupling reaction taking place on SnS2/Sn1-O3G, the morphology and structure change of the SnS2 overlayer on SnS2/Sn1-O3G in CO2RR was investigated by TEM and XPS. Extended data Figs. 49a-d show the TEM images of SnS2/Sn1-O3G after 30 min and 1 h CO2RR at -0.8 V vs. RHE. It is found that the SnS2 nanosheets on Sn1-O3G disappeared, at the same time, some nanoparticles were formed on 3D carbon support. The lattice constants of the nanoparticles measured in Extended data Figs. 49b and d are ~2.37 and ~3.45 Å, which can be assigned to the (200) and (111) planes of metallic Sn. The Fast-Fourier-transform (FFT) also confirms the metallic fcc structure of Sn. XPS survey spectrum of SnS2/Sn1-O3G collected after the CO2RR as displayed in Extended data Fig. 49e shows a dramatically reduced Sn content. Moreover, high-resolution Sn 3d spectrum shows a -0.7 eV shift in the Sn binding energy, suggesting that SnS2 nanosheets were reduced to metallic Sn nanoparticles, closely attached to the Sn1-O3G, which is expected to reduce the diffusion distance of HCOOH generated on Sn nanoparticles to the Sn site of Sn1-O3G.


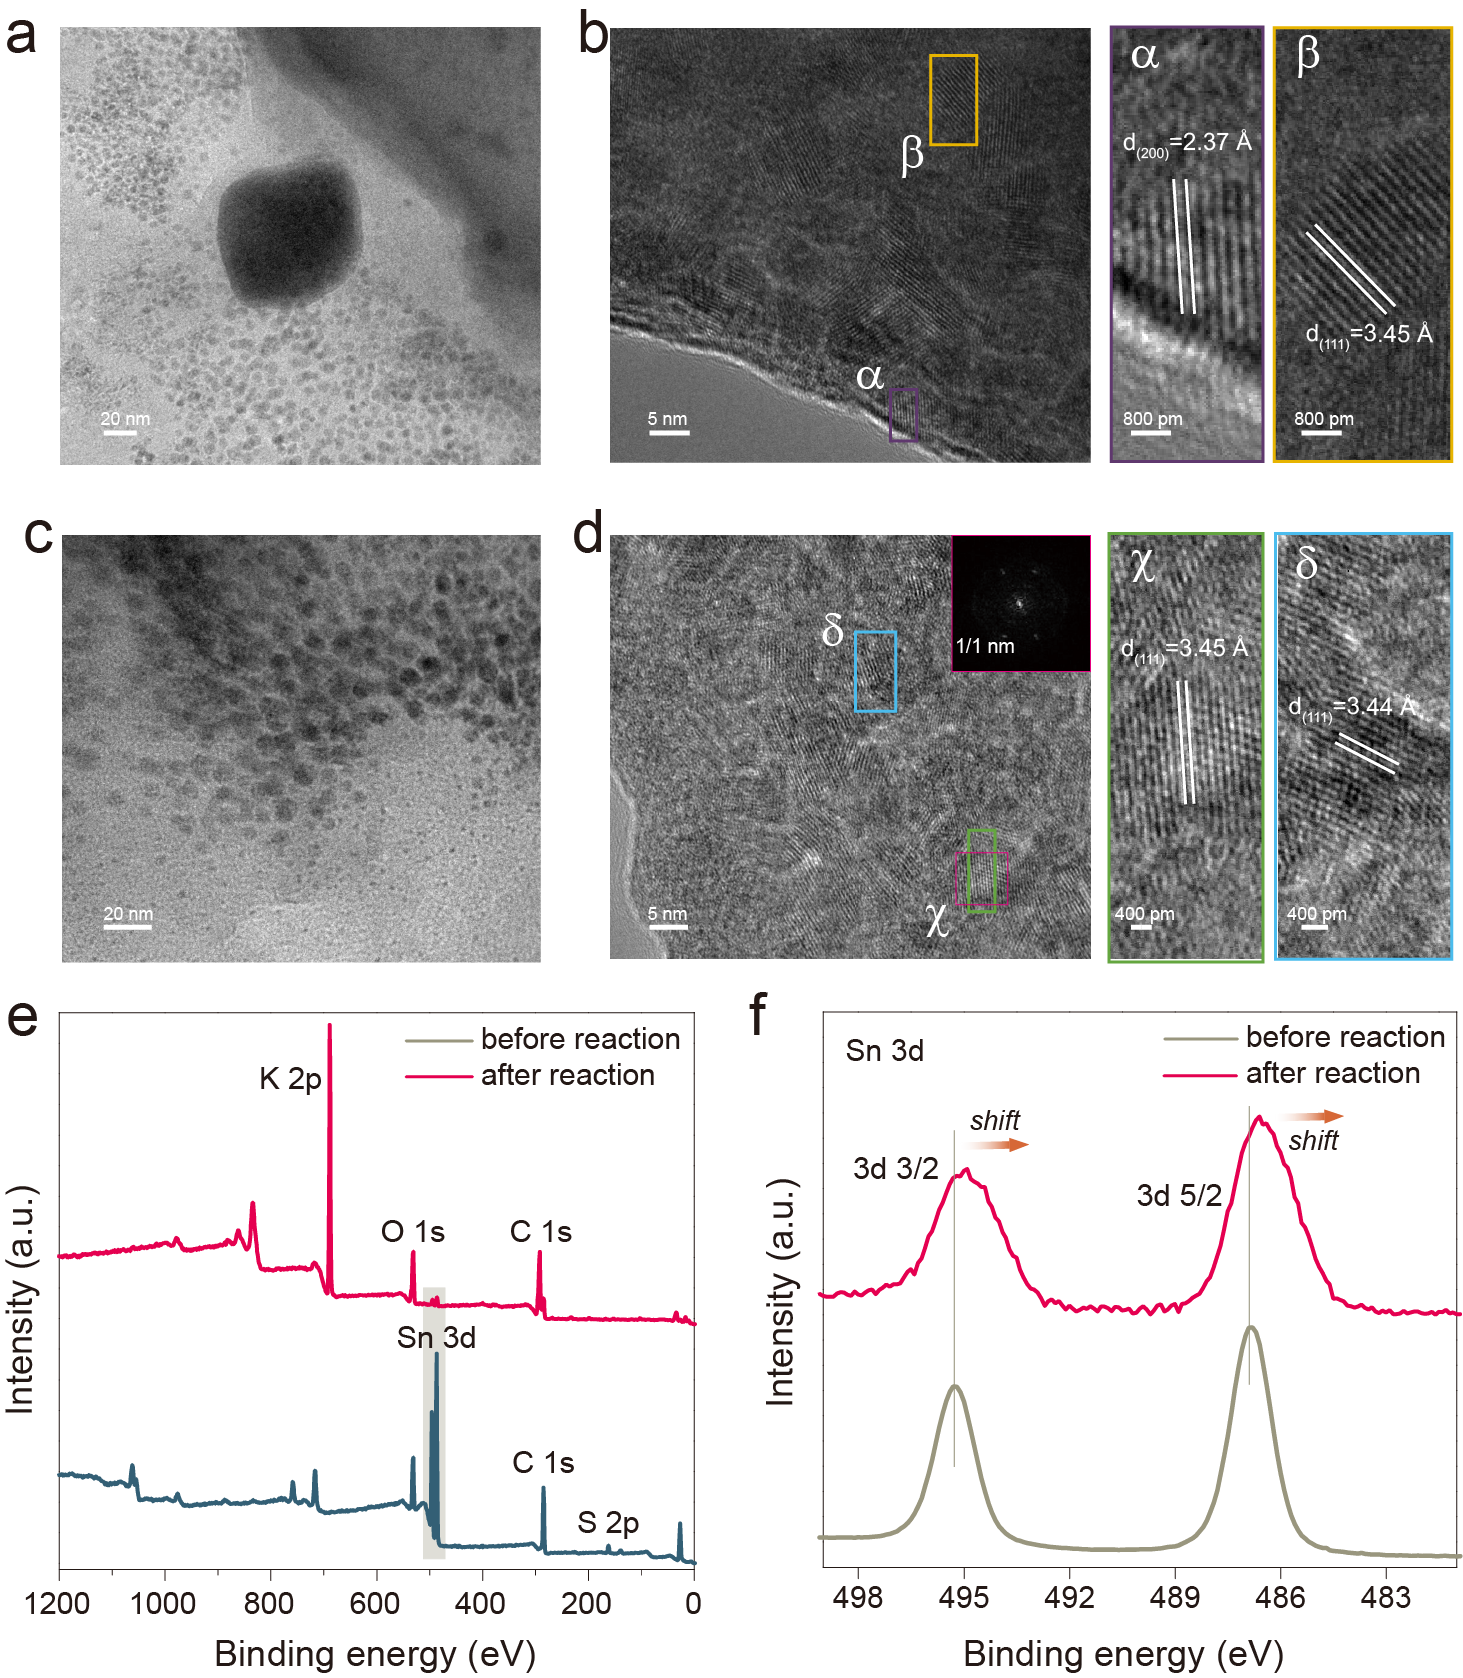


**Extended data Fig. 49 |** TEM images of SnS2/Sn1-O3G after (**a & b**) 30 min and (**c & d**) 1 h CO2RR at -0.8 V (vs. RHE). Inset in Extended data Fig. 49d shows the Fast-Fourier-transform (FFT) of the selected area. XPS survey (**e**) and high-resolution Sn 2p spectra (**f**).

1. ***Kinetics modeling to probe ethanol formation process on the SnS2/Sn1-O3G tandem catalyst.***

To understand the kinetics of ethanol formation on the SnS2/Sn1-O3G tandem catalyst, kinetic models for CO2 reduction to HCOOH on SnSx (reduced SnS2), CO2 reduction to CO as well as ethanol formation on Sn1-O3G were constructed. The kinetics parameters of the kinetic models were obtained by fitting the models with steady-state internal resistance (IR) corrected J-V curves by a global optimization method, which composes of a random search using genetic algorithm and a local optimization employing trust-region-reflective algorithm. All simulations were performed using a commercial software package (MATLAB R2010b, the MathWorks Inc.). The relative error tolerance for the initial value problem of ordinary differential equations is set as 10-8.

- 1. ***CO2 reduction to CO on Sn1-O3G***

Assuming the Sn single atom is the active site (*) in CO2 reduction to CO, the elementary reaction steps and enrolled reaction rate equations are listed in Extended data Table 9. The control equations are listed in Extended data Table 10, where *r* is the elementary reaction rate [mol·m-2·s-1], *K* is the reaction rate constant [mol·m-2·s-1], *c* is the concentration [mol·m-3], *θ* is the coverage, *α* is the symmetry coefficient, *η* is the overpotential [V], R is the gas constant [J·mol-1·K-1], T is the temperature [K], *θ* subscripts CO2 and COOH represent the intermediate CO2,ads and COOHads, respectively, and *c* subscripts CO2 and HCO3 represent the reactant CO2 and electrolyte KHCO3, respectively.

Extended data Fig. 50 displays the comparison of the experimental CO2RR polarization curve with the simulated one, as well as the coverage of intermediates COOHads and CO2, ads. It can be observed that the three-step mechanism (TS7.1~TS7.3) can reproduce the experimental data and intermediates coverage decreases with increasing current density. The kinetics parameters are listed in Extended data Table 11. The magnitude of the reaction rate constant K201 and the coverage difference of COOHads and CO2, ads () suggest that the COOHads formation step (TS7.2) is the rate determining step. Therefore, the dissociative COOH- from COOHads is negligible in CO2 reduction process to CO on the Sn1-O3G.


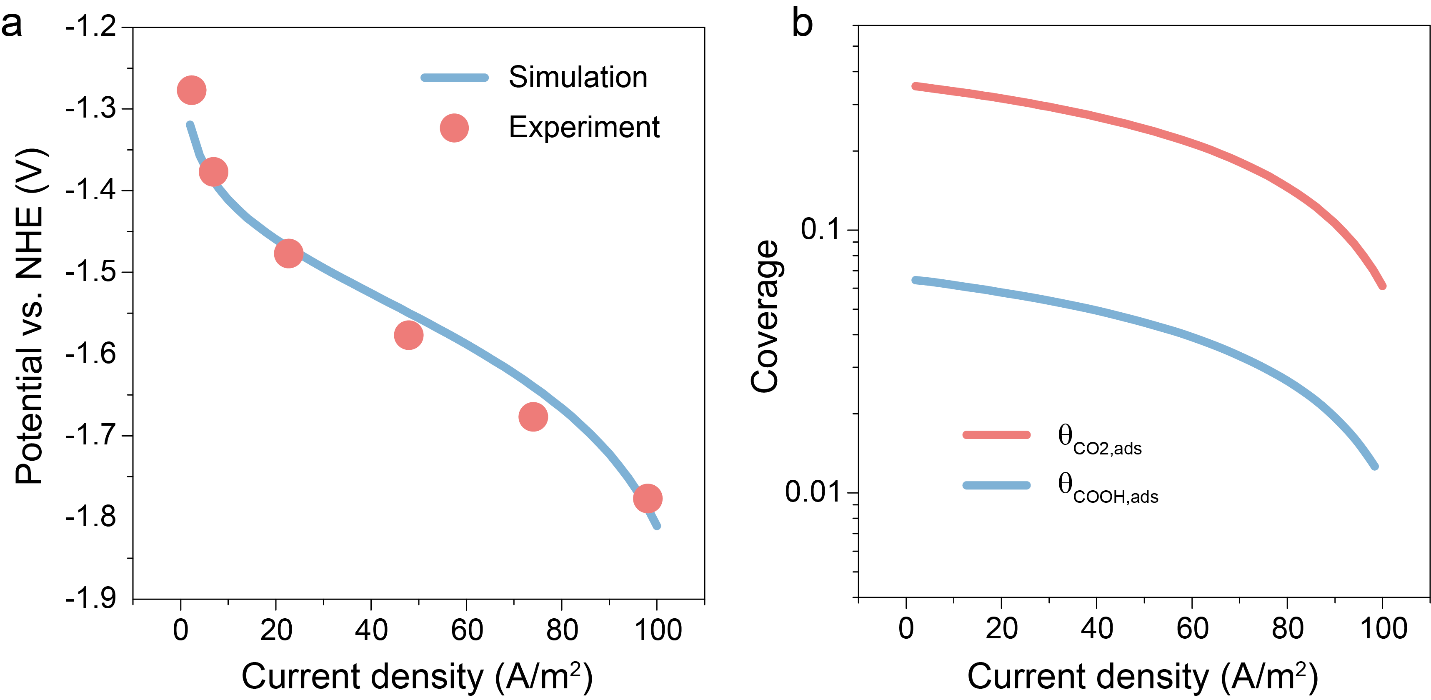


**Extended data Fig. 50 |** (**a**) Comparison of experimental polarization curve with the simulated one by the kinetic model. (**b**) Simulated coverage of intermediates COOHads and CO2, ads with current density.

- 1. ***CO2 reduction to HCOOH on SnSx***

The Sn nanoparticles reduced from SnS2 nanosheets are able to electrochemically reduce CO2 to HCOOH. Taking SnSx as the active site (**), the elementary reaction steps and enrolled reaction rate equations are listed in Extended data Table 12, where *r’* is the elementary reaction rate [mol·m-2·s-1] and *K’* is the reaction rate constant [mol·m-2·s-1]. The control equations are listed in Extended data Table 13.

Extended data Fig. 51 displays the comparison of the experimental polarization curve of CO2 reduction to HCOOH on SnSx with the simulated one, the dissociative COOH- concentration as well as the coverage of intermediates COOHads and CO2, ads, respectively. The kinetics parameters of the CO2 reduction to HCOOH (TS10.1~TS10.3) are listed in Extended data Table 14.

It is observed that the simulated CO2RR polarization curve using the three-step mechanism can reproduce the experimental data. The concentration of the dissociative COOH- increases and the coverage of intermediates COOHads and CO2, ads decreases with increasing current density. The magnitude of the reaction rate constant K’201 and the coverage difference between COOHads and CO2, ads suggest that the COOHads formation is the rate determining step. It is obvious that most part of SnSx is covered with CO2, ads and the dissociative COOH- from COOHads is negligible.


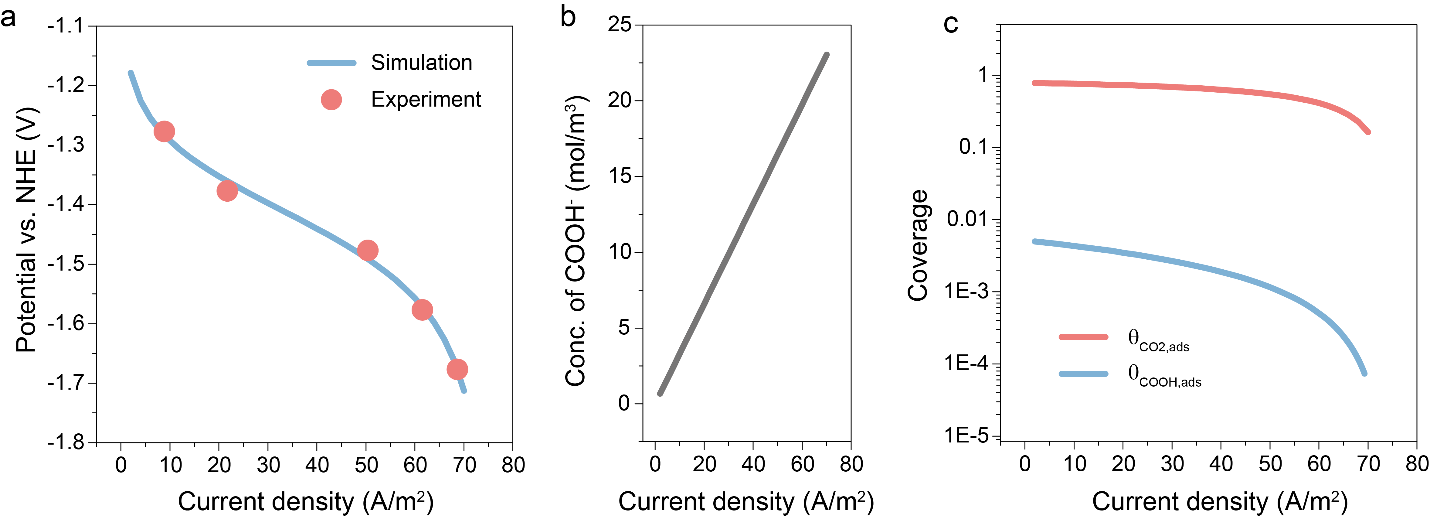


**Extended data Fig. 51 |** (**a**) Comparison of experimental polarization curve with the simulated one by the kinetic model. (**b**) Variation of COOH- concentration with current density. (**c**) Simulated coverage of intermediates COOHads and CO2, ads with current density.

- 1. **CO2** + **COOH- reduction to ethanol**

Sn1-O3G is able to reduce CO2 to ethanol in the presence of HCOOH. Based on isotope experiments together with DFT calculations, CO2, ads, COOHads, COads and COOHCOHads are taken as the intermediates in the CO2RR to ethanol, and the elementary reaction steps and enrolled reaction rate equations are listed in Extended data Table 15, where *r’’* is the elementary reaction rate [mol·m-2·s-1] and *K’’* is the reaction rate constant [mol·m-2·s-1]. *θ* subscripts CO2, COOH, CO and COOHCOH represent the intermediates CO2, ads, COOHads, COads and COOHCOHads, respectively. The control equations are listed in Extended data Table 16.

Extended data Fig. 52 displays the comparison of the experimental polarization curve of CO2 reduction to ethanol on Sn1-O3G in presence of HCOOH and the simulated result, as well as the intermediates coverage obtained in the simulation. By fitting the kinetic model with experimental data, the kinetics parameters are listed in Extended data Table 17.

**
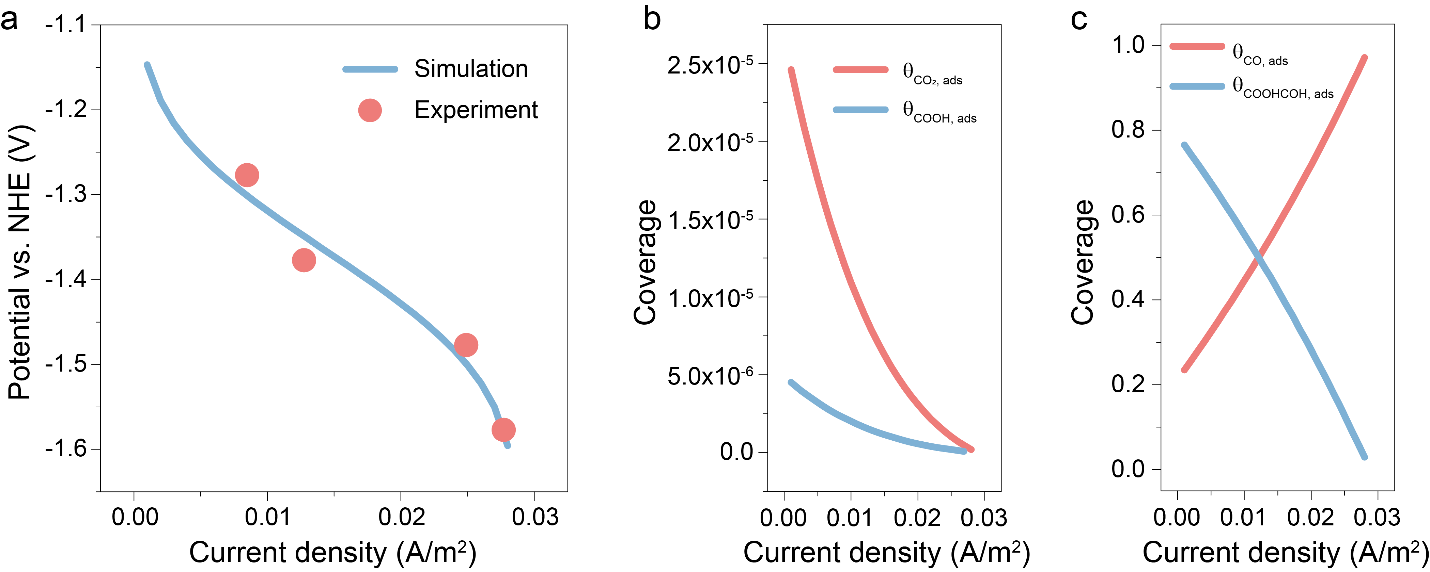
**

**Extended data Fig. 52 |** (**a**) Comparison of experimental polarization curve with the simulated one by the kinetic model. (**b**) Simulated coverage of intermediates COOHads and CO2, ads with current density. (**c**) Simulated coverage of intermediates COads and COOHCOHads with current density.

It can be observed in Extended data Fig. 52that electrochemical reduction of reactant CO2 and COOH- to ethanol mechanism (TS13.1~TS13.5) reproduces the experimental data well. The coverage of the intermediates COOHads and CO2, ads are low, both of which decrease with increase in current density. However, the coverage of intermediates COads and COOHCOHads are high. The former increases with increase of current density, while the later shows an opposite tendency. The CO2 + COOH- reductionto ethanol mechanism involves both chemical (TS13.1 and TS13.4) and electrochemical elementary steps (TS13.2, TS13.3 and TS13.5). It is well-known that the rate constants of the electrochemical elementary steps are potential dependent that increase with increasing current density. At a current density of 8.5×10-3 A m-2, the term K’’101, , and are 1.56×101, 4.06×10-2, 2.22×10-1 and 2.67×104 mol·m-2·s-1, respectively, which is 5, 2, 3 and 8 order of magnitudes higher than *K’’401*(1.26×10-4 mol·m-2·s-1). In combination with the magnitude of the coverage of COads and COOHCOHads, it can be concluded that the elementary chemical step TS13.4 is the rate determining step. From section 2.1 and 2.2, it is clear that [dissociative](javascript:;) COOH- enrolled in the rate determining step can only result from the CO2-to-HCOOH reduction step taking place on SnSx. Therefore, the overall CO2RR to ethanol would be rate-limited by diffusion of COOH-.

1. ***Analysis of Faradaic efficiency for ethanol in CO2RR.***


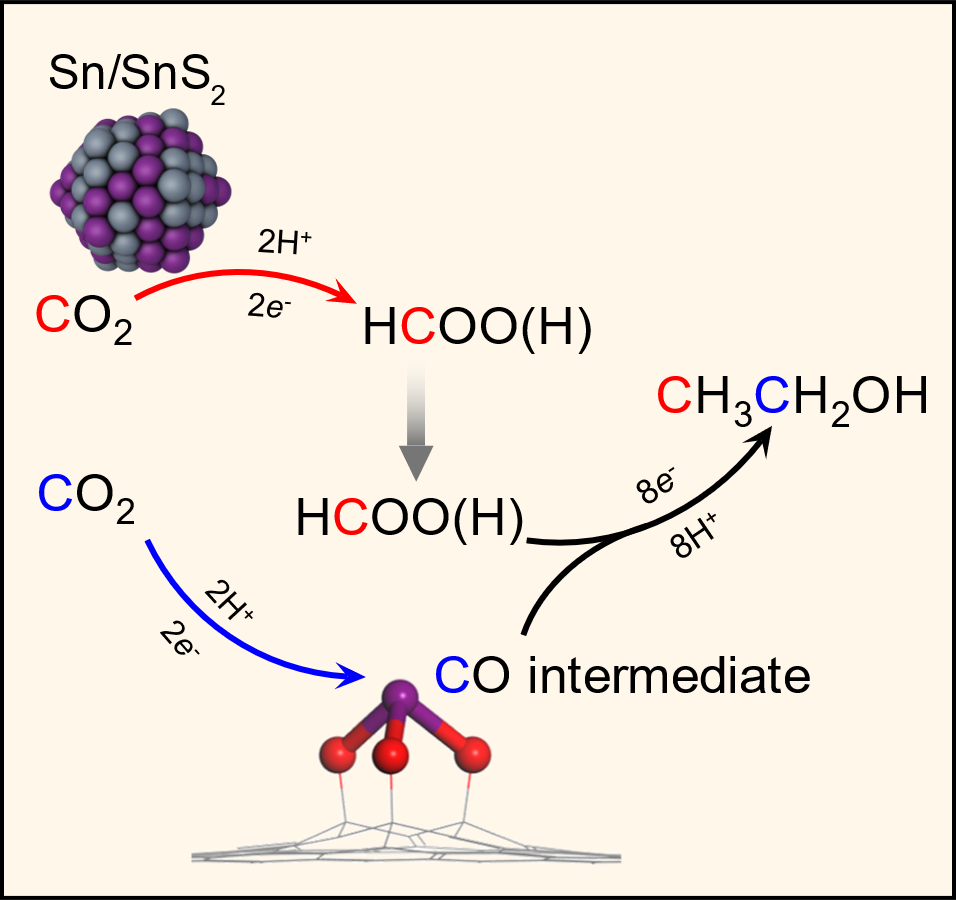


**Extended data Fig. 53 |** A schematic illustration showing the cascade reaction during CO2 reduction to ethanol over SnS2/Sn1-O3G (grey: S, red: O, yellow: H and purple: Sn).

CH3CH2OH is formed on the dual functional Sn site by coupling the *CO intermediate with COOH-, which is generated on reduced SnS2, as shown in Extended data Fig. 53. Considering an idealized situation, the generated COOH- has an equal probability to diffuse towards the dual functional Sn site to participate in the CO2RR to ethanol (based on kinetics analysis, the CO2RR to ethanol is rate-determined by diffusion of COOH-) as well as towards the bulk solution to produce COOH-. Generating two COOH- ions (2HCOOH→2COOH-+2H+) consumes 4e−. Based on the idealized situation, one of them diffuses to the dual functional Sn site, reacting with one *CO intermediate to produce one ethanol molecule. In total, there involve 12e− transfer to produce one ethanol molecule. The other COOH- ion diffuses to the bulk solution, which involves 2e− transfer. As a result, the FEethanol can be estimated as:

This value is higher than the best *FEethanol* obtained experimentally.


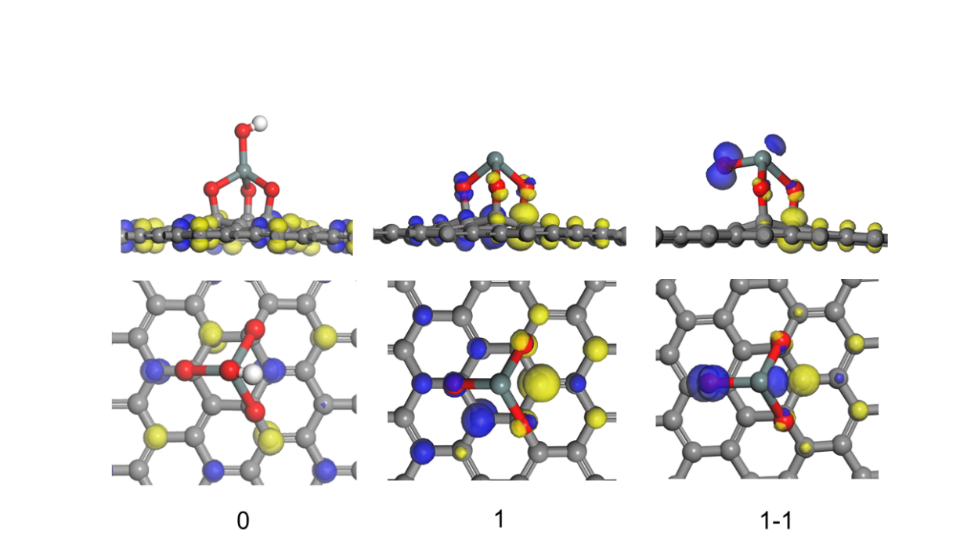


**Extended data Fig. 54 |** Calculated spin density for 0, 1 and 1-1. Yellow stands for spin up and blue for spin down. Isosurface value: 0.01 e/Å3.

**Note:** The magnetic moment μB of the active site plays an important role in activation of CO2. As displayed in Extended data Fig. 54, the calculated μB for Sn/O2/O3/O4 atoms of the initial catalytic center structure **0** are nonmagnetic (μB = 0), while Sn-3O active sites in the intermediates **1** and **1-1** exhibit nonzero magnetism. In the intermediate **1**,the calculated μB for Sn/O2/O3/O4 atoms are 0.00, 0.04, -0.04, and -0.02, respectively. In the intermediate **1-1**,the calculated μB for Sn/O2/O3/O4 atoms are 0.40, 1.24, -0.04, and -0.04. The spin polarization of three oxygen atoms in the intermediate **1** forces one of the oxygen atoms to be of radical nature (with unpaired electron) in intermediate **1-1** that is active for CO2 adsorption. Therefore, the spin-polarization on oxygen atoms of Sn-3O dual functional active site is responsible for the activation of CO2.

**
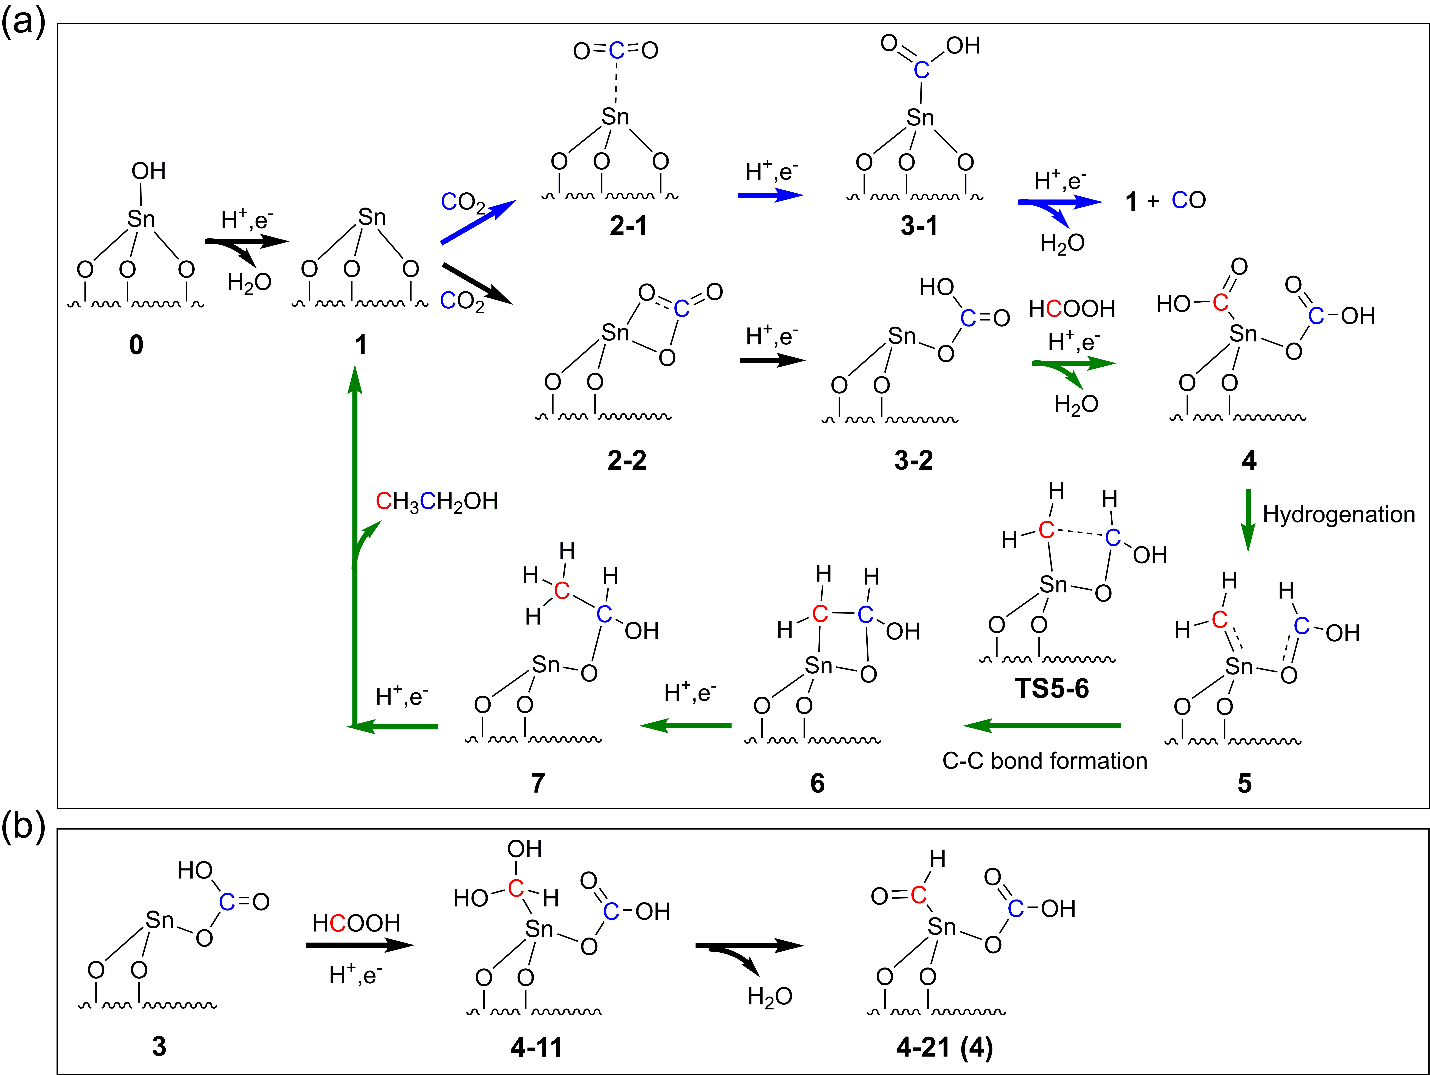
**

**Extended data Fig. 55 |** (**a**) Proposed mechanism for formation of major CO2RR products (CO and ethanol) on Sn1-O3G. (**b**) The formation of dual active centers comprising Sn and O atoms that can adsorb *CO(OH) and *COH intermediates.

**Note:** According to the experimental observations, we propose a catalytic cycle as shown in Extended data Fig. 55a. At the standard condition (U = 0, p = 1 bar, T = 298 K), the free energy ΔG of the reaction A + H+ + e-→*AH, can be calculated as the free energy of the reaction A + 1/2H2→*AH. ΔG = ΔE + ΔZPE + ΔHΔ0→298K–TΔS was calculated as follows: the reaction energy ΔE = E(product) - E(reactant), where ΔZPE, ΔH and ΔS denote the difference in zero-point energy, enthalpy, and entropy due to the reaction, respectively. Depending on the different activity sites of Sn1-O3G catalyst, there are two binding modes of CO2, labeled as **2-1** and **2**, which lead to two pathways of CO2 electrochemical reduction. For **2-1**, CO2 is adsorbed on the top of the Sn site, with an adsorption energy of -0.07 eV. The following COOH* formation on the Sn site are the energy-demanding steps with the barriers of 0.86 eV. In **2**, the carbon atom of CO2 binds to the oxygen site of Sn1-O3G with adsorption energy of -0.75 eV, while the O-C bond between the active oxygen site and carbon support cleavages, which indicates a strong interaction between the adsorbed CO2 and the multifunctional oxygen site on Sn1-O3G. With the exergonicity of 1.68 eV, species **3** is formed as the dominant intermediate in the hydrogenation process of CO2, which hardly generates CO directly except from the recovered catalyst going through **3-1** intermediate. Hence, CO desorption occurs at the Sn site of Sn1-O3G catalyst, which explains the catalytic role of Sn1-O3G in electrochemical reduction of CO2 to CO without HCOOH.

Based on the electrochemical data, addition of HCOOH during CO2RR decreases the Faradaic efficiency of CO, while promoting ethanol formation, in which the methyl carbon (*CH3) and the methylene carbon (*CH2OH) in CH3CH2OH come from HCOOH and CO2, respectively. After formation of the preferred intermediate (Extended data Fig. 55b), **3**, the HCOOH adsorbs at the Sn site with the carbon atom, and the carbonyl group in HCOOH* is hydrogenated to form **4-11** with the free energy barrier of 0.17 eV, and dehydrated to generate intermediate **4-21(4)**, with the free energy barrier of 0.35 eV as shown in Extended data Fig. 54b.





**Extended data Fig. 56 |** (a) Reaction pathways to competing products and (b) DFT calculated free energy profile for competing products, including formic acid, formaldehyde, CO and H2 at standard condition (U = 0, p = 1 bar, and T = 298 K).

**Note:** The DFT calculation results show that the protonation of Sn1-O3(OH)-G pre-catalytic site is exergonic to give more stable intermediate **1** compared to **1-1**, and CO2 binding is also exergonic, which is more favorable than H2 formation with the free energy barrier of 0.38 eV. The other competing products, including formic acid, formaldehyde and CO, stem from the *CO(OH) intermediate **3-1** on Sn site, and the free energy barriers of the rate-determining step are 0.23 eV, 0.34 eV and 0.06 eV, respectively. While the *CO(OH) intermediate **3** on O site is apt to generate by a process of continuous exergonic steps, which provides the possibility of C-C coupling.


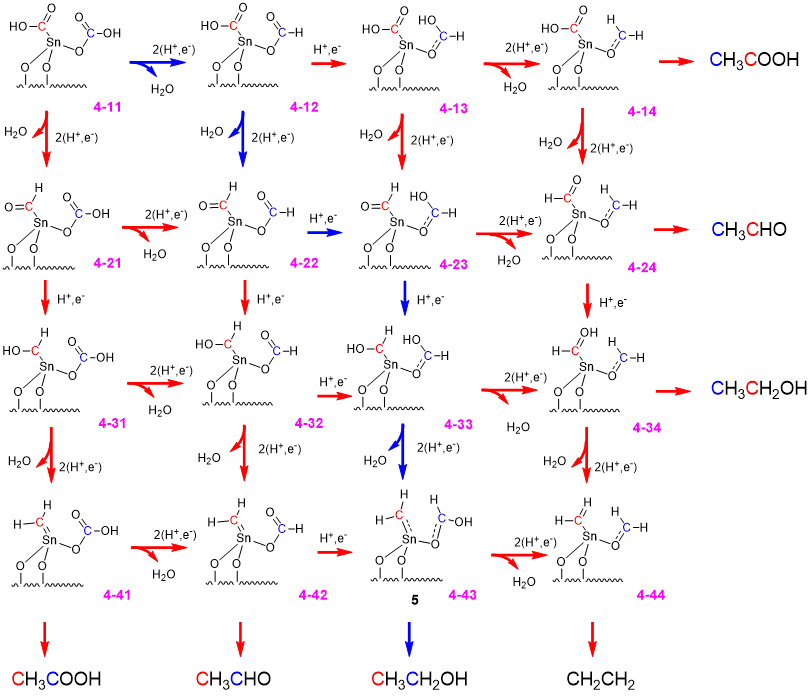


**Extended data Fig. 57 |** (**a**) The network of competing C2 products stemming from **3**. (**b**) The free energies for the network of competing C2 products relative to **3** (unit: eV). The contents in bold represent the favorable intermediates (or transition states) and the corresponding free energies relative to **3** (U = 0, p = 1 bar, and T = 298 K).

**Note:** Based on the systematical calculation using the computational hydrogen electrode (CHE) model, the networks of competing C2 products are displayed in Extended data Fig. 57a, and the free energies relative to **3** are listed in Extended data Table 18. The computational results suggest that *CO(OH) on the O site is initially reduced with an endergonic energy of 0.14 eV. Then, *CHO on the O site and the Sn site transforms to *CHOH via continuous endergonic processes, respectively. The suspension of the reduction takes place at intermediate **5** after the hydrogenation of *CHOH on the Sn site. With the free energy barrier of 0.13 eV, C-C bond is formed between *CH2 on Sn site and *CHOH on O site. The C2 adsorbate **6** is the precursor for ethanol detected by the experiment, in which the methyl C (*CH3) comes from HCOOH and the C in CO2 goes to the methylene C (*CH2OH).

**
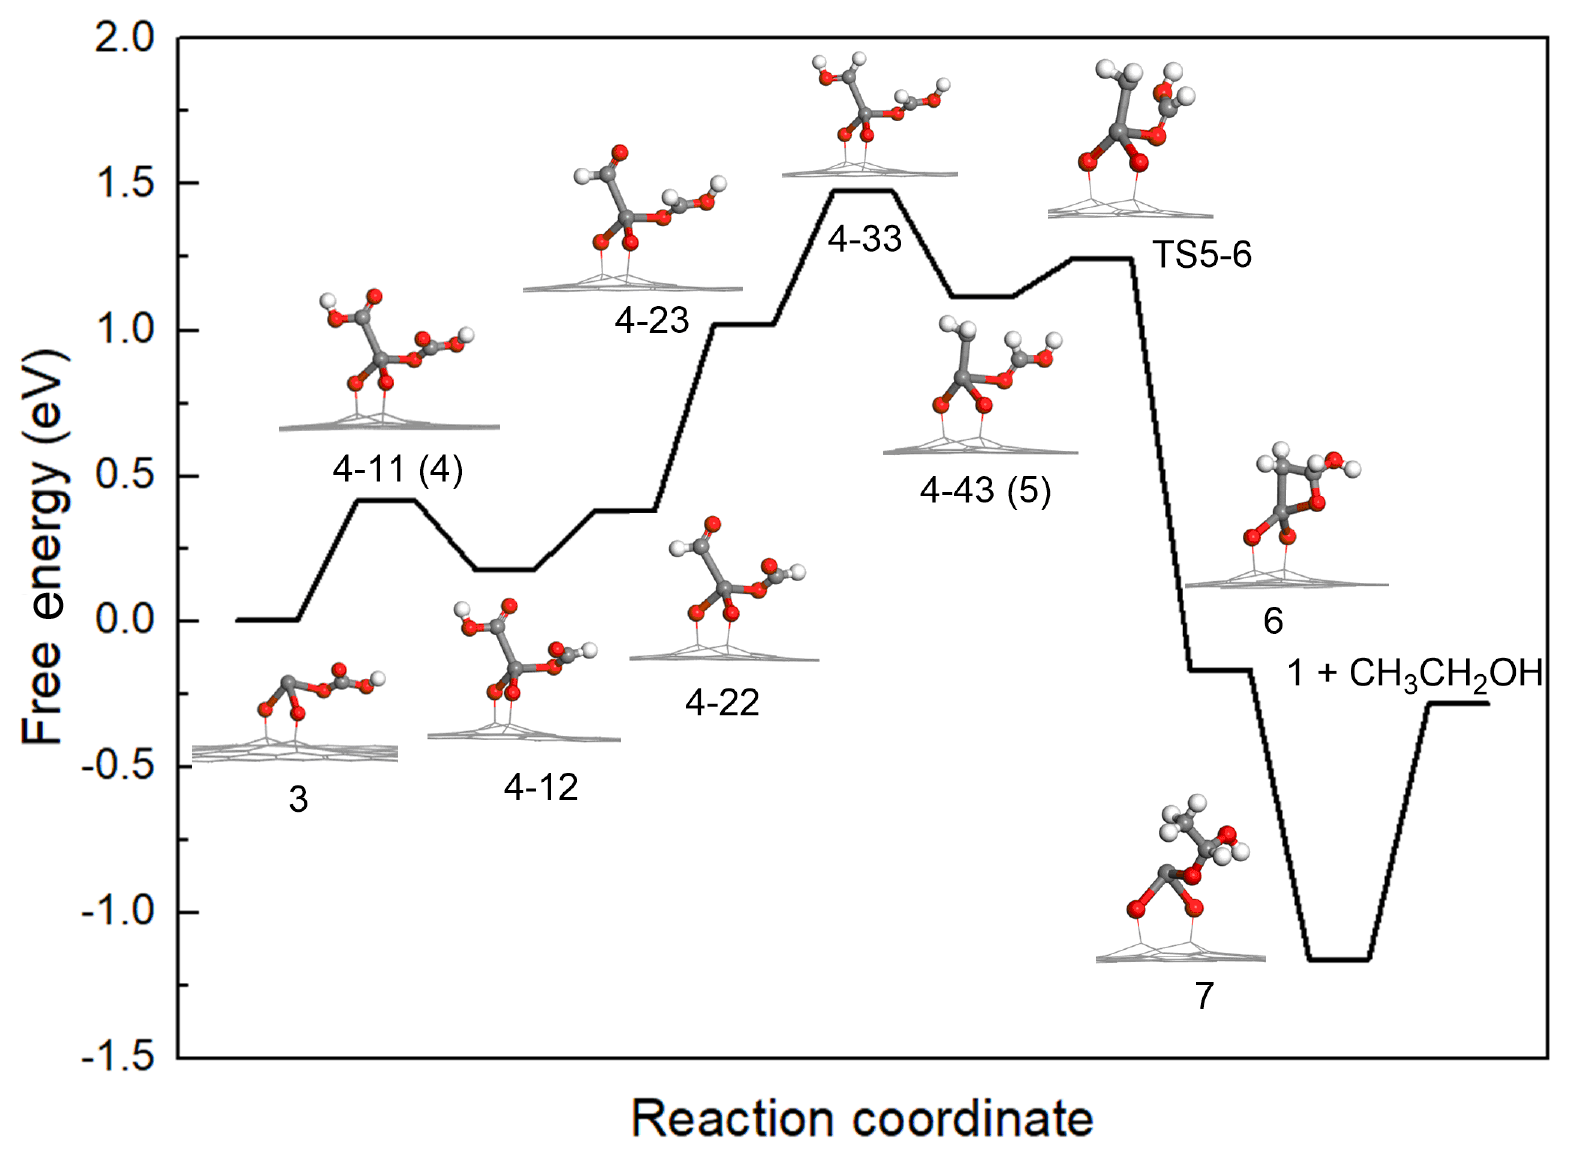
** **Extended data Fig. 58 |** Free energy profiles of favorable pathway for the formation of ethanol via the CO2RR on the Sn1-O3G catalyst.

**Note:** With drastic reduction of all carbonyl groups in **4**, the intermediate **5** is formed as the precursor for C-C coupling. With a barrier of 0.13 eV in the step of C-C bond formation, the intermediate **6** is generated with the structural characteristics of Sn-C-C-O quaternary ring. As the reduction process proceeds, the Sn-C bond and O-C bond are broken in succession, which is followed by CH3CH2OH desorption at the oxygen site of Sn1-O3G with a free energy barrier of 0.87 eV. Due to the flexibility of the O-C bond between the active oxygen site and carbon support, Sn1-O3G catalyst is distinguished by the bi-active site of Sn and O to adsorb different CO2RR intermediates, which offers a novel platform for the C-C bond formation in ethanol synthesis.

**Extended data Table 5.** Product identification based on peak information for CO2 reduction products compared to peak information for commercial standards.

| **CO2 Reduction Products** | | | | | | **Assignment** | | **Standards** | | | |
| --- | --- | --- | --- | --- | --- | --- | --- | --- | --- | --- | --- |
| Chemical shift | 1H splitting | J coupling | 13C (HSQC) | 13C (1D) | 13C splitting | Probed nucleus | Product name | 1H  splitting | Chemical shift | J coupling | 13C (1D) |
| 8.33 | s |  | 172.2 | 171.76 | s | HCOO- | Formate | s | 8.33 |  | 171.77 |
|  |  |  |  |  |  | H2O |  |  |  |  |  |
| 3.54 | q | 7.03 | 58.3 | 58.3 | d | CH3CH2OH | Ethanol | q | 3.53 | 7.32 | 58.3 |
|  |  |  |  |  |  | DMSO | Internal standard | s | 2.6 |  | 39.6 |
| 1.06 | T | 7.03 | 17.4 | 17.62 | d | CH3CH2OH | Ethanol | t | 1.06 | 7.08 | 17.63 |

**Extended data Table 6.** Performance comparison of various CO2RR to ethanol catalyst.

| **Catalyst** | **Medium and electrode** | **Onset potential vs. RHE (mV)** | **Ethanol Faradaic efficiency (%)** | **Geometric current density (mA/cm2)** | **Refs.** |
| --- | --- | --- | --- | --- | --- |
| Cu-TiO2/NG | CO2-saturated 0.2 M KI solution, carbon paper | 200 | 43.6 | -2.5 | (*11*) |
| Cu nanoparticle | 0.1 M KHCO3 or CsHCO3  at 1 atm CO2, carbon-paper | 530 | 14.8 | -12.3 | (*12*) |
| Cu2O-derived Cu | 0.1 M KHCO3, glassy carbon | N/A | 8.52 | -17.3 | (*13*) |
| Ag-Cu2O | 0.1 M KHCO3, glassy carbon | N/A | 33.6 | -3.1 | (*14*) |
| Plasma activated Cu | 0.1 M KHCO3, N/A | N/A | 22.6 | -11.5 | (*15*) |
| Cu2O | 0.1 M KHCO3, carbon paper | 330 | 15.3 | -32.1 | (*16*) |
| [4-(3-Phenoxy-2,2-bis(phenoxymethyl)  propoxy)pyridine]@Cu–Pd | 0.5 M KCl, carbon paper | 230 | 12 | -21 | (*17*) |
| Cu nanowire | 0.1 M KHCO3, N/A | N/A | 9.6 | -18.5 | (*18*) |
| B, N-doped nanodiamond | 0.1 M NaHCO3,  glassy carbon | 330 | 93.2 | -0.8 | (*19*) |
| N-doped mesoporous carbon | 0.1 M KHCO3, N/A | 260 | 62.5 | -0.9 | (*20*) |
| Cu cube | 0.1 M KHCO3, carbon-paper | N/A | 5.1 | -18.2 | (*21*) |
| HKUST-1 | 0.2 M KHCO3, carbon-paper | N/A | 20.1 | -10.3 | (*22*) |
| Cu (111) | 0.1 M KClO4, Cu | N/A | 17.8 | -18.1 | (*23*) |
| AuCu/Cu-SCA | 0.5 M KHCO3, carbon-paper | N/A | 17.6 | -23.5 | (*24*) |
| NGQDs | 1M KOH  gas diffusion electrode | N/A | 18.1 | -20.3 | (*25*) |
| Cu/N doped carbon | 0.5 M KHCO3, carbon-paper | 250 | 63 | -2.2 | (*26*) |
| SnS2/Sn1-O3G | 0.5 M KHCO3, carbon-paper | 210 | 82.5 | -17.8 | This work |

**Extended data Table 7.** Impurity content in 3D carbon and SnS2/Sn1-O3G determined by XPS and ICP-MS.

| **Sample** | **ICP (wt.%)** | | | | | **XPS (wt.%)** | | | | |
| --- | --- | --- | --- | --- | --- | --- | --- | --- | --- | --- |
| **Zn** | **Cu** | **Ni** | **Co** | **Zr** | **Zn** | **Cu** | **Ni** | **Co** | **Zr** |
| **3D carbon** | 0.008 | 0.003 | 0.007 | 0.001 | 0.003 | 0 | 0 | 0 | 0 | 0 |
| **SnS2/Sn1-O3G** | 0.007 | 0.002 | 0.009 | 0.003 | 0.005 | 0 | 0 | 0 | 0 | 0 |

**Extended data Table 8.** Fitting parameters of EXAFS data using the Sn-C and Sn-O paths for Sn1-O3G.

| **Path** | **N** | **R/Å (DFT)** | **R/Å (EXAFS)** | **Debye-Waller factor Δσ2 (Å2)** | **ΔE** | **R-factor** |
| --- | --- | --- | --- | --- | --- | --- |
| Sn-C | 6.8±0.74 | – | 2.096±0.01 | 0.0070±0.0015 | 1.14±1.38 | 0.02 |
| Sn-O | 3.65±0.25 | 1.976-2.009 | 2.087±0.007 | 0.0055±0.0009 | 4.35±0.85 | 0.01 |

EXAFS: extended X-ray absorption fine structure

DFT: density functional theory

N: coordination number

**Note:** The data range adopted for data fitting in k-space (Δk) and R space (ΔR) are 3.2-12.0 and 1-3 Å, respectively.Debye–Waller factors were fixed (to the values obtained in the best fit with set coordination numbers) during fitting the EXAFS to reduce the number of fitting parameters.

**Extended data Table 9.** Elementary reaction steps and reaction rate equations for CO2 reduction to CO taking place on Sn1-O3G.

| 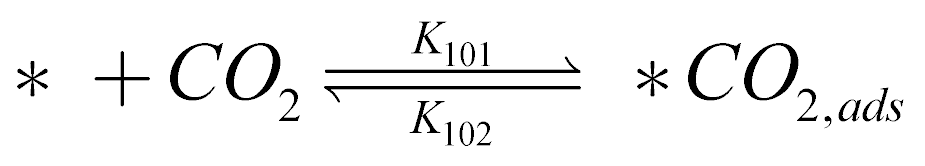 | (TS7.1) |
| --- | --- |
| 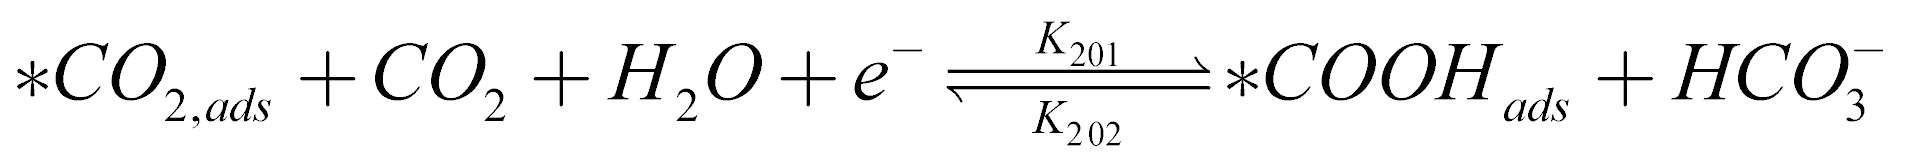 | (TS7.2) |
| 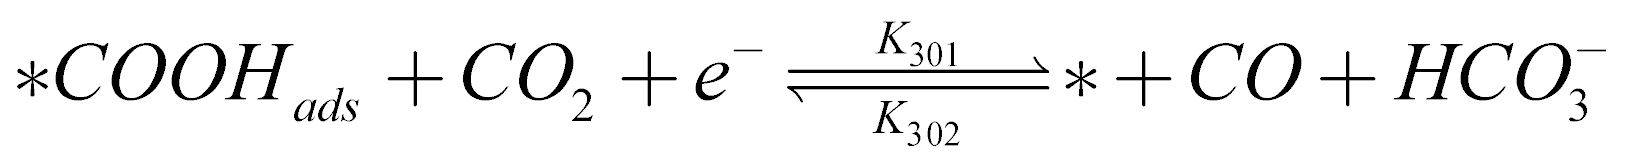 | (TS7.3) |
| 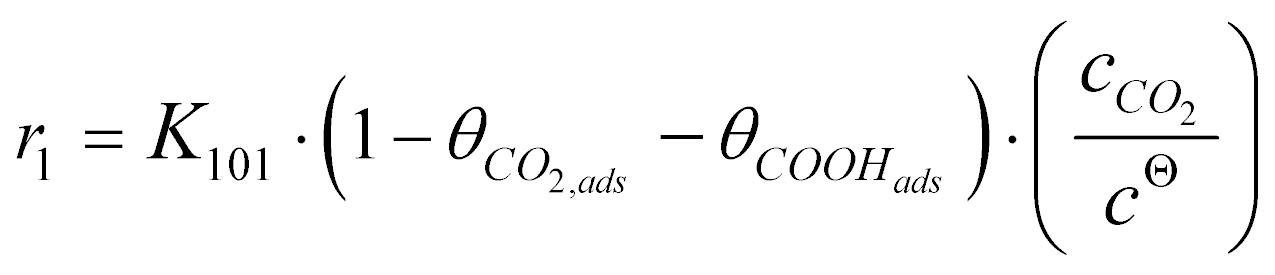 | (TS7.4) |
| 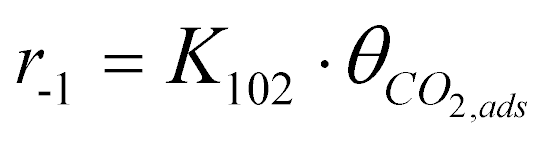 | (TS7.5) |
| 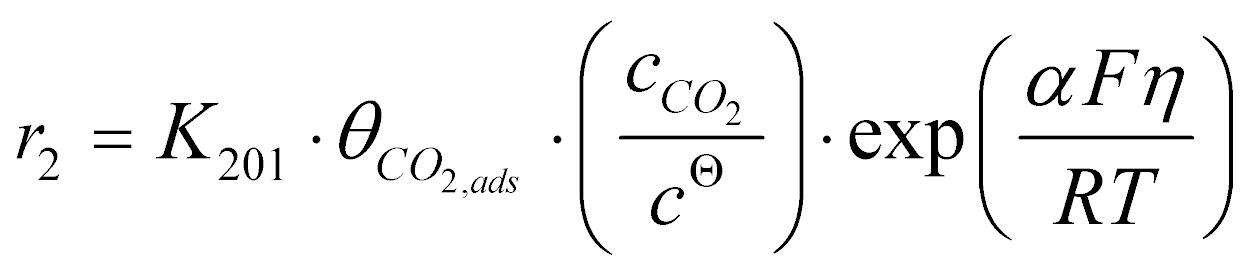 | (TS7.6) |
| 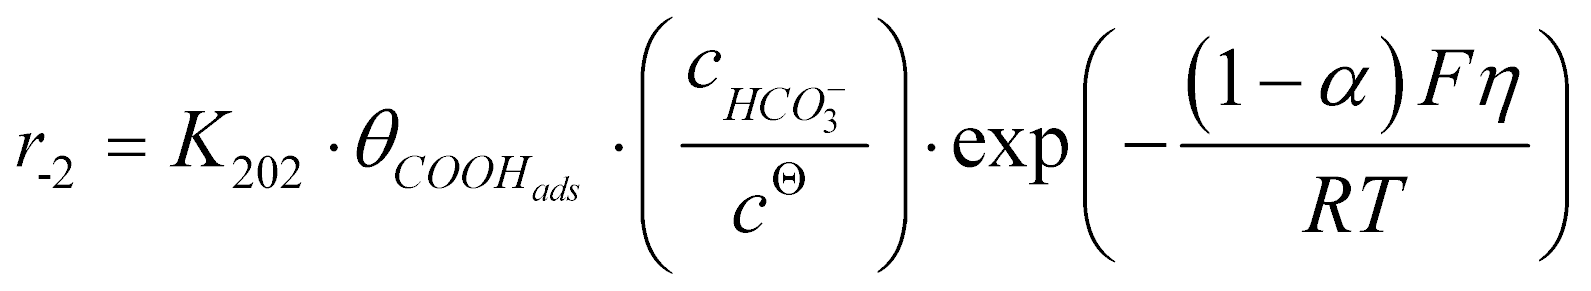 | (TS7.7) |
| 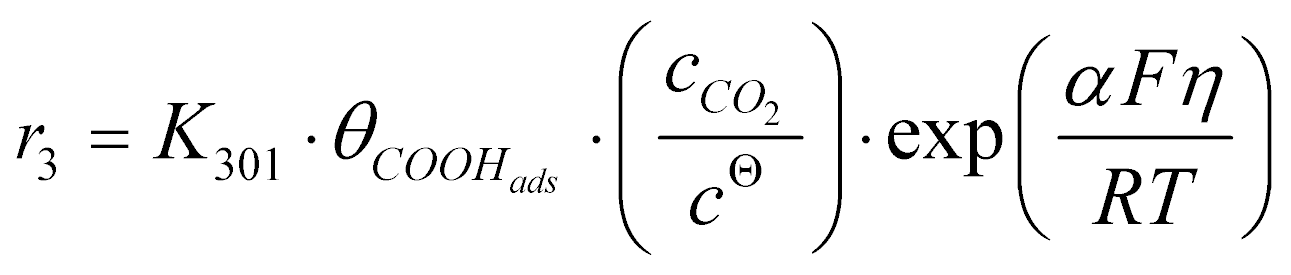 | (TS7.8) |
| 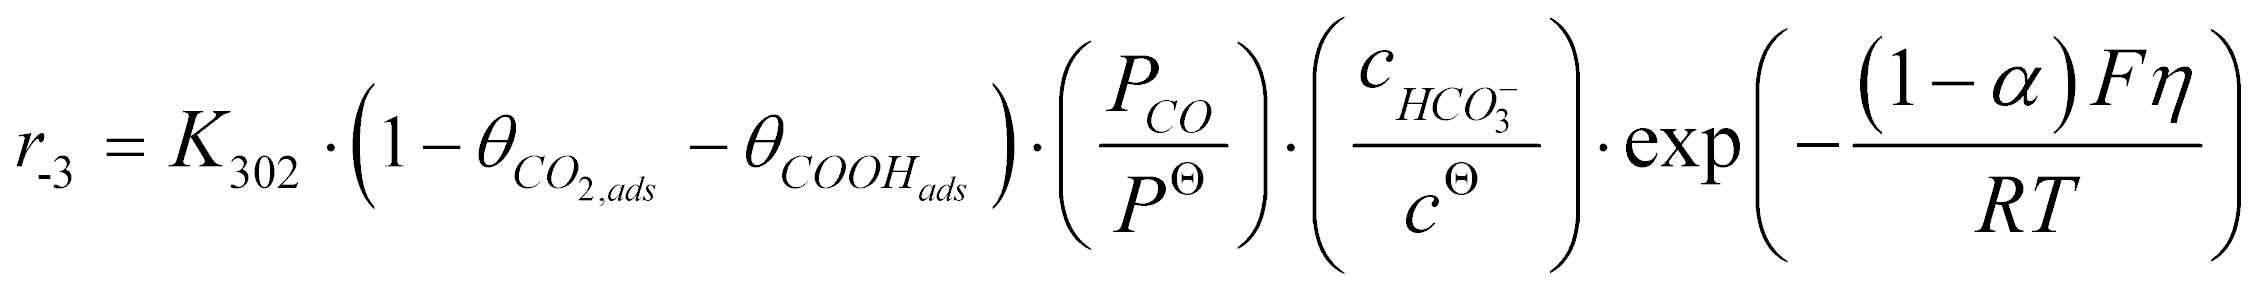 | (TS7.9) |

**Extended data Table 10.** Control equations for CO2 reduction to CO taking place on Sn1-O3G.

| 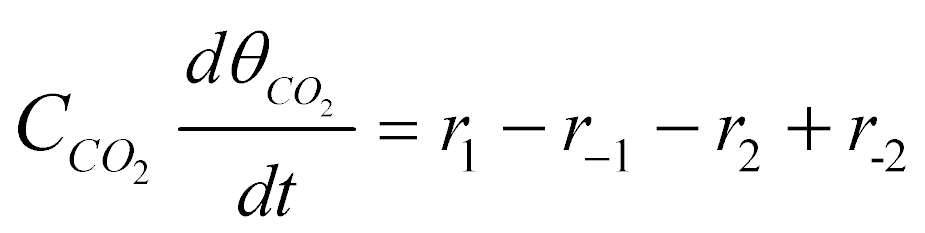 | (TS8.1) |
| --- | --- |
| 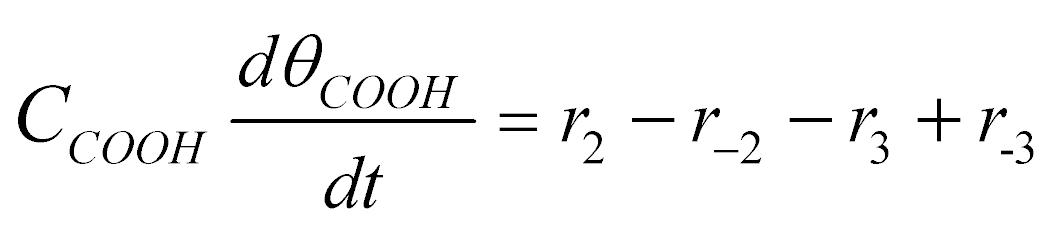 | (TS8.2) |
| 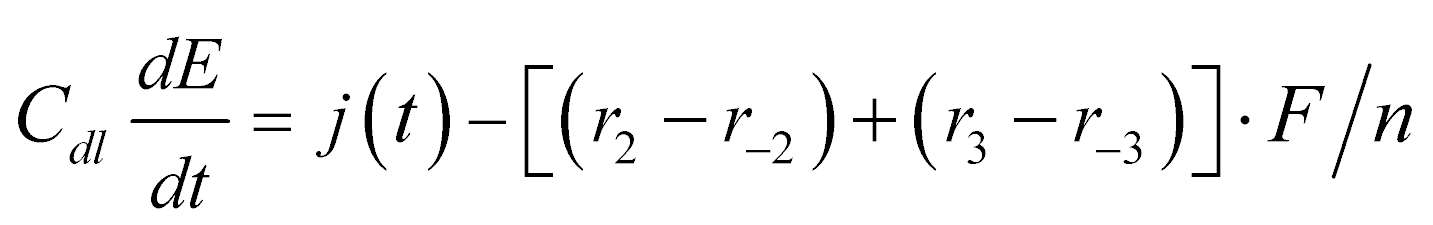 | (TS8.3) |

**Extended data Table 11.** Kinetics parameters for CO2 reduction to CO taking place on Sn1-O3G.

| K101 | K102 | K201 | K202 | K301 | K302 |
| --- | --- | --- | --- | --- | --- |
| 1.56×101 | 8.57×10-1 | 6.19×10-10 | 1.18×10-14 | 3.38×10-9 | 1.18×10-11 |

**Extended data Table 12.** Elementary reaction steps and reaction rate equations for CO2 reduction to HCOOH taking place on SnSx.

| 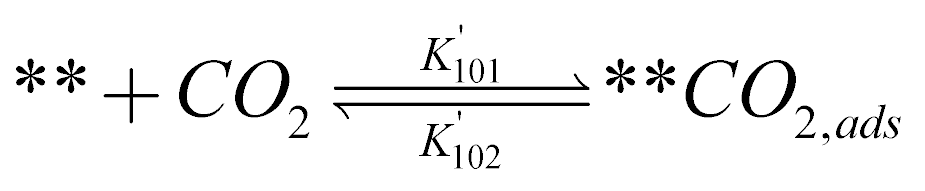 | (TS10.1) |
| --- | --- |
| 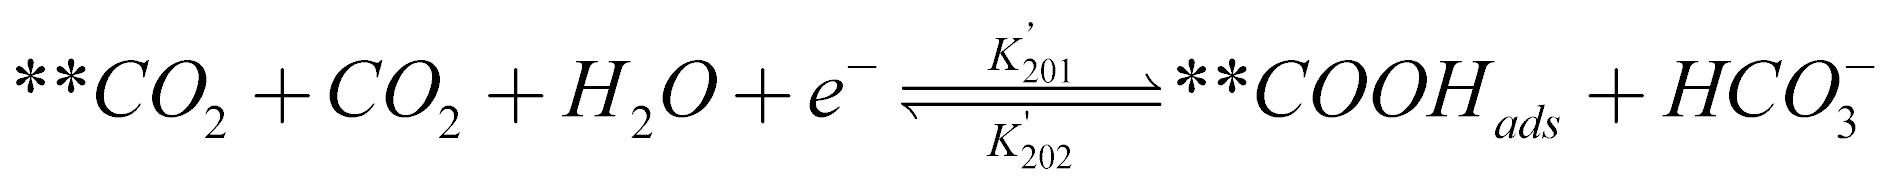 | (TS10.2) |
| 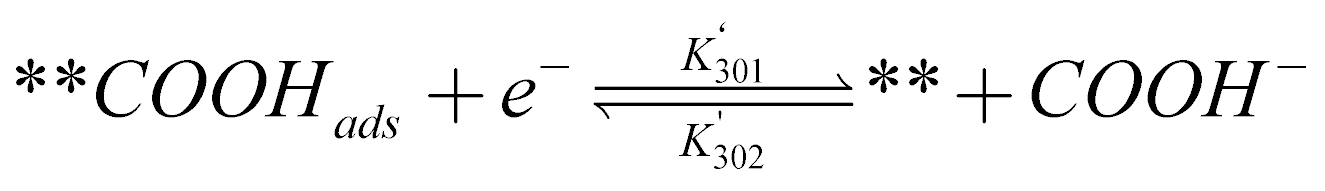 | (TS10.3) |
| 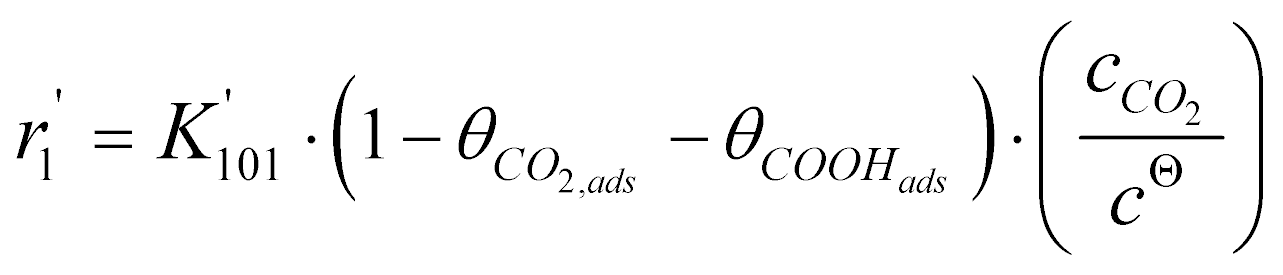 | (TS10.4) |
| 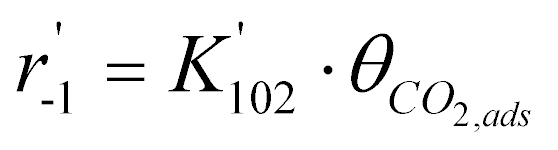 | (TS10.5) |
| 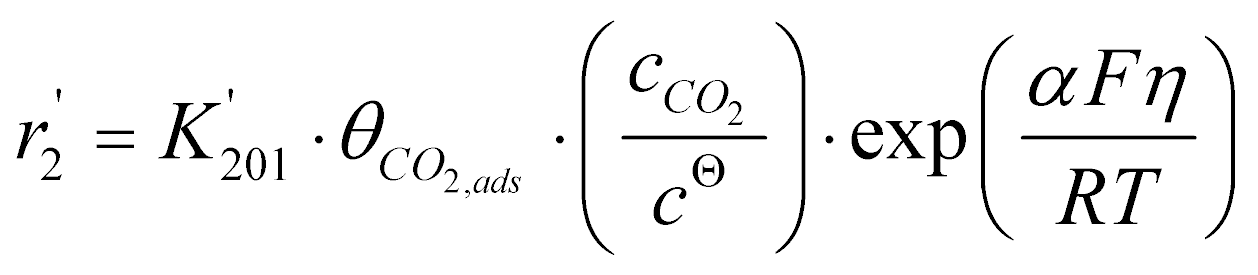 | (TS10.6) |
| 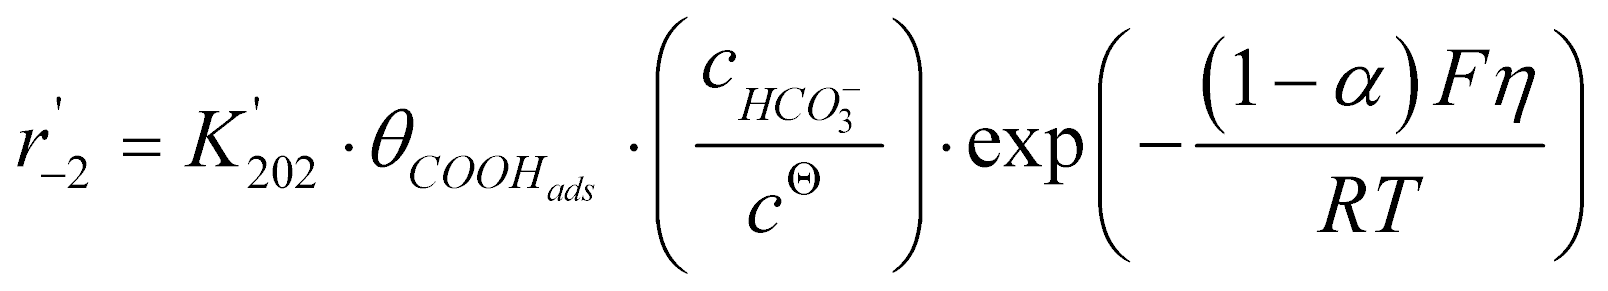 | (TS10.7) |
| 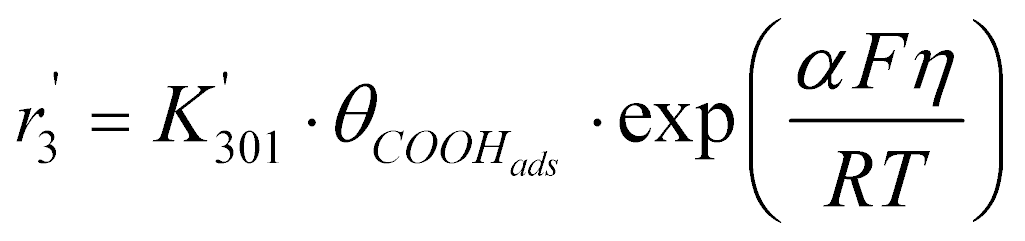 | (TS10.8) |
| 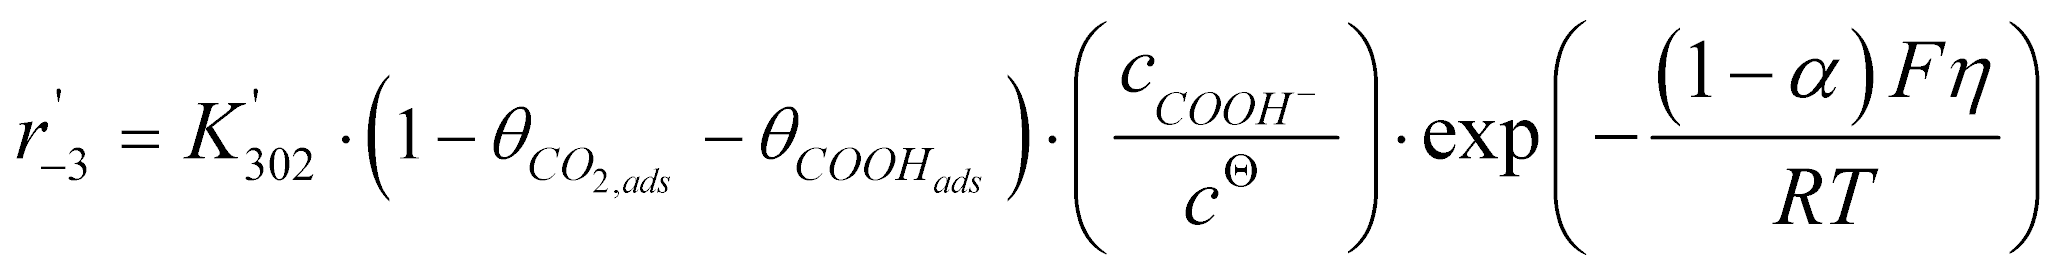 | (TS10.9) |

**Extended data Table 13.** Control equations for CO2 reduction to HCOOH taking place on SnSx.

| 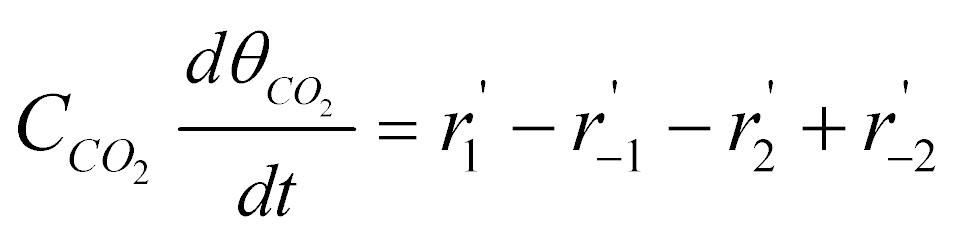 | (TS11.1) |
| --- | --- |
| 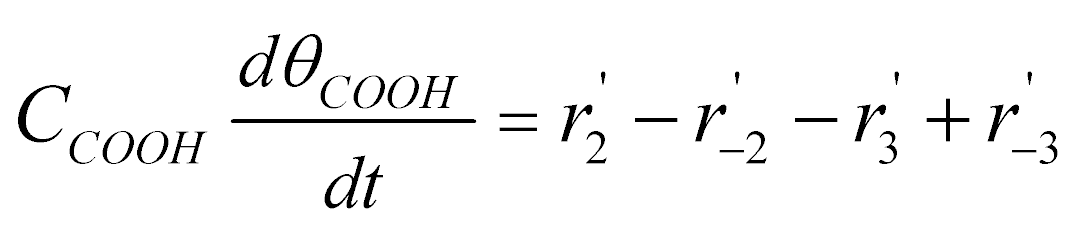 | (TS11.2) |
| 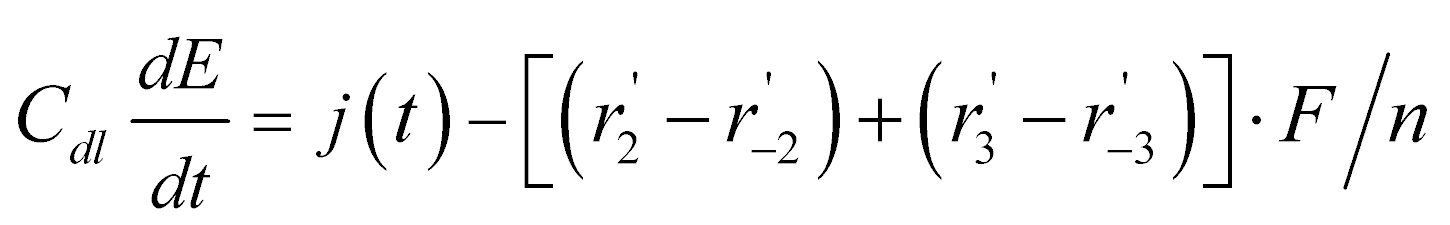 | (TS11.3) |

**Extended data Table 14.** Kinetics parameters for CO2 reduction to HCOOH taking place on SnSx.

| *K’101* | *K’102* | *K’201* | *K’202* | *K’301* | *K’302* |
| --- | --- | --- | --- | --- | --- |
| 5.49×101 | 5.01×10-1 | 1.40×10-9 | 5.11×10-14 | 7.23×10-9 | 4.83×10-11 |

**Extended data Table 15.** The elementary reaction steps and enrolled reaction rate equations for CO2 reduction to ethanol taking place on Sn1-O3G in the presence of HCOOH.

| 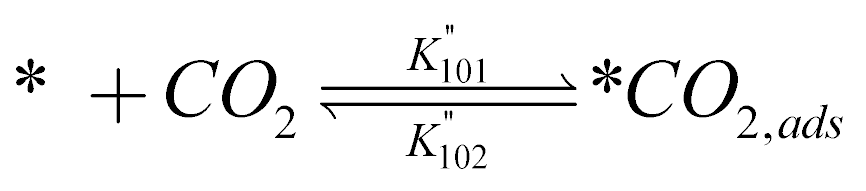 | (TS13.1) |
| --- | --- |
| 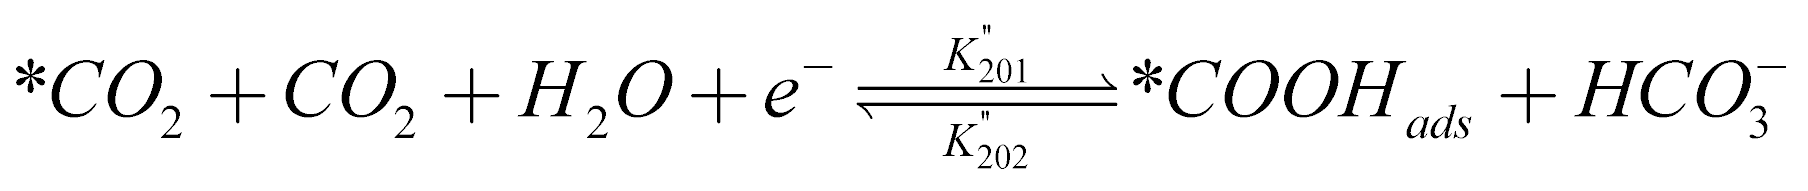 | (TS13.2) |
| 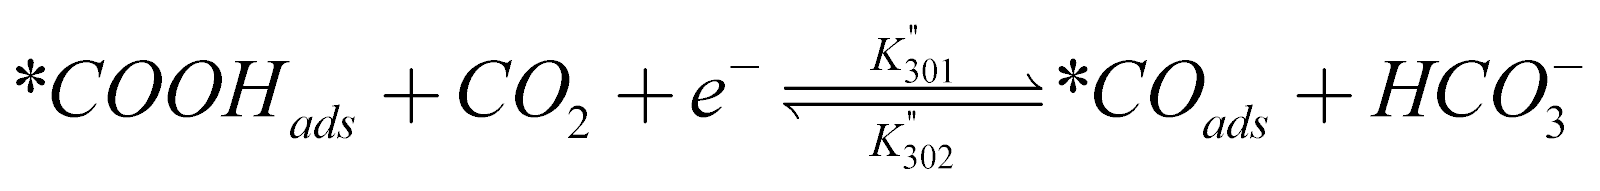 | (TS13.3) |
| 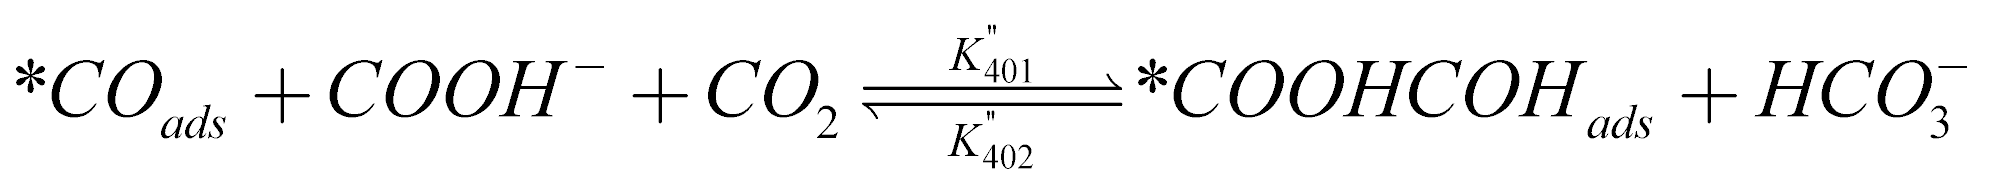 | (TS13.4) |
| 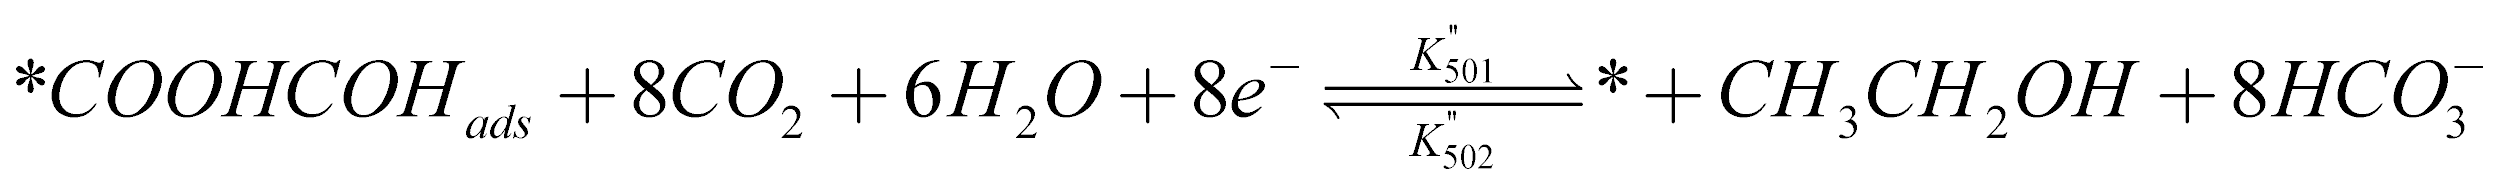 | (TS13.5) |
| 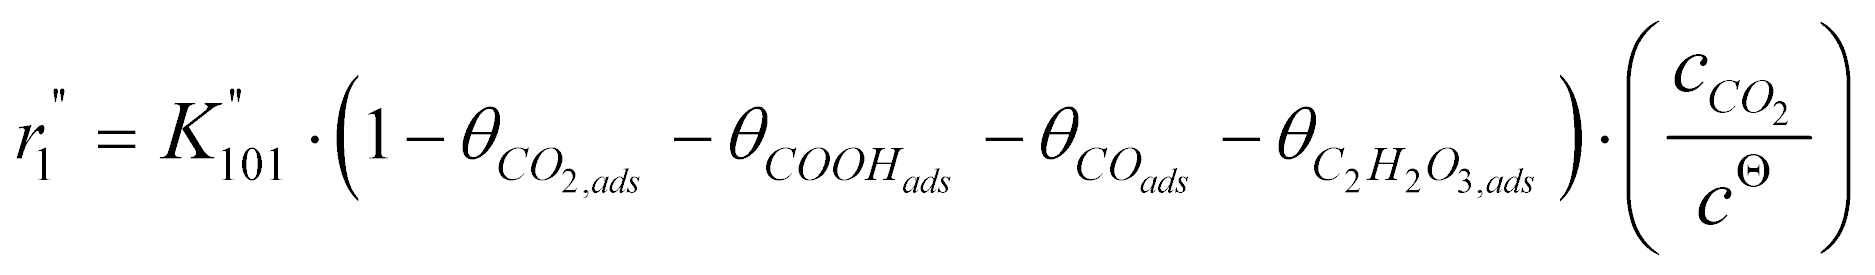 | (TS13.6) |
| 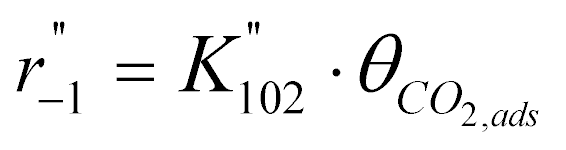 | (TS13.7) |
| 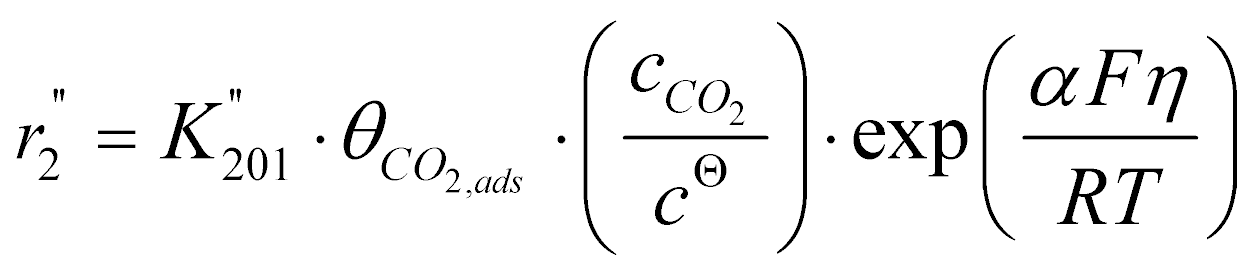 | (TS13.8) |
| 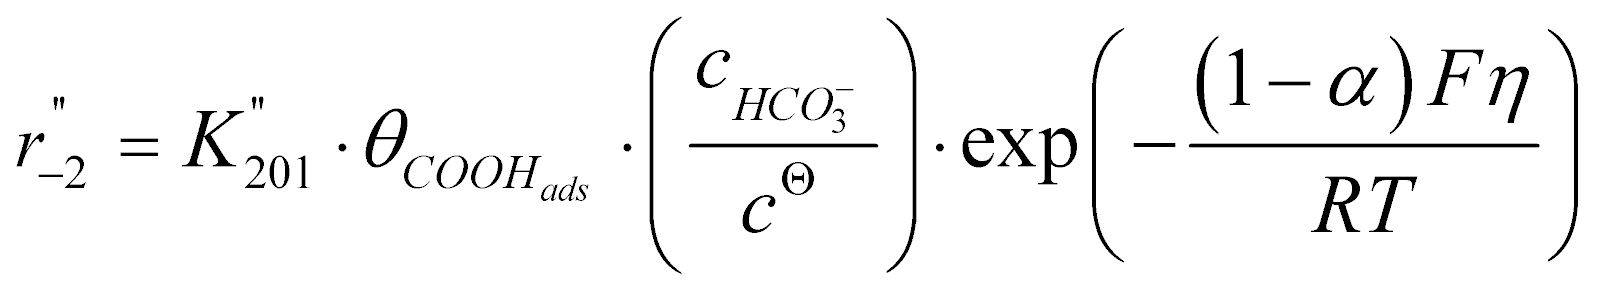 | (TS13.9) |
| 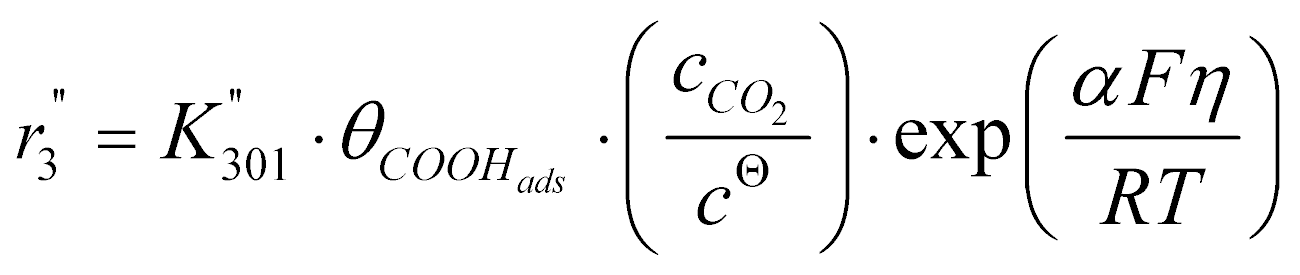 | (TS13.10) |
| 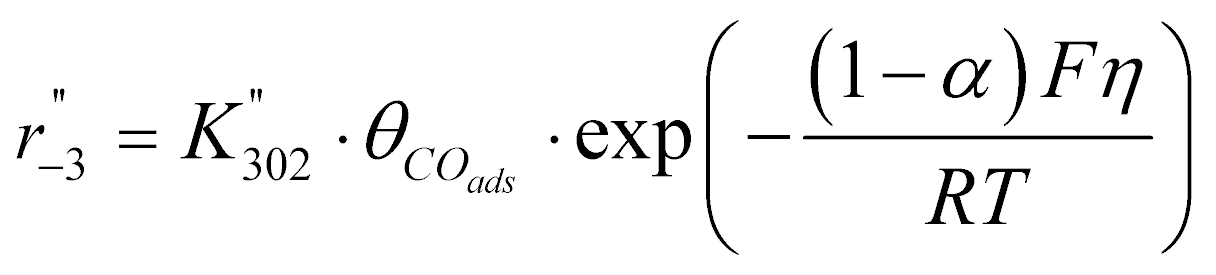 | (TS13.11) |
| 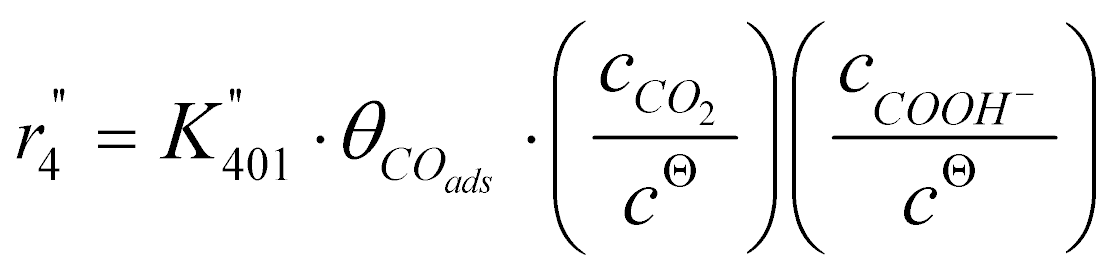 | (TS13.12) |
| 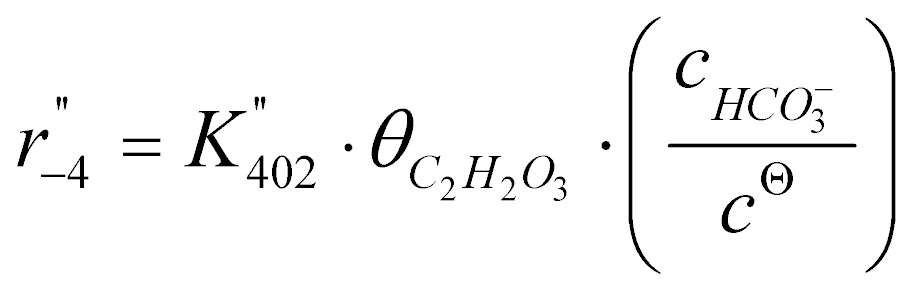 | (TS13.13) |
| 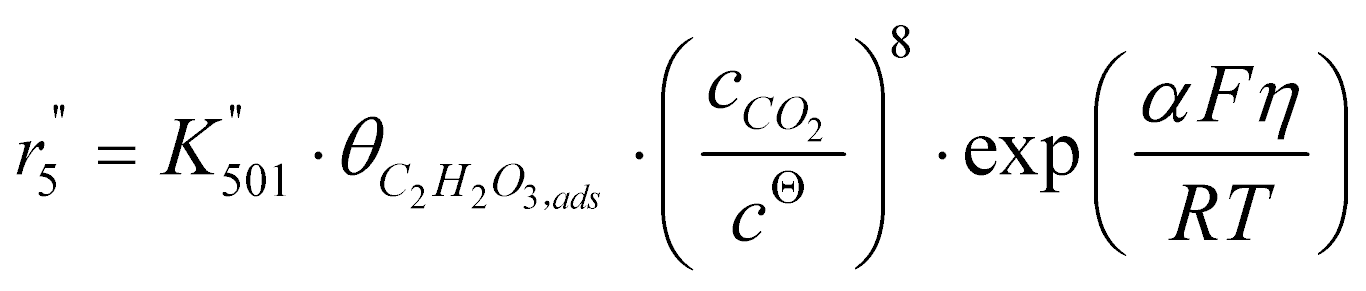 | (TS13.14) |
| 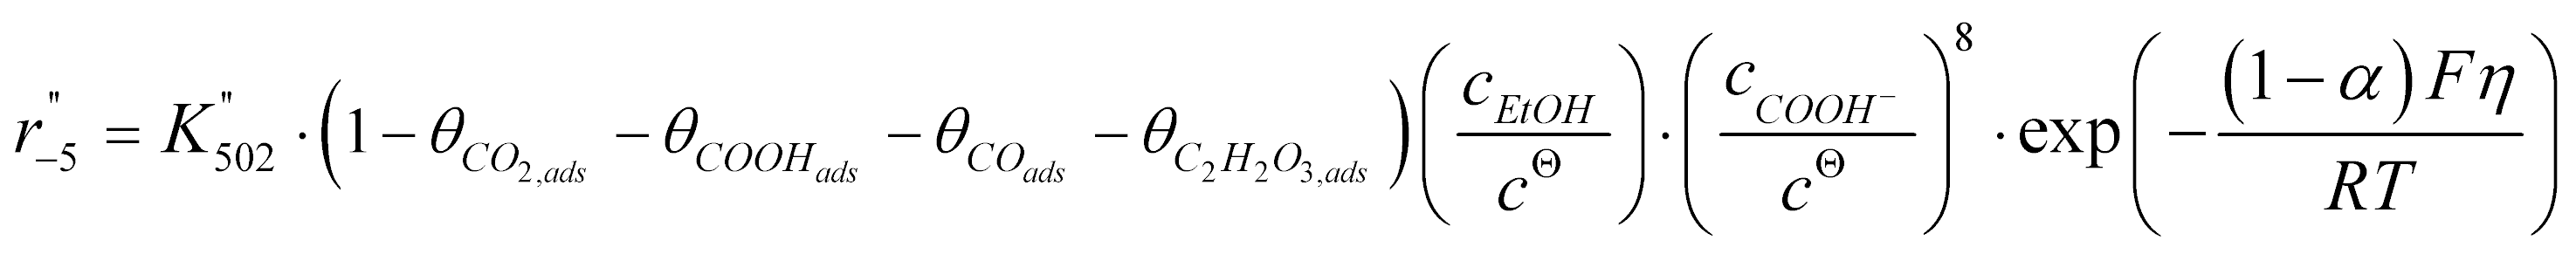 | (TS13.15) |

**Extended data Table 16.** Control equations for CO2 reduction to ethanol taking place on Sn1-O3G in the presence of HCOOH.

| 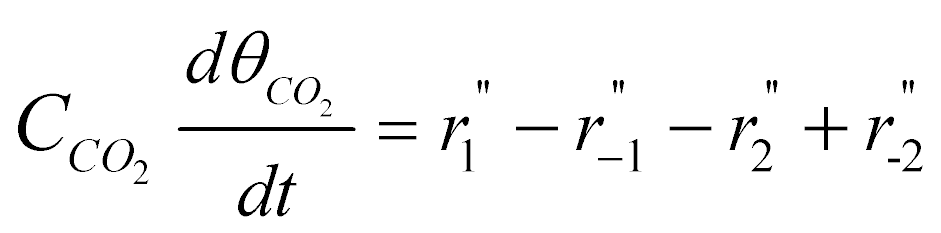 | (TS14.1) |
| --- | --- |
| 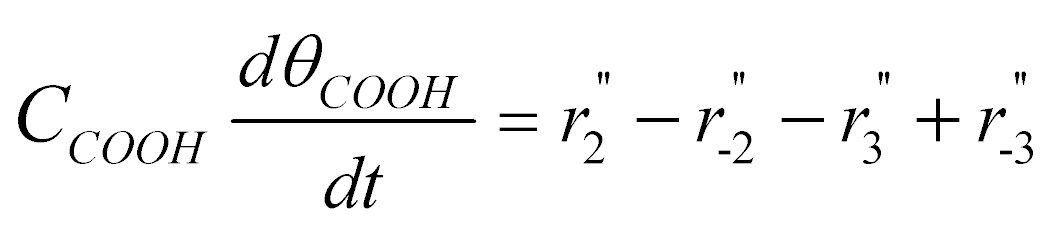 | (TS14.2) |
| 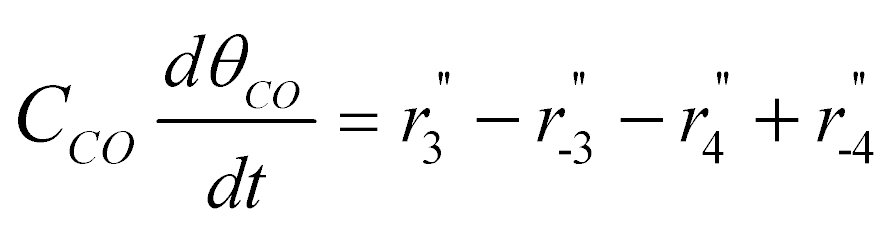 | (TS14.3) |
|  | (TS14.4) |
|  | (TS14.5) |

**Extended data Table 17.** Kinetics parameters for CO2 reduction to ethanol taking place on Sn1-O3G in presence of HCOOH.

| *K’’101* | *K’’102* | *K’’201* | *K’’202* | *K’’301* |
| --- | --- | --- | --- | --- |
| 1.56×101 | 8.57×10-1 | 6.19×10-10 | 1.18×10-14 | 3.38×10-9 |
| *K’’302* | *K’’401* | *K’’402* | *K’’501* | *K’’502* |
| 1.18×10-11 | 1.26×10-4 | 2.27×10-8 | 4.08×10-4 | 5.13×10-4 |

**Extended data Table 18**. The free energies for the network of competing C2 products relative to **3-2** (unit: eV). The contents in bold represent the favorable intermediates (or transition states) and the corresponding free energies relative to **3-2**.

| The group on  O site  The group on  Sn site | (1) COOH | (2) CHO | (3) CHOH | (4) CH2 |
| --- | --- | --- | --- | --- |
| (2) CHO | **4-21(4)**  **(0.517)** | **4-22**  **(0.376)** | **4-23**  **(1.018)** | 4-24  (2.178) |
| (3) CHOH | 4-31  (1.858) | 4-32  (1.273) | **4-33**  **(1.475)** | 4-34  (2.666) |
| (4) CH2 | 4-41  (0.662) | 4-42  (0.479) | **4-43**  **(1.116)** | 4-44  (1.274) |
| TS of C-C coupling | (2.298) | (1.937) | **(1.243)** | (1.418) |
| C2 adsorbate | 6-41  (2.143) | 6-42  (1.784) | **6**  **(-0.167)** | 6-44  (-0.619) |

**References and Notes**

1. K. Kim *et al.*, *Lanthanum-catalysed synthesis of microporous 3D graphene-like carbons in a zeolite template*. *Nature* **535**, 131-135 (2016).
2. G. Kresse, J. Furthmüller, *Efficient iterative schemes for ab initio total-energy calculations using a plane-wave basis set*. *Phys. Rev. B* **54**, 11169-11186 (1996).
3. G. Kresse, J. Furthmüller, *Efficiency of ab-initio total energy calculations for metals and semiconductors using a plane-wave basis set*. *Comput. Mater. Sci.* **6**, 15-50 (1996).
4. J. P. Perdew, K. Burke, M. Ernzerhof, *Generalized gradient approximation made simple*. *Phys. Rev. Lett.* **77**, 3865-3868 (1996).
5. G. Kresse, D. Joubert, *From ultrasoft pseudopotentials to the projector augmented-wave method*. *Phys. Rev. B* **59**, 1758-1775 (1999).
6. S. Grimme, J. Antony, S. Ehrlich, H. Krieg, *A consistent and accurate ab initio parametrization of density functional dispersion correction (DFT-D) for the 94 elements H-Pu*. *J. Chem. Phys.* **132**, 154104 (2010).
7. J. Rossmeisl, Z. W. Qu, H. Zhu, G. J. Kroes, J. K. Nørskov, *Electrolysis of water on oxide surfaces*. *J. Electroanal. Chem.* **607**, 83-89 (2007).
8. P. B. Fabritchnyi *et al. Tin-doped MgTiO3: a new material for studying the solid-gas interface making use of the 119Sn Mössbauer spectroscopic probe*. *Z. Naturforsch. B* **63**, 637-640 (2008).
9. H. Hayashi et al. *Discovery of a novel Sn(II)-based oxide β-SnMoO4 for daylight-driven photocatalysis*. *Adv. Sci.* **4**, 1600246-1600253 (2017).
10. J. G. Ballard et al. *119Sn Mössbauer spectra of some tin(II)-oxygen compounds*. *Can. J. Chem.* **53**, 3371-3373 (1975).
11. J. Yuan *et al.*, *Cu/TiO2 nanoparticles modified nitrogen-doped graphene as a highly efficient catalyst for the selective electroreduction of CO2 to different alcohols*. *J. CO2 Util.* **24**, 334-340 (2018).
12. D. Kim, C. S. Kley, Y. Li, P. Yang, *Copper nanoparticle ensembles for selective electroreduction of CO2 to C2–C3 products*. *Proc. Natl. Acad. Sci. USA* **114**, 10560 (2017).
13. Y. Huang, A. D. Handoko, P. Hirunsit, B. S. Yeo, *Electrochemical reduction of CO2 using copper single-crystal surfaces: effects of CO* coverage on the selective formation of ethylene*. *ACS Catal.* **7**, 1749-1756 (2017).
14. S. Lee, G. Park, J. Lee, *Importance of Ag–Cu biphasic boundaries for selective electrochemical reduction of CO2 to ethanol*. *ACS Catal.* **7**, 8594-8604 (2017).
15. D. Gao *et al.*, *Plasma-activated copper nanocube catalysts for efficient carbon dioxide electroreduction to hydrocarbons and alcohols*. *ACS Nano* **11**, 4825-4831 (2017).
16. D. Ren *et al.*, *Selective electrochemical reduction of carbon dioxide to ethylene and ethanol on copper(I) oxide catalysts*. *ACS Catal.* **5**, 2814-2821 (2015).
17. H.-P. Yang *et al.*, *Entrapment of a pyridine derivative within a copper–palladium alloy: a bifunctional catalyst for electrochemical reduction of CO2 to alcohols with excellent selectivity and reusability*. *Catal. Sci. Technol.* **6**, 6490-6494 (2016).
18. M. Ma, K. Djanashvili, W. A. Smith, *Controllable hydrocarbon formation from the electrochemical reduction of CO2 over Cu nanowire arrays*. *Angew. Chem. Int. Ed.* **55**, 6680-6684 (2016).
19. Y. Liu *et al.*, *Selective electrochemical reduction of carbon dioxide to ethanol on a boron- and nitrogen-co-doped nanodiamond*. *Angew. Chem. Int. Ed.* **56**, 15607-15611 (2017).
20. Y. Song et al., *Metal-free nitrogen-doped mesoporous carbon for electroreduction of CO2 to ethanol*. *Angew. Chem. Int. Ed.* **56**, 10840-10844 (2017).
21. P. Grosse et al., *Dynamic changes in the structure, chemical state and catalytic selectivity of Cu nanocubes during CO2 electroreduction: size and support effects*. *Angew. Chem. Int. Ed.* **57**, 6192-6197 (2018).
22. J. Albo *et al.*, *Copper-based metal–organic porous materials for CO2 electrocatalytic reduction to alcohols*. *ChemSusChem* **10**, 1100-1109 (2017).
23. Y. Huang, C. W. Ong, B. S. Yeo, *Effects of electrolyte anions on the reduction of carbon dioxide to ethylene and ethanol on copper (100) and (111) surfaces*. *ChemSusChem* **11**, 3299-3306 (2018).
24. D. Kim, J. Resasco, Y. Yu, A. M. Asiri, P. Yang, *Synergistic geometric and electronic effects for electrochemical reduction of carbon dioxide using gold–copper bimetallic nanoparticles*. *Nat. Commun.* **5**, 4948 (2014).
25. J. Wu *et al.*, *A metal-free electrocatalyst for carbon dioxide reduction to multi-carbon hydrocarbons and oxygenates*. *Nat. Commun.* **7**, 13869 (2016).
26. Y. Song *et al.*, *High-selectivity electrochemical conversion of CO2 to ethanol using a copper nanoparticle/N-doped graphene electrode*. *ChemistrySelect* **1**, 6055-6061 (2016).
